# Supplementary material for: Connectivity Homology Enables Inter-Species Network Models of Synthetic Lethality
Source: PubMed Central journal article supplement (PMC4599967; doi:10.1371/journal.pcbi.1004506), 2015-10-09
Supplement: pcbi.1004506.s018.pdf [file pcbi.1004506.s018.pdf]

|                 |         | 2nd Degree Shared Neighbors | Betweenness Centrality | Closeness Centrality | Communi-cability | Current-flow Betweenness Centrality | Degree Centrality | Eccen-tricity | Eigenvector Centrality | Inverse Shortest Path | PageRank  | Shared Neighbors | Shared non-neighbors |
|-----------------|---------|-----------------------------|------------------------|----------------------|------------------|-------------------------------------|-------------------|---------------|------------------------|-----------------------|-----------|------------------|----------------------|
| Cerevisae-Pombe | MWU     | 29693.5                     | 460889                 | 2192                 | 0                | 398166                              | 413170            | 2             | 437106                 | 101498.5              | 12745     | 256887.5         | 0                    |
|                 | p-value | 9.84E-291                   | 0.0011                 | <2.2E-16             | <2.2E-16         | 1.31E-15                            | 7.86E-12          | <2.2E-16      | 5.56E-07               | 2.50E-224             | <2.2E-16  | 3.10E-118        | <2.2E-16             |
| Cerevisae-Mouse | MWU     | 31873                       | 442123                 | 504                  | 0                | 445945.5                            | 194189            | 0             | 344992                 | 80512                 | 132671    | 233678           | 0                    |
|                 | p-value | 4.56E-288                   | 2.83E-06               | <2.2E-16             | <2.2E-16         | 1.25E-05                            | 1.10E-125         | <2.2E-16      | 1.69E-33               | 1.18E-247             | 2.70E-178 | 4.46E-145        | <2.2E-16             |
| Cerevisae-Human | MWU     | 311210.5                    | 327722                 | 369844               | 69               | 271969.5                            | 196167            | 44895         | 350074                 | 438865.5              | 31788     | 406604           | 0                    |
|                 | p-value | 1.04E-48                    | 3.70E-41               | 3.39E-24             | <2.2E-16         | 2.96E-70                            | 6.21E-123         | <2.2E-16      | 1.81E-31               | 5.85E-08              | 3.40E-288 | 1.47E-15         | <2.2E-16             |
| Pombe-Mouse     | MWU     | 495858                      | 435956.5               | 445933               | 335172           | 387754.5                            | 194674            | 20939         | 412643                 | 480893                | 34263     | 488812.5         | 0                    |
|                 | p-value | 0.3742                      | 9.48E-08               | 1.41E-05             | 1.30E-37         | 1.62E-19                            | 1.08E-125         | <2.2E-16      | 6.66E-12               | 0.0602                | 3.67E-285 | 0.0205           | <2.2E-16             |
| Pombe-Human     | MWU     | 98830                       | 406552                 | 19307                | 0                | 332705                              | 197158            | 8371          | 436114                 | 136340                | 3664      | 320172           | 0                    |
|                 | p-value | 3.08E-212                   | 6.56E-14               | 1.22E-303            | <2.2E-16         | 2.27E-39                            | 1.02E-122         | <2.2E-16      | 3.76E-07               | 4.31E-186             | <2.2E-16  | 2.45E-76         | <2.2E-16             |
| Mouse-Human     | MWU     | 85225                       | 447096                 | 14237                | 0                | 451730                              | 397249            | 0             | 477952                 | 108443                | 10286     | 298150           | 0                    |
|                 | p-value | 1.00E-226                   | 1.22E-05               | 5.15E-310            | <2.2E-16         | 6.97E-05                            | 5.53E-16          | <2.2E-16      | 0.0439                 | 5.44E-216             | <2.2E-16  | 2.76E-95         | <2.2E-16             |
