# Supplementary material for: Connectivity Homology Enables Inter-Species Network Models of Synthetic Lethality
Source: PubMed Central journal article supplement (PMC4599967; doi:10.1371/journal.pcbi.1004506), 2015-10-09
Supplement: pcbi.1004506.s020.pdf [file pcbi.1004506.s020.pdf]

| <b>Gene 1</b> | <b>Gene 2</b> | <b>SL-Score</b> |
|---------------|---------------|-----------------|
| Gpbp1         | Gtf2b         | 0.957           |
| Sh3kbp1       | Atxn2         | 0.954           |
| Gpbp1         | Spata24       | 0.953           |
| Zfp513        | Nkd2          | 0.952           |
| Hist2h4       | Srf           | 0.952           |
| Bach1         | Btg2          | 0.948           |
| Gtf2b         | Spata24       | 0.947           |
| Syn2          | Krt76         | 0.945           |
| Ncam1         | Pde10a        | 0.944           |
| Ptpn6         | Cd3e          | 0.944           |
| Map2k4        | Tmem115       | 0.943           |
| Phc3          | Fos           | 0.943           |
| Ubb           | Rnf14         | 0.943           |
| Fadd          | Atg5          | 0.942           |
| Sap18         | Hist1h2ai     | 0.942           |
| Pias1         | Sap18         | 0.941           |
| Ep300         | Myod1         | 0.941           |
| Tcrb          | Cd3e          | 0.94            |
| Bach1         | Crem          | 0.939           |
| Egr2          | Zfp110        | 0.939           |
| Smc3          | Atrx          | 0.939           |
| Gnb1          | Gnao1         | 0.938           |
| Gnb1          | Btk           | 0.938           |
| Id1           | Tfdp2         | 0.938           |
| Pura          | Mybl2         | 0.938           |
| Pias3         | Pias1         | 0.938           |
| Hist3h2a      | Phf17         | 0.938           |
| H1f0          | Ccna2         | 0.937           |
| Sf3b1         | Spata24       | 0.937           |
| Dok2          | Nck1          | 0.936           |
| Hand2         | Hand1         | 0.936           |
| Ubb           | Ulk1          | 0.936           |
| Myo6          | Plekhg5       | 0.936           |
| Bach1         | Hoxd13        | 0.935           |
| Six6          | Tle4          | 0.935           |
| Hist2h4       | H3            | 0.935           |
| Syn2          | Myo5a         | 0.935           |
| Als2          | Tcerg1        | 0.934           |
| Hist2h4       | Rnf14         | 0.934           |
| Pura          | Syn2          | 0.934           |
| Barx2         | Tle1          | 0.934           |
| Btk           | Gng2          | 0.934           |
| Bag1          | Dnajb6        | 0.933           |
| Phc3          | Spata24       | 0.933           |
| Kif5c         | Kif5a         | 0.933           |

|          |          |       |
|----------|----------|-------|
| Syn2     | Fus      | 0.933 |
| Atg5     | Atg12    | 0.932 |
| Ntrk1    | Ngfr     | 0.932 |
| Hist3h2a | Rnf14    | 0.932 |
| Iqgap1   | Pafah1b1 | 0.932 |
| Id1      | Hand1    | 0.931 |
| Fadd     | Fas      | 0.931 |
| Slc11a1  | Spata24  | 0.931 |
| Egr2     | Cflar    | 0.931 |
| Atg5     | Atg16l1  | 0.931 |
| Tirap    | Pag1     | 0.931 |
| Ncoa6    | Cbx7     | 0.931 |
| Gpbp1    | Taf1c    | 0.93  |
| Id1      | Cops8    | 0.93  |
| Sirt1    | Ep300    | 0.93  |
| Rab7     | Sun2     | 0.93  |
| Pparg    | Ifrd1    | 0.93  |
| Pparg    | Ncor1    | 0.93  |
| Ubb      | Pdlim4   | 0.93  |
| Kif5c    | Kif5b    | 0.93  |
| H1f0     | Ccnb1    | 0.93  |
| Syn2     | Capzb    | 0.93  |
| Pura     | Kif5a    | 0.929 |
| Ncoa6    | Spata24  | 0.929 |
| Syn2     | Nf1      | 0.929 |
| Gtf2h1   | Csde1    | 0.928 |
| Egr2     | Tbk1     | 0.928 |
| Syn2     | Bcr      | 0.928 |
| Il17rc   | Il17ra   | 0.927 |
| Carm1    | Ncoa2    | 0.927 |
| Id1      | Tsc22d3  | 0.927 |
| Sp7      | Dlx2     | 0.927 |
| Aldoa    | Suz12    | 0.927 |
| Eya1     | Neurog1  | 0.927 |
| Pparg    | Hdac6    | 0.927 |
| Cask     | Ambra1   | 0.927 |
| Bach1    | Men1     | 0.926 |
| Lmnb1    | Sun2     | 0.926 |
| Egr2     | Stam2    | 0.926 |
| Ntrk1    | Ulk1     | 0.926 |
| Pparg    | E2f1     | 0.926 |
| Bach1    | Col5a1   | 0.925 |
| Usf1     | Ccna2    | 0.925 |
| Id1      | Cops6    | 0.925 |
| Barx2    | Atf2     | 0.925 |
| Pias3    | Taf1c    | 0.925 |

|         |         |       |
|---------|---------|-------|
| Max     | Huwe1   | 0.925 |
| Ryr2    | Sri     | 0.925 |
| Bach1   | Col3a1  | 0.924 |
| Aldoa   | Ngfr    | 0.924 |
| Ubb     | Anxa1   | 0.924 |
| Dynll1  | Tubb5   | 0.924 |
| Hoxd13  | Sox15   | 0.924 |
| Tnf     | Fadd    | 0.923 |
| Gpbp1   | Pcmt1   | 0.923 |
| Rab7    | Lbr     | 0.923 |
| Egr2    | Ntrk1   | 0.923 |
| Ube2i   | 2-Sep   | 0.923 |
| Ptpn6   | Vav1    | 0.923 |
| Gtf2h1  | Aagab   | 0.922 |
| Gtf2h1  | Cdk7    | 0.922 |
| Six6    | Aes     | 0.922 |
| Hist2h4 | Ubb     | 0.922 |
| Mtf1    | Hoxa1   | 0.922 |
| Irak4   | Tirap   | 0.922 |
| Egr2    | Was     | 0.922 |
| Dynll1  | Tuba1b  | 0.922 |
| Syn2    | Eef1a1  | 0.922 |
| Foxh1   | Dlx2    | 0.922 |
| Mecp2   | Ifrd1   | 0.921 |
| Gpbp1   | Taf5    | 0.921 |
| Gpbp1   | Zfp592  | 0.921 |
| Gtf2h1  | Irf4    | 0.921 |
| Zfp354a | H3      | 0.921 |
| Smc2    | Crem    | 0.921 |
| Pparg   | Ngfr    | 0.921 |
| Pparg   | Runx2   | 0.921 |
| Ccnh    | Cdk7    | 0.921 |
| Mef2a   | Foxh1   | 0.92  |
| Epc1    | Ncoa6   | 0.92  |
| Id1     | Ascl1   | 0.92  |
| Id1     | Otx2    | 0.92  |
| Slc11a1 | Atg16l1 | 0.92  |
| Pias3   | Zdhhc13 | 0.92  |
| Sun2    | Syne2   | 0.92  |
| Irf5    | Irak1   | 0.92  |
| Pparg   | Sykb    | 0.92  |
| Gab1    | Diap1   | 0.92  |
| Epc1    | Rarg    | 0.919 |
| Gpbp1   | Pias3   | 0.919 |
| Pcmt1   | Rxra    | 0.919 |
| Sod1    | Myog    | 0.919 |

|          |          |       |
|----------|----------|-------|
| Traf3    | Ticam1   | 0.919 |
| Mtf1     | Maml1    | 0.919 |
| Egr2     | Sykb     | 0.919 |
| Pparg    | Nr0b2    | 0.919 |
| Syn2     | Ppp2cb   | 0.919 |
| Syn2     | Hspa9    | 0.919 |
| Gab1     | Atxn2    | 0.919 |
| Sorbs1   | Cd2ap    | 0.918 |
| Gbbp1    | Polr1b   | 0.918 |
| Zfp513   | Zscan2   | 0.918 |
| Ubtf     | Polr1b   | 0.918 |
| Id3      | Ivns1abp | 0.918 |
| Irf8     | Tbk1     | 0.918 |
| Id1      | Irf4     | 0.918 |
| Sod1     | Zfp110   | 0.918 |
| Gtf2h1   | Ccnh     | 0.918 |
| Slc11a1  | H3f3a    | 0.918 |
| Hist1h3f | Ccnb1    | 0.918 |
| Pparg    | Nr1h4    | 0.918 |
| Syn2     | Arhgef7  | 0.918 |
| Syn2     | Plec     | 0.918 |
| Myo6     | Gipc1    | 0.918 |
| Ptrf     | Ldhb     | 0.918 |
| Bag1     | Creb1    | 0.917 |
| Id1      | Eya3     | 0.917 |
| Lmnb1    | Myh9     | 0.917 |
| Rab7     | Serbp1   | 0.917 |
| Siah2    | Ncor1    | 0.917 |
| Ppard    | Foxh1    | 0.917 |
| Pparg    | Zfp110   | 0.917 |
| Pparg    | Fos      | 0.917 |
| Scmh1    | Spata24  | 0.917 |
| Fas      | Ncor1    | 0.917 |
| Foxh1    | Sox15    | 0.917 |
| Gbbp1    | Eya3     | 0.916 |
| Rab7     | Eif3i    | 0.916 |
| Mtf2     | Ivns1abp | 0.916 |
| Ubb      | Polr1a   | 0.916 |
| Ubb      | Tuba1b   | 0.916 |
| Clybl    | Rapgef1  | 0.916 |
| Taf1c    | Taf1b    | 0.916 |
| Bag1     | Spna2    | 0.915 |
| Usf1     | Grip1    | 0.915 |
| Jup      | Ctnna1   | 0.915 |
| Dok2     | Rasa1    | 0.915 |
| Irf8     | Ngfr     | 0.915 |

|          |           |       |
|----------|-----------|-------|
| Hist2h4  | Rfx4      | 0.915 |
| Egr2     | Hdac6     | 0.915 |
| Egr2     | Ngfr      | 0.915 |
| Pparg    | Tbk1      | 0.915 |
| Hist3h2a | Pdlim4    | 0.915 |
| Six3     | Tle4      | 0.914 |
| Nrip1    | Kcnd2     | 0.914 |
| Bach1    | Eif4enif1 | 0.913 |
| Map2k4   | Malt1     | 0.913 |
| Rnh1     | Dsg1a     | 0.913 |
| Gtf2h1   | Abtb1     | 0.913 |
| Zfp354a  | Hist2h2be | 0.913 |
| Max      | Pcna      | 0.913 |
| Mixl1    | Pou4f2    | 0.913 |
| Aldoa    | Ntrk1     | 0.913 |
| Aldoa    | Krt73     | 0.913 |
| Tirap    | Tubg1     | 0.913 |
| Pparg    | Hist4h4   | 0.913 |
| Ncoa6    | Ppp2ca    | 0.913 |
| Ube2d1   | Cul7      | 0.913 |
| Map2k4   | Bcl10     | 0.912 |
| Als2     | Grin2d    | 0.912 |
| Sod1     | Ntrk1     | 0.912 |
| Tle1     | Atf2      | 0.912 |
| Egr2     | Phf20     | 0.912 |
| Aldoa    | Krt76     | 0.912 |
| Ep300    | Rela      | 0.912 |
| Ppard    | Nr1h4     | 0.912 |
| Pparg    | Ulk1      | 0.912 |
| Pparg    | Pdx1      | 0.912 |
| Pparg    | Phf12     | 0.912 |
| Ncoa6    | H2afx     | 0.912 |
| Ubb      | Psme3     | 0.912 |
| Ubb      | Phf2      | 0.912 |
| Fancd2   | Cflar     | 0.912 |
| Klrb1c   | Ambra1    | 0.912 |
| Srf      | Hdac5     | 0.912 |
| Bag1     | Suz12     | 0.911 |
| Il17rc   | Traf3ip2  | 0.911 |
| Usf1     | Hist3h2a  | 0.911 |
| Gpbp1    | Kat2a     | 0.911 |
| Cryab    | Fbxo4     | 0.911 |
| Id3      | Ttn       | 0.911 |
| Six3     | Aes       | 0.911 |
| Egr2     | Myog      | 0.911 |
| Egr2     | Tnk2      | 0.911 |

|          |          |       |
|----------|----------|-------|
| Nefl     | Nefh     | 0.911 |
| Ubb      | Hist3h2a | 0.911 |
| Syn2     | Casp3    | 0.911 |
| Blnk     | Gng2     | 0.911 |
| Hist3h2a | Phf2     | 0.911 |
| Mef2a    | Mef2d    | 0.91  |
| Map2k4   | Mib2     | 0.91  |
| Gbbp1    | Hdac10   | 0.91  |
| Lmnb1    | Lbr      | 0.91  |
| Polk     | Pcna     | 0.91  |
| Rab7     | Rab5a    | 0.91  |
| Pias3    | Taf1a    | 0.91  |
| Egr2     | Arntl    | 0.91  |
| Egr2     | Ctcf     | 0.91  |
| Egr2     | Cdh1     | 0.91  |
| Med1     | Hmga1    | 0.91  |
| Pparg    | Mc4r     | 0.91  |
| Ubb      | Zfp277   | 0.91  |
| Capn2    | Vrk3     | 0.91  |
| Dynll1   | Tuba4a   | 0.91  |
| Brca1    | Brca2    | 0.91  |
| Bach1    | Hoxa13   | 0.909 |
| Gtf2a1l  | Taf13    | 0.909 |
| Epc1     | Cbx8     | 0.909 |
| Epc1     | Hist3h2a | 0.909 |
| Kat5     | Atm      | 0.909 |
| Lmnb1    | Hsp90b1  | 0.909 |
| Egr2     | Junb     | 0.909 |
| Aldoa    | Myog     | 0.909 |
| Aldoa    | Ldha     | 0.909 |
| Pparg    | Msx2     | 0.909 |
| Fancd2   | Tbk1     | 0.909 |
| Suz12    | Plp1     | 0.909 |
| Bag1     | Ptk2     | 0.908 |
| Psm4     | Glud1    | 0.908 |
| Psm4     | Hnrnp    | 0.908 |
| Sin3b    | Phf12    | 0.908 |
| Irf8     | Junb     | 0.908 |
| Sod1     | Prkcsh   | 0.908 |
| Rab3d    | Atp5d    | 0.908 |
| Hist2h4  | Mbip     | 0.908 |
| Hist2h4  | Zfp277   | 0.908 |
| Pias3    | Taf1b    | 0.908 |
| Mll1     | Rnf14    | 0.908 |
| Zfp236   | Maml1    | 0.908 |
| Egr2     | Prkcsh   | 0.908 |

|          |            |       |
|----------|------------|-------|
| Egr2     | Notch1     | 0.908 |
| Med1     | Nrip1      | 0.908 |
| H1f0     | Cebpa      | 0.908 |
| Syn2     | Acta1      | 0.908 |
| Git1     | Arhgef7    | 0.908 |
| Polr1b   | Ctcf       | 0.908 |
| Cdk4     | Psmc10     | 0.908 |
| Gab1     | Sh3bp2     | 0.908 |
| Gtf2a1l  | Aes        | 0.907 |
| Lmnb1    | Eif3i      | 0.907 |
| Gtf2h1   | Tfdp2      | 0.907 |
| Cdk5     | Ccna2      | 0.907 |
| Wwp2     | Egr2       | 0.907 |
| Tle1     | Ifrd1      | 0.907 |
| Ndel1    | Nefl       | 0.907 |
| Egr2     | Smurf1     | 0.907 |
| Egr2     | Casp8      | 0.907 |
| Pparg    | Sh3gl2     | 0.907 |
| H1       | Ccnb1      | 0.907 |
| Foxh1    | Hoxa13     | 0.907 |
| Bag1     | Ppp1cb     | 0.906 |
| Mef2a    | Eif4enif1  | 0.906 |
| Myh10    | 2900073G15 | 0.906 |
| Gtf2h1   | Gtf2f1     | 0.906 |
| Six1     | Neurog1    | 0.906 |
| Hnf1b    | Kat2b      | 0.906 |
| Rab7     | Syne2      | 0.906 |
| Mixl1    | Rbl1       | 0.906 |
| Mixl1    | Hoxc4      | 0.906 |
| Ncam1    | Atp1a3     | 0.906 |
| Ube2i    | Sumo3      | 0.906 |
| Pparg    | Arntl      | 0.906 |
| Dbp      | Clock      | 0.906 |
| Hist3h2a | Nr1h4      | 0.906 |
| Gab1     | Irs2       | 0.906 |
| Mef2a    | Tnf        | 0.905 |
| Gpbp1    | Hist3h2a   | 0.905 |
| Irf8     | Msx2       | 0.905 |
| Pcgf2    | Spata24    | 0.905 |
| Hist2h4  | Trim27     | 0.905 |
| Egr2     | Skil       | 0.905 |
| Bcl10    | Mib2       | 0.905 |
| Aldoa    | Nfkbia     | 0.905 |
| Fancd2   | Sykb       | 0.905 |
| Eif4e    | Eif2a      | 0.905 |
| Ifrd1    | Rfxank     | 0.905 |

|         |          |       |
|---------|----------|-------|
| Tbrg1   | Ppp1r9b  | 0.905 |
| Spata24 | Phc2     | 0.905 |
| Bach1   | Vsx2     | 0.904 |
| Tnfaip3 | Ssbp3    | 0.904 |
| Psmc4   | Psmc2    | 0.904 |
| Rsad2   | Irf7     | 0.904 |
| Als2    | Nrip1    | 0.904 |
| Epc1    | Rbm39    | 0.904 |
| Itch    | Junb     | 0.904 |
| Rnh1    | Ctnn     | 0.904 |
| Id1     | Abtb1    | 0.904 |
| Lmnb1   | Syne2    | 0.904 |
| Rai14   | Pdlim4   | 0.904 |
| Pias3   | Abt1     | 0.904 |
| Zap70   | Sla      | 0.904 |
| Egr2    | Eif2c2   | 0.904 |
| Cops8   | Cops6    | 0.904 |
| Prkca   | Actn2    | 0.904 |
| Notch2  | Smarcd3  | 0.904 |
| Pparg   | Reg1     | 0.904 |
| Ubb     | Ctnn     | 0.904 |
| Dynll1  | Tubb2c   | 0.904 |
| Ube2d1  | Ptma     | 0.904 |
| Dusp3   | Vrk3     | 0.904 |
| Mef2a   | Ncor2    | 0.903 |
| Map2k4  | Mapk8ip1 | 0.903 |
| Mecp2   | Lbxcor1  | 0.903 |
| Mecp2   | Nr1h4    | 0.903 |
| Shc1    | Atxn2    | 0.903 |
| Als2    | Homer2   | 0.903 |
| Usf1    | Kat2a    | 0.903 |
| Gbbp1   | Csk      | 0.903 |
| Smad9   | Btg2     | 0.903 |
| Rnh1    | Yeats2   | 0.903 |
| Id1     | Gtf2h1   | 0.903 |
| Cd2ap   | Sykb     | 0.903 |
| Gtf2h1  | Zfp592   | 0.903 |
| Hist2h4 | Sfn      | 0.903 |
| Hnf1a   | Zfp236   | 0.903 |
| Cdx1    | Dlx1     | 0.903 |
| Ywhag   | Mark3    | 0.903 |
| Egr2    | Trim32   | 0.903 |
| Aldoa   | Zfp110   | 0.903 |
| Med1    | Tbx21    | 0.903 |
| H1f0    | Iqgap1   | 0.903 |
| Syn2    | Eef1a2   | 0.903 |



|          |           |       |       |
|----------|-----------|-------|-------|
| Itpr3    | Trpc4     | 0.903 |       |
| Map2k4   | Peli2     | 0.902 |       |
| Psma4    | Lox       | 0.902 |       |
| Gnb1     | Adrbk1    | 0.902 |       |
| Rnh1     | Ubb       | 0.902 |       |
| Id3      | Hand1     | 0.902 |       |
| Id3      | Anxa1     | 0.902 |       |
| Sod1     | Myh3      | 0.902 |       |
| Gtf2h1   | Tgfb1i1   | 0.902 |       |
| Skp1a    | Mcl1      | 0.902 |       |
| Egr2     | Bcr       | 0.902 |       |
| Egr2     | Hist2h2bb | 0.902 |       |
| Smurf1   | Runx2     | 0.902 |       |
| Arrb1    | Yes1      | 0.902 |       |
| Zfp110   | Ngfr      | 0.902 |       |
| Ubb      | Phf17     | 0.902 |       |
| H1f0     | Gtf2b     | 0.902 |       |
| Fancd2   | Fam175b   | 0.902 |       |
| Dynll1   | Hnrnph2   | 0.902 |       |
| Thrb     | Ncor1     | 0.902 |       |
| Hist3h2a | Zfp277    | 0.902 |       |
| Bach1    | Zeb2      | 0.901 |       |
| Syvn1    | Hsp90b1   | 0.901 |       |
| Psma4    | Ptpn13    | 0.901 |       |
| Als2     | Cacng2    | 0.901 |       |
| Dok2     | Nck2      | 0.901 |       |
| Rnh1     | Hsp90b1   | 0.901 |       |
| Id3      | Ncoa2     | 0.901 |       |
| Hist2h4  | Ddx5      | 0.901 |       |
| Hist2h4  | Psme3     | 0.901 |       |
| Tle1     | Srf       | 0.901 |       |
|          | 5-Sep     | 7-Sep | 0.901 |
| Slc11a1  | Phc2      | 0.901 |       |
| Pias3    | Cxxc1     | 0.901 |       |
| Mtf1     | Tox3      | 0.901 |       |
| Egr2     | Mcl1      | 0.901 |       |
| Pparg    | Fam175b   | 0.901 |       |
| Ubb      | Spata24   | 0.901 |       |
| Fancd2   | Junb      | 0.901 |       |
| Syn2     | Hspa2     | 0.901 |       |
| Fasn     | Atxn2     | 0.901 |       |
| Sf1      | Pin1      | 0.9   |       |
| Bach1    | Smad9     | 0.9   |       |
| Bach1    | Smurf1    | 0.9   |       |
| Map2k4   | Fadd      | 0.9   |       |
| Epc1     | Barx2     | 0.9   |       |

|         |          |       |
|---------|----------|-------|
| Cd40    | Map2k7   | 0.9   |
| Rnh1    | Tfrc     | 0.9   |
| Irf8    | Sh3gl2   | 0.9   |
| Sirt1   | Trp53    | 0.9   |
| Hnf1a   | Hnf4a    | 0.9   |
| Egr2    | Gli2     | 0.9   |
| Tmf1    | Irak1    | 0.9   |
| Ncam1   | Zfp36    | 0.9   |
| Trib2   | Trib3    | 0.9   |
| Pparg   | Gfi1b    | 0.9   |
| Phc3    | Phc2     | 0.9   |
| H1f0    | Map2k7   | 0.9   |
| Fbxw8   | Skp1a    | 0.899 |
| Bag1    | Btrc     | 0.899 |
| Bag1    | Gnao1    | 0.899 |
| Shc1    | Sykb     | 0.899 |
| Sin3b   | Ifrd1    | 0.899 |
| Id3     | Hist2h4  | 0.899 |
| Id3     | Neurog2  | 0.899 |
| Id3     | Rfx4     | 0.899 |
| Irf8    | Flt1     | 0.899 |
| Id1     | Ncoa2    | 0.899 |
| Hand1   | Ascl1    | 0.899 |
| Rab7    | Ttn      | 0.899 |
| Hist2h4 | Neurog2  | 0.899 |
| Pura    | Atp5a1   | 0.899 |
| Slc11a1 | Zfp110   | 0.899 |
| Slc11a1 | Map1lc3a | 0.899 |
| Egr2    | Fam175b  | 0.899 |
| Aldoa   | Actn4    | 0.899 |
| Pparg   | Ski      | 0.899 |
| Pparg   | Myod1    | 0.899 |
| Pparg   | Jund     | 0.899 |
| Fancd2  | Sh3gl2   | 0.899 |
| Cask    | Sh3gl1   | 0.899 |
| Tmem115 | Mapk8ip1 | 0.899 |
| Mef2a   | Col5a1   | 0.898 |
| Map2k4  | Khdrbs1  | 0.898 |
| Id3     | Pdcd6    | 0.898 |
| Cd2ap   | Dok3     | 0.898 |
| Rac1    | Rps6ka3  | 0.898 |
| Fbxl2   | Calm1    | 0.898 |
| Lmnb1   | Ptma     | 0.898 |
| Pura    | Smn1     | 0.898 |
| Egr2    | Csf1r    | 0.898 |
| Aldoa   | Ticam1   | 0.898 |

|         |          |       |
|---------|----------|-------|
| Sf3b2   | Psmc3    | 0.898 |
| Pparg   | Cflar    | 0.898 |
| Kdm4c   | Kdm6b    | 0.898 |
| Syn2    | Trim32   | 0.898 |
| Gtf3c1  | Hoxd13   | 0.898 |
| Hhex    | Fos      | 0.898 |
| Map2k6  | Dusp2    | 0.897 |
| Gtf2a1l | Pou6f1   | 0.897 |
| Gnb1    | Gng2     | 0.897 |
| Eme1    | Mus81    | 0.897 |
| Psmb4   | Hsp90aa1 | 0.897 |
| Usp2    | Ntrk1    | 0.897 |
| Sod1    | Casp8    | 0.897 |
| Nr3c2   | Stub1    | 0.897 |
| Zfp369  | Siah2    | 0.897 |
| Pura    | Tfdp2    | 0.897 |
| Slc11a1 | Prkcd    | 0.897 |
| Mll1    | Arntl    | 0.897 |
| Egr2    | Smn1     | 0.897 |
| Atg5    | Casp8    | 0.897 |
| Mixl1   | Hoxa11   | 0.897 |
| Eya3    | Irf7     | 0.897 |
| Ncam1   | Atp1a1   | 0.897 |
| Phf20   | Kdm6b    | 0.897 |
| Notch2  | Ryr2     | 0.897 |
| Capn2   | Mdk      | 0.897 |
| Ifrd1   | Pdx1     | 0.897 |
| Crocc   | Mapk8ip1 | 0.897 |
| Id1     | Cnot8    | 0.896 |
| Gtf2h1  | Gtf2h2   | 0.896 |
| Ascl1   | Neurog2  | 0.896 |
| Tlr4    | Ticam1   | 0.896 |
| Egr2    | Pax3     | 0.896 |
| Egr2    | Casp3    | 0.896 |
| Egr2    | Flt1     | 0.896 |
| Klc1    | Mapk8ip3 | 0.896 |
| Tirap   | Trim28   | 0.896 |
| Syn2    | Ppp3ca   | 0.896 |
| Casp8   | Ulk1     | 0.896 |
| Sorbs1  | Rapgef1  | 0.895 |
| Als2    | Grin2c   | 0.895 |
| Id3     | Hist3h2a | 0.895 |
| Id3     | Acta2    | 0.895 |
| Id1     | Rbl1     | 0.895 |
| Lmnb1   | Rab7     | 0.895 |
| Lmnb1   | Fus      | 0.895 |

|         |         |       |
|---------|---------|-------|
| Gtf2h1  | Zfp111  | 0.895 |
| Ptk2    | Gata4   | 0.895 |
| Tcf12   | Ascl3   | 0.895 |
| Egr2    | Msx2    | 0.895 |
| Birc2   | Khdrbs1 | 0.895 |
| Eya3    | Eya1    | 0.895 |
| Pparg   | Fancd2  | 0.895 |
| Ifrd1   | Msx2    | 0.895 |
| Ube2d1  | Cryge   | 0.895 |
| Bag1    | Bcl2l11 | 0.894 |
| Bach1   | Smarcd3 | 0.894 |
| Mef2a   | Hoxd13  | 0.894 |
| Epc1    | Tfdp1   | 0.894 |
| Itch    | Cflar   | 0.894 |
| Rnh1    | Zdhhc13 | 0.894 |
| Rnh1    | Ttn     | 0.894 |
| Id3     | Psme3   | 0.894 |
| Id1     | Tgfb1i1 | 0.894 |
| Cd2ap   | Sorbs2  | 0.894 |
| Psmb1   | Ptpn13  | 0.894 |
| Usp2    | Myh3    | 0.894 |
| Gtf2h1  | Zscan2  | 0.894 |
| Rab7    | Sun1    | 0.894 |
| Hist2h4 | Zfp292  | 0.894 |
| Hist2h4 | Phf2    | 0.894 |
| Hist2h4 | Taf1b   | 0.894 |
| Zfp354a | Lmx1a   | 0.894 |
| Max     | Hspa1b  | 0.894 |
| Aldoa   | Eif2a   | 0.894 |
| Pparg   | Fyn     | 0.894 |
| Pparg   | Prkcsh  | 0.894 |
| Limk2   | Limk1   | 0.894 |
| Hoxb13  | Dlx5    | 0.894 |
| Tbrg1   | Ttc4    | 0.894 |
| Lef1    | Plagl2  | 0.894 |
| Nrip1   | Nr1h4   | 0.894 |
| Usf1    | Nr1h4   | 0.893 |
| Id3     | Krt15   | 0.893 |
| Gtf2h1  | Dlx5    | 0.893 |
| Sirt1   | Pparg   | 0.893 |
| Pura    | Rplp0   | 0.893 |
| Pclo    | Rapgef4 | 0.893 |
| Irak4   | Il1r1   | 0.893 |
| Egr2    | Ube2n   | 0.893 |
| Egr2    | Psmc3   | 0.893 |
| Eya3    | Neurod1 | 0.893 |

|          |          |       |
|----------|----------|-------|
| Aldoa    | Anxa1    | 0.893 |
| Dynll1   | Krt42    | 0.893 |
| Syn2     | Itpr1    | 0.893 |
| Syn2     | Rps3     | 0.893 |
| Arntl    | Dbp      | 0.893 |
| Gtf3c1   | Hoxa10   | 0.893 |
| Hist3h2a | Ctbp2    | 0.893 |
| Ifrd1    | Hist4h4  | 0.893 |
| Cask     | Ppfia2   | 0.893 |
| Gtf2a1l  | Tle4     | 0.892 |
| Psm4     | Cand2    | 0.892 |
| Psm4     | Hnrnpf   | 0.892 |
| Epc1     | Usf1     | 0.892 |
| Rarg     | Usf1     | 0.892 |
| Gpbp1    | Abt1     | 0.892 |
| Rnh1     | Krt8     | 0.892 |
| Irf8     | Ulk1     | 0.892 |
| Id1      | Hnf4g    | 0.892 |
| Rac1     | Sykb     | 0.892 |
| Lmnb1    | Hist2h4  | 0.892 |
| Gtf2h1   | Kdm5d    | 0.892 |
| Sirt1    | Fos      | 0.892 |
| Rab3d    | Hbb-b1   | 0.892 |
| Pura     | H1f0     | 0.892 |
| Pura     | Arhgap33 | 0.892 |
| Hnf1a    | Hnf4g    | 0.892 |
| Zfp236   | Nr1h4    | 0.892 |
| Egr2     | Cebpa    | 0.892 |
| Pparg    | Smyd1    | 0.892 |
| Pparg    | Cebpb    | 0.892 |
| Ubb      | Krt42    | 0.892 |
| Ubb      | Ttn      | 0.892 |
| Rbpj     | Notch1   | 0.892 |
| Gab1     | Lepr     | 0.892 |
| Casp8    | Flt1     | 0.892 |
| Bag1     | Itch     | 0.891 |
| Bag1     | Krt8     | 0.891 |
| Bach1    | Sf3b2    | 0.891 |
| Bach1    | Sip1     | 0.891 |
| Mef2a    | Dnajb6   | 0.891 |
| Mecp2    | Phf12    | 0.891 |
| Gtf2a1l  | Rnps1    | 0.891 |
| Sorbs1   | Sykb     | 0.891 |
| Sorbs1   | Atxn2    | 0.891 |
| Lifr     | Il6st    | 0.891 |
| Gpbp1    | Irf1     | 0.891 |

|          |          |       |
|----------|----------|-------|
| Gbbp1    | Taf1b    | 0.891 |
| Rnh1     | Prss1    | 0.891 |
| Phb2     | Eef1a2   | 0.891 |
| Gtf2h1   | C1qbp    | 0.891 |
| Gtf2h1   | Med31    | 0.891 |
| Gtf2h1   | Zfp764   | 0.891 |
| Ssbp3    | Lmx1b    | 0.891 |
| Hist2h4  | Phf17    | 0.891 |
| Mtf1     | Cebpd    | 0.891 |
| Mapkapk2 | Phc2     | 0.891 |
| Zfp236   | Neurog2  | 0.891 |
| Pitx1    | Pin1     | 0.891 |
| Egr2     | Gsc      | 0.891 |
| Egr2     | Ctnn     | 0.891 |
| Mixl1    | Emx2     | 0.891 |
| Pparg    | Irak1    | 0.891 |
| Pparg    | Ctcf     | 0.891 |
| Pparg    | Csf1r    | 0.891 |
| Ncoa6    | Rxra     | 0.891 |
| Ubb      | Gria1    | 0.891 |
| Casp8    | Fas      | 0.891 |
| Fasn     | Lepr     | 0.891 |
| Rara     | Ep300    | 0.89  |
| Bach1    | Kat2b    | 0.89  |
| Mef2a    | Col3a1   | 0.89  |
| Gtf2a1l  | Eya3     | 0.89  |
| Hdac4    | Ifrd1    | 0.89  |
| Id1      | Phb2     | 0.89  |
| Rev1     | Polh     | 0.89  |
| Rps6kb1  | Mtor     | 0.89  |
| Hist2h4  | Hist3h2a | 0.89  |
| Hist2h4  | Pdlim4   | 0.89  |
| Pura     | Eef1a2   | 0.89  |
| Tle1     | Msx2     | 0.89  |
| Pias3    | Taf5     | 0.89  |
| Prlr     | Agap2    | 0.89  |
| Gnao1    | Ldha     | 0.89  |
| Birc2    | Malt1    | 0.89  |
| Birc2    | Chuk     | 0.89  |
| Mixl1    | Pou6f1   | 0.89  |
| Aldoa    | Ipo9     | 0.89  |
| Aldoa    | Acta1    | 0.89  |
| Med1     | Med16    | 0.89  |
| Pparg    | Usp8     | 0.89  |
| Pparg    | Srebf1   | 0.89  |
| Pparg    | Flt1     | 0.89  |

|         |         |       |
|---------|---------|-------|
| Fancd2  | Ngfr    | 0.89  |
| Fancd2  | Cdh1    | 0.89  |
| Dynll1  | Hspa9   | 0.89  |
| Syn2    | Usp8    | 0.89  |
| Rapgef4 | Rims2   | 0.89  |
| Rela    | Jun     | 0.89  |
| Ubqln2  | Eif2a   | 0.89  |
| Ptma    | Cul7    | 0.89  |
| Tmem115 | Tab1    | 0.89  |
| Lef1    | Hoxa13  | 0.89  |
| Fasn    | H2afx   | 0.89  |
| Foxh1   | Hoxa10  | 0.89  |
| Syvn1   | Stx6    | 0.889 |
| Mef2a   | Mef2c   | 0.889 |
| Gtf2a1l | Stat5b  | 0.889 |
| Pasma4  | Atp2a2  | 0.889 |
| Shc1    | Stat3   | 0.889 |
| Gpbp1   | Hnf1b   | 0.889 |
| Rnh1    | Sfn     | 0.889 |
| Id3     | Kdm4b   | 0.889 |
| Id3     | Krt42   | 0.889 |
| Id1     | Tcf12   | 0.889 |
| Lmo2    | Lmo3    | 0.889 |
| Traf6   | Rela    | 0.889 |
| Rab7    | Hsp90b1 | 0.889 |
| Rps6kb1 | Rptor   | 0.889 |
| Hist2h4 | Tsc22d3 | 0.889 |
| Egr2    | Stat5a  | 0.889 |
| Egr2    | Nfkbia  | 0.889 |
| Egr2    | Pparg   | 0.889 |
| Tle4    | Lef1    | 0.889 |
| Eya3    | Neurog1 | 0.889 |
| Mph1    | Cbx7    | 0.889 |
| Med1    | Smad4   | 0.889 |
| Pparg   | Casp3   | 0.889 |
| Capn2   | Metap2  | 0.889 |
| Ifrd1   | Mef2c   | 0.889 |
| Ppp1cc  | Trp53   | 0.889 |
| Mecp2   | Barx2   | 0.888 |
| Mecp2   | Sfpi1   | 0.888 |
| Carm1   | Mef2c   | 0.888 |
| Als2    | Atp1a1  | 0.888 |
| Als2    | Gria1   | 0.888 |
| Rnh1    | Ldha    | 0.888 |
| Pcmt1   | Ppara   | 0.888 |
| Id3     | Zfp277  | 0.888 |

|         |           |       |
|---------|-----------|-------|
| Id1     | Med31     | 0.888 |
| Id1     | Tbx21     | 0.888 |
| Cd2ap   | Map2k7    | 0.888 |
| Rac1    | Lrp1      | 0.888 |
| Sod1    | Psmc3     | 0.888 |
| Lmo2    | Lmo4      | 0.888 |
| Cdk5    | Ccnh      | 0.888 |
| Egr2    | Pten      | 0.888 |
| Mixl1   | Olig1     | 0.888 |
| Nbr1    | Ubb       | 0.888 |
| Nefl    | Myo5a     | 0.888 |
| Notch2  | Sri       | 0.888 |
| Pparg   | Hist2h2bb | 0.888 |
| Pparg   | Junb      | 0.888 |
| Pparg   | Flt3      | 0.888 |
| Ubb     | Calm2     | 0.888 |
| Kif5a   | Kcnc1     | 0.888 |
| Dynll1  | Actn4     | 0.888 |
| Eef1a1  | Krt42     | 0.888 |
| Casp8   | Msx2      | 0.888 |
| Fas     | Irf1      | 0.888 |
| Mef2a   | Rfxank    | 0.887 |
| Als2    | Kcnd2     | 0.887 |
| Epc1    | Mllt1     | 0.887 |
| Ncstn   | Rer1      | 0.887 |
| Rnh1    | Hist1h3f  | 0.887 |
| Id3     | Ywhaq     | 0.887 |
| Id3     | Rps27a    | 0.887 |
| Irf8    | Rer1      | 0.887 |
| Hnf1b   | Hnf1a     | 0.887 |
| Nkx2-5  | Hand1     | 0.887 |
| Traip   | Optn      | 0.887 |
| Hist2h4 | Foxp1     | 0.887 |
| Hist2h4 | Hdac5     | 0.887 |
| Atf4    | Fos       | 0.887 |
| Mtf2    | Mms19     | 0.887 |
| Zfp236  | Cebpd     | 0.887 |
| Birc2   | Tirap     | 0.887 |
| Rb1     | Cebpa     | 0.887 |
| Hbb-b1  | Cfl1      | 0.887 |
| Eef1a1  | Acta1     | 0.887 |
| Zfp277  | Lhx2      | 0.887 |
| Hoxb13  | Dlx1      | 0.887 |
| Ltbr    | Ticam1    | 0.887 |
| Bad     | Wasf1     | 0.886 |
| Mef2a   | Zeb2      | 0.886 |



|         |         |       |
|---------|---------|-------|
| Usf1    | Clock   | 0.886 |
| Rnh1    | S100a4  | 0.886 |
| Atf7ip  | Ccnh    | 0.886 |
| Id3     | Polr1a  | 0.886 |
| Cdk5    | Nefl    | 0.886 |
| Slc2a4  | Daxx    | 0.886 |
| Lbxcor1 | Tle1    | 0.886 |
| Hist2h4 | Ube2i   | 0.886 |
| Egr2    | Fancd2  | 0.886 |
| Eya3    | Rbl1    | 0.886 |
| Nbr1    | Ctnn    | 0.886 |
| Aldoa   | Arrb1   | 0.886 |
| Pparg   | Itpr1   | 0.886 |
| Ubb     | Krt76   | 0.886 |
| Fancd2  | Reg1    | 0.886 |
| Klrb1c  | Nr5a2   | 0.886 |
| Hspa1b  | Ppp1cc  | 0.886 |
| Zfp277  | Zfp592  | 0.886 |
| Hoxa6   | Pknox2  | 0.886 |
| Tceb1   | Wsb1    | 0.886 |
| Tbrg1   | Huwe1   | 0.886 |
| Mef2a   | Pknox1  | 0.885 |
| Mecp2   | Rbl2    | 0.885 |
| Mecp2   | Srebf1  | 0.885 |
| Psm4    | Tfrc    | 0.885 |
| Gabra1  | Gabrg2  | 0.885 |
| Gbbp1   | Sh3gl1  | 0.885 |
| Rnh1    | Ptpn13  | 0.885 |
| Rnh1    | Myo5a   | 0.885 |
| Rnh1    | Spata24 | 0.885 |
| Id3     | Dot1l   | 0.885 |
| Psm1    | Hnrnpf  | 0.885 |
| Lmo2    | Zfp446  | 0.885 |
| Six6    | Vax2    | 0.885 |
| Trps1   | Zfp236  | 0.885 |
| Wdr1    | Wdr61   | 0.885 |
| Tcf12   | Pdcd6   | 0.885 |
| Skp1a   | Cul7    | 0.885 |
| Mtf2    | Rbl2    | 0.885 |
| Egr2    | Hoxc4   | 0.885 |
| Mixl1   | Trp73   | 0.885 |
| Ncor2   | Ncor1   | 0.885 |
| Nbr1    | Ulk1    | 0.885 |
| Aldoa   | Naca    | 0.885 |
| Tirap   | Ticam1  | 0.885 |
| Sf3b2   | Cblb    | 0.885 |

|         |            |       |
|---------|------------|-------|
| Ubb     | Tubb5      | 0.885 |
| Suz12   | E130012A19 | 0.885 |
| Casp8   | Ngfr       | 0.885 |
| Mef2a   | Creb1      | 0.884 |
| Map2k4  | Skil       | 0.884 |
| Lifr    | Cntf       | 0.884 |
| Zfp513  | Zfp473     | 0.884 |
| Id3     | Cops4      | 0.884 |
| Tcerg1  | Sox15      | 0.884 |
| Gtf2h1  | Eya3       | 0.884 |
| Sfrs3   | Eef1a2     | 0.884 |
| Rab3d   | Gnb2l1     | 0.884 |
| Hist2h4 | Olig2      | 0.884 |
| Pura    | Cdk2       | 0.884 |
| Ahi1    | Krt73      | 0.884 |
| Tle1    | Phf12      | 0.884 |
| Zfp354a | Ankrd32    | 0.884 |
| Slc11a1 | Keap1      | 0.884 |
| Egr2    | Stat1      | 0.884 |
| Egr2    | Atxn3      | 0.884 |
| Bcl10   | Peli2      | 0.884 |
| Ezh1    | Suz12      | 0.884 |
| Aldoa   | Plec       | 0.884 |
| Aldoa   | Psmc3      | 0.884 |
| Atg16l1 | Rab33b     | 0.884 |
| Zfp473  | Hoxd3      | 0.884 |
| Pparg   | Git1       | 0.884 |
| Phc3    | Ppp2ca     | 0.884 |
| Ubb     | Med14      | 0.884 |
| H1f0    | Psme3      | 0.884 |
| Cdk1    | Ccna2      | 0.884 |
| Arhgap1 | Pafah1b1   | 0.884 |
| Ifrd1   | E2f1       | 0.884 |
| Daxx    | Sumo1      | 0.884 |
| Itpr3   | Cav1       | 0.884 |
| Nrip1   | Sap18      | 0.884 |
| VeZF1   | Phf12      | 0.884 |
| Bach1   | Prdm16     | 0.883 |
| Mecp2   | Ncor1      | 0.883 |
| PsmA4   | Flnc       | 0.883 |
| Sorbs1  | Itn1       | 0.883 |
| Usf1    | Hnf1b      | 0.883 |
| Id1     | Map2k1     | 0.883 |
| Id1     | Nkx2-2     | 0.883 |
| Usp2    | Igf1r      | 0.883 |
| Hist2h4 | Hist2h2be  | 0.883 |

|         |           |       |
|---------|-----------|-------|
| Tle1    | Rbl2      | 0.883 |
| Tle1    | Hdac3     | 0.883 |
| Nr1i2   | Nrip1     | 0.883 |
| Egr2    | Fyn       | 0.883 |
| Egr2    | Itpr1     | 0.883 |
| Egr2    | Runx2     | 0.883 |
| Eya3    | Polr2i    | 0.883 |
| Rbck1   | Eya1      | 0.883 |
| Aldoa   | Irf5      | 0.883 |
| Aldoa   | Actn1     | 0.883 |
| Pparg   | Uimc1     | 0.883 |
| Il17ra  | Traf3ip2  | 0.883 |
| Capn2   | Fert2     | 0.883 |
| Capn2   | Blk       | 0.883 |
| Syn2    | Hnrnpab   | 0.883 |
| Bag1    | Ppp2ca    | 0.882 |
| Bag1    | Atxn3     | 0.882 |
| Mapkbp1 | Spag9     | 0.882 |
| Rnh1    | Cct6a     | 0.882 |
| Usp2    | Irf5      | 0.882 |
| Usp2    | Zfp110    | 0.882 |
| Lmnb1   | Rab5a     | 0.882 |
| Pura    | Nrip2     | 0.882 |
| Hnf1a   | Irf7      | 0.882 |
| Slc11a1 | Gria3     | 0.882 |
| Pias3   | Srebf1    | 0.882 |
| Mtf1    | Hoxd3     | 0.882 |
| Gnao1   | Gng2      | 0.882 |
| Egr2    | Usp8      | 0.882 |
| Egr2    | Sh3gl2    | 0.882 |
| Ncam1   | Apbb1     | 0.882 |
| Ncam1   | Clu       | 0.882 |
| Stam2   | Usp8      | 0.882 |
| Aldoa   | Syn1      | 0.882 |
| Nfkbia  | Ikbkg     | 0.882 |
| Atg16l1 | Gria3     | 0.882 |
| Pparg   | Dnmt1     | 0.882 |
| Pparg   | Eif2c2    | 0.882 |
| Pparg   | Gli3      | 0.882 |
| Pparg   | Cebpa     | 0.882 |
| Pparg   | Mdm4      | 0.882 |
| Mafk    | Mll2      | 0.882 |
| Fancd2  | Was       | 0.882 |
| Fancd2  | Prkcsh    | 0.882 |
| Rela    | Ctnnb1    | 0.882 |
| Srf     | Hist2h2be | 0.882 |

|         |          |       |
|---------|----------|-------|
| Rabl4   | Hspb11   | 0.882 |
| Csnk1e  | Arntl    | 0.881 |
| Bag1    | Ldha     | 0.881 |
| Gtf2a1l | Irf7     | 0.881 |
| Shc1    | Ntrk2    | 0.881 |
| Sorbs1  | Arhgap33 | 0.881 |
| Epc1    | Scmh1    | 0.881 |
| Psmb1   | Nap1l4   | 0.881 |
| Usp2    | Mc4r     | 0.881 |
| Usp2    | Sykb     | 0.881 |
| Usp2    | Sh3gl2   | 0.881 |
| Lmnb1   | Sf3b1    | 0.881 |
| Gtf2h1  | Hoxb4    | 0.881 |
| Gtf2h1  | Rnf14    | 0.881 |
| Rai14   | Polr1a   | 0.881 |
| Hnf1a   | Nr2f6    | 0.881 |
| Hnf1a   | Neurog2  | 0.881 |
| Nr1i2   | AW146020 | 0.881 |
| Pias3   | Spata24  | 0.881 |
| Wdr61   | Ctr9     | 0.881 |
| Sp7     | Dlx1     | 0.881 |
| Mtf1    | Mafk     | 0.881 |
| Mtf1    | Sertad1  | 0.881 |
| Egr2    | Irf5     | 0.881 |
| Egr2    | Tax1bp1  | 0.881 |
| Egr2    | Cebpb    | 0.881 |
| Cyld    | Irf5     | 0.881 |
| Aldoa   | Irf7     | 0.881 |
| Kdm4c   | Nr1h4    | 0.881 |
| Ubb     | Acta2    | 0.881 |
| Fancd2  | Msx2     | 0.881 |
| Fancd2  | Flt1     | 0.881 |
| Capn2   | Elk1     | 0.881 |
| Capn2   | Pea15a   | 0.881 |
| Syn2    | Atp5a1   | 0.881 |
| Syn2    | Ppfia2   | 0.881 |
| Nfe2l2  | Fos      | 0.881 |
| Ifrd1   | Gli2     | 0.881 |
| Casp8   | Gli3     | 0.881 |
| Bag1    | Atf3     | 0.88  |
| Bach1   | Ddx5     | 0.88  |
| Bach1   | Runx2    | 0.88  |
| Rnh1    | Ipo9     | 0.88  |
| Atf7ip  | Cdk7     | 0.88  |
| Id3     | Krt2     | 0.88  |
| Bbs4    | Fez1     | 0.88  |

|         |           |       |
|---------|-----------|-------|
| Hist2h4 | Tle6      | 0.88  |
| Barx2   | Creb1     | 0.88  |
| Rai14   | Ivns1abp  | 0.88  |
| Gabrb2  | Usp14     | 0.88  |
| Zfp236  | Tox3      | 0.88  |
| Egr2    | Dlx5      | 0.88  |
| Eya3    | Tbx21     | 0.88  |
| Sf3b2   | Klf10     | 0.88  |
| Med1    | Tbp       | 0.88  |
| Pparg   | Was       | 0.88  |
| Pparg   | Aes       | 0.88  |
| Pparg   | Mycn      | 0.88  |
| Ubb     | Med16     | 0.88  |
| Ubb     | Gsn       | 0.88  |
| Tek     | Irs2      | 0.88  |
| Fancd2  | Mc4r      | 0.88  |
| Fancd2  | Psmc3     | 0.88  |
| Syn2    | Git1      | 0.88  |
| Pcna    | Cdk2      | 0.88  |
| Ptma    | Jund      | 0.88  |
| Tbrg1   | Epas1     | 0.88  |
| Fasn    | Sap18     | 0.88  |
| Fasn    | Vav1      | 0.88  |
| Nkd2    | Zscan2    | 0.88  |
| Zfp263  | Sp7       | 0.879 |
| Mef2a   | Hoxa13    | 0.879 |
| Gtf2a1l | Sp7       | 0.879 |
| Sorbs3  | Kndc1     | 0.879 |
| Clip1   | Pafah1b1  | 0.879 |
| Als2    | Nrcam     | 0.879 |
| Rnh1    | Hist1h2ai | 0.879 |
| Id1     | Kat2b     | 0.879 |
| Cd2ap   | Dnajb6    | 0.879 |
| Gtf2h1  | Hcls1     | 0.879 |
| Taf3    | Hmga2     | 0.879 |
| Traf6   | Ywhaz     | 0.879 |
| Pura    | Sorbs2    | 0.879 |
| Zfp354a | Lmo3      | 0.879 |
| Otx2    | Hoxb13    | 0.879 |
| Slc11a1 | Gria2     | 0.879 |
| Slc11a1 | Sf3b1     | 0.879 |
| Mll1    | Hist4h4   | 0.879 |
| Otud7b  | Ltbr      | 0.879 |
| Tmf1    | Cflar     | 0.879 |
| Nbr1    | Sh3gl2    | 0.879 |
| Ube2e3  | Cul7      | 0.879 |

|          |          |       |
|----------|----------|-------|
| Notch2   | Aph1a    | 0.879 |
| Notch2   | Cdh1     | 0.879 |
| Ubb      | Tubb2a   | 0.879 |
| Robo1    | Slit3    | 0.879 |
| H1f0     | Nr3c1    | 0.879 |
| H1f0     | Atxn2    | 0.879 |
| Dynll1   | Hsp90aa1 | 0.879 |
| Syn2     | Lrrk2    | 0.879 |
| Grb10    | Irs2     | 0.879 |
| Sun1     | Syne2    | 0.879 |
| Ubqln2   | Telo2    | 0.879 |
| Ubqln2   | Psmc5    | 0.879 |
| Hhex     | Sox8     | 0.879 |
| Mapk8ip1 | Tab1     | 0.879 |
| Cebpa    | Psmc10   | 0.879 |
| Mecp2    | Polr1a   | 0.878 |
| Clip1    | Iqgap1   | 0.878 |
| Lifr     | Ctf2     | 0.878 |
| Ubtf     | Ctcf     | 0.878 |
| Irf8     | Cdh1     | 0.878 |
| Id1      | Trps1    | 0.878 |
| Cd2ap    | Atm      | 0.878 |
| Psmb1    | Hnrnpm   | 0.878 |
| Tcerg1   | Phf17    | 0.878 |
| Atp6v1a  | Actn1    | 0.878 |
| Rab7     | Sfn      | 0.878 |
| Hist2h4  | Dnmt1    | 0.878 |
| Pura     | Tgif1    | 0.878 |
| Pura     | Psmc10   | 0.878 |
| Max      | Ppp1r9b  | 0.878 |
| Mtf2     | Ezh1     | 0.878 |
| Dlg3     | Dlg1     | 0.878 |
| Zfp236   | Hoxa1    | 0.878 |
| Ezh1     | Aebp2    | 0.878 |
| Ppard    | Pawr     | 0.878 |
| Pparg    | Rbl2     | 0.878 |
| Pparg    | Wdtdc1   | 0.878 |
| Ubb      | Try10    | 0.878 |
| Ubb      | Krt78    | 0.878 |
| Blnk     | Metap2   | 0.878 |
| Lmb1     | Eef1a2   | 0.878 |
| Dvl1     | Musk     | 0.877 |
| Zfp263   | Cdx1     | 0.877 |
| Bag1     | Syvn1    | 0.877 |
| Bag1     | Barx2    | 0.877 |
| Bach1    | Cops5    | 0.877 |

|          |          |       |
|----------|----------|-------|
| Mef2a    | Myocd    | 0.877 |
| Psm4     | Psm4     | 0.877 |
| Sorbs3   | Mdk      | 0.877 |
| Sorbs1   | Hck      | 0.877 |
| Pik3r2   | Gab2     | 0.877 |
| Hist1h1e | Cbx5     | 0.877 |
| Epc1     | Mapkapk2 | 0.877 |
| Rad51    | Olig1    | 0.877 |
| Cited4   | Hoxd3    | 0.877 |
| Rnh1     | Mms19    | 0.877 |
| Id1      | Dot1l    | 0.877 |
| Rev1     | Polk     | 0.877 |
| Rev1     | Mad2l2   | 0.877 |
| Usp2     | Cflar    | 0.877 |
| Usp2     | Tbk1     | 0.877 |
| Tcf4     | Hand2    | 0.877 |
| Hand1    | Tcf12    | 0.877 |
| Rab7     | Gm5414   | 0.877 |
| Atf4     | Fam175b  | 0.877 |
| Slc11a1  | Ntrk1    | 0.877 |
| Efs      | Clybl    | 0.877 |
| Sox2     | Hoxc4    | 0.877 |
| Egr2     | Irak1    | 0.877 |
| Mixl1    | Eya1     | 0.877 |
| Aldoa    | Dynll1   | 0.877 |
| Pparg    | Thrb     | 0.877 |
| Pparg    | Pten     | 0.877 |
| Pparg    | Rhoa     | 0.877 |
| Pparg    | Uchl1    | 0.877 |
| Pparg    | Rer1     | 0.877 |
| Phc3     | H3f3a    | 0.877 |
| Ubb      | Trim27   | 0.877 |
| H1f0     | H1       | 0.877 |
| H1f0     | Suz12    | 0.877 |
| Syn2     | Arhgap33 | 0.877 |
| Hist3h2a | Lass2    | 0.877 |
| Casp8    | Tbk1     | 0.877 |
| Bad      | Gck      | 0.876 |
| Bag1     | Foxp1    | 0.876 |
| Bag1     | Fos      | 0.876 |
| Bach1    | Gjb6     | 0.876 |
| Syvn1    | Rer1     | 0.876 |
| Map2k6   | Mib2     | 0.876 |
| Als2     | Grin2a   | 0.876 |
| Als2     | Actn2    | 0.876 |
| Gppb1    | Kat2b    | 0.876 |

|         |           |       |
|---------|-----------|-------|
| Cited4  | Gmeb1     | 0.876 |
| Meis2   | Pbx4      | 0.876 |
| Id1     | Tcf4      | 0.876 |
| Usp2    | Junb      | 0.876 |
| Sod1    | Cttn      | 0.876 |
| Pura    | Ccne1     | 0.876 |
| Ahi1    | Krt76     | 0.876 |
| Egr2    | Lyn       | 0.876 |
| Egr2    | Gli3      | 0.876 |
| Anapc7  | Crem      | 0.876 |
| Tmf1    | Phf20     | 0.876 |
| Aldoa   | Krt16     | 0.876 |
| Aldoa   | Trim28    | 0.876 |
| Aldoa   | Hspa2     | 0.876 |
| Pparg   | Skil      | 0.876 |
| Pparg   | Hgs       | 0.876 |
| Irak1   | Reg1      | 0.876 |
| Fancd2  | Hist2h2bb | 0.876 |
| Fancd2  | Gli3      | 0.876 |
| Fancd2  | Rer1      | 0.876 |
| Cdk1    | Ppp1ca    | 0.876 |
| Tceb2   | Nrbp1     | 0.876 |
| Gab1    | Csn2      | 0.876 |
| Ksr1    | Mark3     | 0.875 |
| Bag1    | Usp9x     | 0.875 |
| Bag1    | Itpr1     | 0.875 |
| Bag1    | Hhex      | 0.875 |
| Mef2a   | Pex6      | 0.875 |
| Mef2a   | Ifrd1     | 0.875 |
| Mecp2   | Mms19     | 0.875 |
| Gtf2a1l | Vax2      | 0.875 |
| Epc1    | Cbx6      | 0.875 |
| Trim26  | Kdm6b     | 0.875 |
| Rarg    | Nr1h4     | 0.875 |
| Gpbp1   | Cited2    | 0.875 |
| Gpbp1   | Sertad1   | 0.875 |
| Stk38   | Mtf2      | 0.875 |
| Rnh1    | Actn4     | 0.875 |
| Id1     | Tle6      | 0.875 |
| Rac1    | Akap9     | 0.875 |
| Usp2    | Prkcsh    | 0.875 |
| Zfp354a | Lmo1      | 0.875 |
| Hnf1a   | Tlx1      | 0.875 |
| Pias3   | Pparg     | 0.875 |
| Egr2    | Ppp2cb    | 0.875 |
| Egr2    | Dlg4      | 0.875 |



|         |             |       |
|---------|-------------|-------|
| Eya3    | Pbx2        | 0.875 |
| Sf3b2   | Smarcd3     | 0.875 |
| Pparg   | Nf1         | 0.875 |
| Pparg   | Psmc3       | 0.875 |
| Pparg   | Vdac1       | 0.875 |
| H1f0    | Uchl1       | 0.875 |
| Fancd2  | Ctnn        | 0.875 |
| Cdk1    | Ccnb1       | 0.875 |
| Suz12   | Iqgap1      | 0.875 |
| Numb    | Ctnna1      | 0.875 |
| Tceb1   | Nrbp1       | 0.875 |
| Cdk4    | Cebpa       | 0.875 |
| Gab1    | Fos         | 0.875 |
| Mapk7   | Nod2        | 0.875 |
| Foxh1   | Prdm16      | 0.875 |
| Cit     | Rac1        | 0.874 |
| Bag1    | Snap25      | 0.874 |
| Bag1    | Hdac6       | 0.874 |
| Bag1    | Ppp1ca      | 0.874 |
| Mecp2   | Tle6        | 0.874 |
| Mecp2   | Pdx1        | 0.874 |
| Gtf2a1l | Tsc22d3     | 0.874 |
| Als2    | Gria3       | 0.874 |
| Usf1    | Pitx2       | 0.874 |
| Gpbp1   | Tceb3       | 0.874 |
| Cited4  | Polr1b      | 0.874 |
| Rnh1    | 2210010C04l | 0.874 |
| Rnh1    | Lox         | 0.874 |
| Id3     | Rsrc1       | 0.874 |
| Cd2ap   | Iqgap1      | 0.874 |
| Sod1    | Hsp90aa1    | 0.874 |
| Lmn1    | Sfn         | 0.874 |
| Gtf2h1  | Tle6        | 0.874 |
| Traf6   | Stat3       | 0.874 |
| Rab3d   | Slc25a3     | 0.874 |
| App     | Dlg1        | 0.874 |
| Hnf1a   | Asb15       | 0.874 |
| Slc11a1 | Fau         | 0.874 |
| Max     | Cdkn2a      | 0.874 |
| Mtf2    | Srebf1      | 0.874 |
| Egr2    | Reg1        | 0.874 |
| Cenpv   | Ldhd        | 0.874 |
| Aldoa   | Irak1       | 0.874 |
| Smurf1  | Map3k2      | 0.874 |
| Med1    | Runx1t1     | 0.874 |
| Ppard   | Nr1i3       | 0.874 |

|        |             |       |
|--------|-------------|-------|
| Kdm4c  | E2f1        | 0.874 |
| Phc3   | E2f6        | 0.874 |
| Tek    | Csf1r       | 0.874 |
| Syn2   | Gab2        | 0.874 |
| Foxh1  | Olig1       | 0.874 |
| Fau    | Gria3       | 0.874 |
| Ksr1   | Brap        | 0.873 |
| Bag1   | Ywhag       | 0.873 |
| Mef2a  | Sf3b2       | 0.873 |
| Mef2a  | Rnf111      | 0.873 |
| Map2k6 | Malt1       | 0.873 |
| Mecp2  | Xpo1        | 0.873 |
| Psm4   | Nap1l4      | 0.873 |
| Epha2  | 2210010C04l | 0.873 |
| Epc1   | Sertad1     | 0.873 |
| Usf1   | Tcf12       | 0.873 |
| Gpbp1  | Gmn         | 0.873 |
| Rad51  | Fancd2      | 0.873 |
| Rad51  | Atxn2       | 0.873 |
| Rnh1   | Atp2a2      | 0.873 |
| Id2    | Trim27      | 0.873 |
| Id3    | Tcf4        | 0.873 |
| Irf8   | Flt3        | 0.873 |
| Psmb1  | Lox         | 0.873 |
| Psmb1  | Tfrc        | 0.873 |
| Usp2   | Stam2       | 0.873 |
| Gtf2h1 | Med21       | 0.873 |
| Gtf2h1 | Pbx4        | 0.873 |
| Gtf2h1 | AW146020    | 0.873 |
| Tcf12  | Cops6       | 0.873 |
| Tcf12  | Hist3h2a    | 0.873 |
| Pias3  | Gtf2b       | 0.873 |
| Inadl  | Grin2c      | 0.873 |
| Mapt   | Egr2        | 0.873 |
| Mtf1   | Hoxa2       | 0.873 |
| Mtf2   | Bclaf1      | 0.873 |
| Egr2   | Rhoa        | 0.873 |
| Egr2   | Mycn        | 0.873 |
| Tmf1   | Myog        | 0.873 |
| Eya3   | Cnot8       | 0.873 |
| Nbr1   | Flt3        | 0.873 |
| Cyld   | Casp8       | 0.873 |
| Aldoa  | Hgs         | 0.873 |
| Aldoa  | Hspa9       | 0.873 |
| Tirap  | Ptk2b       | 0.873 |
| Ncoa6  | Hist3h2a    | 0.873 |

|          |            |       |
|----------|------------|-------|
| Ncoa6    | Sf3b1      | 0.873 |
| Mapk1    | Ctnn       | 0.873 |
| Sf3b4    | 2500003M1C | 0.873 |
| Srf      | Tbl1x      | 0.873 |
| Ptrf     | Eif3e      | 0.873 |
| Il6st    | Cntf       | 0.873 |
| Fasn     | Gab2       | 0.873 |
| Bag1     | Eif2c2     | 0.872 |
| Syvn1    | Aph1b      | 0.872 |
| Mef2a    | Bahd1      | 0.872 |
| Map2k6   | Tmem115    | 0.872 |
| Mecp2    | Kat5       | 0.872 |
| Sorbs3   | Rabgef1    | 0.872 |
| Usf1     | Notch1     | 0.872 |
| Rnh1     | Pkd1       | 0.872 |
| Rnh1     | Nphp3      | 0.872 |
| Rnh1     | Ankhd1     | 0.872 |
| Id3      | Tcf12      | 0.872 |
| Sod1     | Keap1      | 0.872 |
| Gtf2h1   | Hif1an     | 0.872 |
| Gtf2h1   | Foxn2      | 0.872 |
| Gtf2h1   | Mms19      | 0.872 |
| Gtf2h1   | Supt4h1    | 0.872 |
| Gtf2h1   | Zfp277     | 0.872 |
| Gtf2h1   | Asb1       | 0.872 |
| Cdk5     | Cdk2       | 0.872 |
| Wbp11    | Eif2a      | 0.872 |
| Hist2h4  | Hdac3      | 0.872 |
| Pura     | Grip1      | 0.872 |
| Zfp354a  | Srf        | 0.872 |
| Pias3    | Ube2i      | 0.872 |
| Pias3    | Hdac6      | 0.872 |
| Mapt     | Myh3       | 0.872 |
| Mapt     | Rnf19a     | 0.872 |
| Egr2     | Birc3      | 0.872 |
| Egr2     | Nfkb1      | 0.872 |
| Egr2     | Rer1       | 0.872 |
| Egr2     | Hras1      | 0.872 |
| Tmf1     | Tnk2       | 0.872 |
| Nbr1     | Cdh1       | 0.872 |
| Pparg    | Cdk7       | 0.872 |
| Ncoa6    | Phc2       | 0.872 |
| Fancd2   | Ulk1       | 0.872 |
| Ptpn6    | Tcrb       | 0.872 |
| Hist3h2a | Hdac10     | 0.872 |
| Casp8    | Junb       | 0.872 |

|          |          |       |
|----------|----------|-------|
| Fbxw8    | Rbx1     | 0.871 |
| Bad      | Prkaca   | 0.871 |
| Bag1     | Park2    | 0.871 |
| Map2k4   | Map2k1   | 0.871 |
| Psm4     | Hnrnp1   | 0.871 |
| Sorbs3   | Brp      | 0.871 |
| Sorbs1   | Grb10    | 0.871 |
| Usf1     | Ubtf     | 0.871 |
| Cited4   | Cebp     | 0.871 |
| Vps16    | Vps45    | 0.871 |
| Irf8     | Ctn      | 0.871 |
| Ss18     | Atf2     | 0.871 |
| Psm7     | Zfand2a  | 0.871 |
| Lmnb1    | Serbp1   | 0.871 |
| Itgb1bp2 | Chordc1  | 0.871 |
| Mtf2     | Eil      | 0.871 |
| Egr2     | Stat3    | 0.871 |
| Egr2     | Cacna1c  | 0.871 |
| Egr2     | Myd88    | 0.871 |
| Pcgf1    | Hist3h2a | 0.871 |
| Eya3     | Med31    | 0.871 |
| Nbr1     | Ntrk1    | 0.871 |
| Aldoa    | Eif2c2   | 0.871 |
| Tcp1     | Calm1    | 0.871 |
| Pparg    | Satb2    | 0.871 |
| Ubb      | Fbxo2    | 0.871 |
| Kif5a    | Kif5b    | 0.871 |
| Fancd2   | Eif2c2   | 0.871 |
| Foxp1    | Phf2     | 0.871 |
| Suz12    | Ldha     | 0.871 |
| Ifrd1    | Cebpb    | 0.871 |
| Ifrd1    | Runx2    | 0.871 |
| Zfp277   | Rnf14    | 0.871 |
| Mapk7    | Pgr      | 0.871 |
| Tbp      | Taf1b    | 0.871 |
| VeZF1    | Hist3    | 0.871 |
| Csnk1e   | Per1     | 0.87  |
| Bag1     | Stub1    | 0.87  |
| Bag1     | Ppp3ca   | 0.87  |
| Bach1    | Pex6     | 0.87  |
| Syvn1    | Ppp1ca   | 0.87  |
| Mef2a    | Lef1     | 0.87  |
| Psm4     | Krt78    | 0.87  |
| Shc1     | Flt1     | 0.87  |
| Epc1     | Phc3     | 0.87  |
| Gppb1    | Pias1    | 0.87  |

|          |          |       |
|----------|----------|-------|
| Rad51    | Map2k7   | 0.87  |
| Cited4   | Rbl2     | 0.87  |
| Cited4   | Ell      | 0.87  |
| Arhgef2  | Ppp1r9b  | 0.87  |
| Per1     | Clock    | 0.87  |
| Cd2ap    | Psme3    | 0.87  |
| Psmb1    | Glud1    | 0.87  |
| Sod1     | Ntrk2    | 0.87  |
| Lmo2     | Lmo1     | 0.87  |
| Gtf2h1   | Ciita    | 0.87  |
| Gtf2h1   | Atf7     | 0.87  |
| Tcfap2a  | Cited2   | 0.87  |
| Zfp354a  | Lhx2     | 0.87  |
| Bcl6     | Rxra     | 0.87  |
| Esr1     | Rela     | 0.87  |
| Dlg3     | Ppp1cc   | 0.87  |
| Egr2     | Hgs      | 0.87  |
| Egr2     | Tardbp   | 0.87  |
| Egr2     | Dlg1     | 0.87  |
| Egr2     | Fos      | 0.87  |
| Tmf1     | Zfp110   | 0.87  |
| Eya3     | Nr3c1    | 0.87  |
| Nbr1     | Irf5     | 0.87  |
| Nbr1     | Fam175b  | 0.87  |
| Prkca    | Ubqln2   | 0.87  |
| Siah2    | Thrb     | 0.87  |
| Siah2    | Spry2    | 0.87  |
| Hsf1     | Irf3     | 0.87  |
| Aldoa    | Usp8     | 0.87  |
| Leo1     | Ctr9     | 0.87  |
| Atg16l1  | Fau      | 0.87  |
| Sf3b2    | Runx2    | 0.87  |
| Notch2   | Dll1     | 0.87  |
| Pparg    | Hsp90aa1 | 0.87  |
| Pparg    | Arid1b   | 0.87  |
| Ubb      | Pi4ka    | 0.87  |
| Ubb      | Myo5a    | 0.87  |
| Polr1e   | Ctcf     | 0.87  |
| Fancd2   | Ctcf     | 0.87  |
| Syn2     | Tubb2a   | 0.87  |
| Gtf3c1   | Foxh1    | 0.87  |
| Suz12    | Psmc2    | 0.87  |
| Hist3h2a | Myb      | 0.87  |
| Ubqln2   | Ldha     | 0.87  |
| Casp8    | Rer1     | 0.87  |
| Bag1     | Rad9     | 0.869 |

|         |          |       |
|---------|----------|-------|
| Map2k6  | Spag9    | 0.869 |
| Map2k6  | Tab1     | 0.869 |
| Mecp2   | Pparg    | 0.869 |
| Sorbs1  | Snx9     | 0.869 |
| Als2    | Lrp1     | 0.869 |
| Epha2   | Krt79    | 0.869 |
| Rad51   | Sap18    | 0.869 |
| Cited4  | Hoxa1    | 0.869 |
| Cited4  | Zfp592   | 0.869 |
| Ncstn   | Aph1a    | 0.869 |
| Dcx     | Usp9x    | 0.869 |
| Rnh1    | Tubb2a   | 0.869 |
| Per2    | Mll1     | 0.869 |
| Id3     | Trim27   | 0.869 |
| Ssbp2   | Lmo3     | 0.869 |
| Gtf2h1  | Rbl1     | 0.869 |
| Sfrs3   | Lmb1     | 0.869 |
| Apba1   | Ppfia2   | 0.869 |
| Gata4   | Gata6    | 0.869 |
| Traf6   | Trp53    | 0.869 |
| Rps6kb1 | Mlst8    | 0.869 |
| Pura    | Thoc4    | 0.869 |
| Pura    | Nrip1    | 0.869 |
| Pura    | Cdk7     | 0.869 |
| Wdr61   | Leo1     | 0.869 |
| Psen2   | Notch3   | 0.869 |
| Krt8    | Hsp90aa1 | 0.869 |
| Zfp236  | Sertad1  | 0.869 |
| Wasf1   | Gck      | 0.869 |
| Egr2    | Dnmt1    | 0.869 |
| Eya3    | Stat5b   | 0.869 |
| Aldoa   | Snap25   | 0.869 |
| Aldoa   | Krt78    | 0.869 |
| Notch2  | Grin2a   | 0.869 |
| Pparg   | Jak2     | 0.869 |
| Pparg   | Cdh1     | 0.869 |
| Ncoa6   | Scmh1    | 0.869 |
| Ubb     | Taf15    | 0.869 |
| Kif5b   | Kcnc1    | 0.869 |
| H1f0    | Ppp1cc   | 0.869 |
| Dynll1  | Actn1    | 0.869 |
| Syn2    | Rims2    | 0.869 |
| Ube2d1  | Dll1     | 0.869 |
| Casp8   | Prkcsh   | 0.869 |
| Nrip1   | Sirt2    | 0.869 |
| Bag1    | Sfpi1    | 0.868 |

|          |          |       |
|----------|----------|-------|
| Map2k6   | Mapk8ip1 | 0.868 |
| Mecp2    | Atrx     | 0.868 |
| Gtf2a1l  | Tlx1     | 0.868 |
| Sorbs1   | Nck1     | 0.868 |
| Als2     | Kat2b    | 0.868 |
| Rarg     | Atf2     | 0.868 |
| Usf1     | Atf2     | 0.868 |
| Gpbp1    | Clock    | 0.868 |
| Rnh1     | Cryab    | 0.868 |
| Id2      | Atm      | 0.868 |
| Id1      | Foxn2    | 0.868 |
| Pygo1    | Lhx9     | 0.868 |
| Usp2     | Ndfip1   | 0.868 |
| Lmnb1    | Dnmt1    | 0.868 |
| Lmnb1    | Ttn      | 0.868 |
| Crkl     | Inpp5d   | 0.868 |
| Rab3d    | Dnajb1   | 0.868 |
| Pura     | Gab2     | 0.868 |
| Rai14    | Lhx9     | 0.868 |
| Hnf1a    | Spdef    | 0.868 |
| Nr1i2    | Ptpn6    | 0.868 |
| Slc11a1  | Ubb      | 0.868 |
| Ar       | Kdm4c    | 0.868 |
| Dnajb6   | Bahd1    | 0.868 |
| Egr2     | Flt3     | 0.868 |
| Tirap    | Csf1r    | 0.868 |
| Pparg    | Itga5    | 0.868 |
| Pparg    | Dlg4     | 0.868 |
| Kdm4c    | Tbx21    | 0.868 |
| Il1r1    | Il1rap   | 0.868 |
| Irak1    | Myd88    | 0.868 |
| Fancd2   | Pten     | 0.868 |
| Fancd2   | Casp8    | 0.868 |
| Fancd2   | Notch1   | 0.868 |
| Hist3h2a | Sh3gl1   | 0.868 |
| Tbrg1    | Sobp     | 0.868 |
| Bag1     | Mllt3    | 0.867 |
| Bach1    | Ercc3    | 0.867 |
| Syvn1    | Psen2    | 0.867 |
| Syvn1    | Aph1a    | 0.867 |
| Gpbp1    | Zbtb17   | 0.867 |
| Gpbp1    | Myb      | 0.867 |
| Cited4   | Pcmt1    | 0.867 |
| Rnh1     | Rsrc1    | 0.867 |
| Id3      | Shank3   | 0.867 |
| Irf8     | Mdm4     | 0.867 |

|         |          |       |
|---------|----------|-------|
| Cd2ap   | Msl1     | 0.867 |
| Map2k1  | Brap     | 0.867 |
| Gtf2h1  | Pdim4    | 0.867 |
| Traf3   | Otud7b   | 0.867 |
| Rab6    | Rab5a    | 0.867 |
| Hist2h4 | Polr1a   | 0.867 |
| Tle1    | Pdx1     | 0.867 |
| Nrg1    | Brm1     | 0.867 |
| Zfp354a | Hif1an   | 0.867 |
| Nr1i2   | Foxh1    | 0.867 |
| Keap1   | Zbtb16   | 0.867 |
| Esr1    | Stat3    | 0.867 |
| Max     | Ccnb1    | 0.867 |
| Zfp236  | Ncor2    | 0.867 |
| Egr1    | Pin1     | 0.867 |
| Egr2    | Uchl1    | 0.867 |
| Ube2l3  | Rnf31    | 0.867 |
| Hbb-b1  | Csf2rb   | 0.867 |
| Aldoa   | Lox      | 0.867 |
| Sf3b2   | Bmpr2    | 0.867 |
| Srf     | Tfdp1    | 0.867 |
| Ifrd1   | Phf12    | 0.867 |
| Ubqln2  | Eif3e    | 0.867 |
| Ube2d1  | Ube2g2   | 0.867 |
| Mecp2   | Hist3h2a | 0.866 |
| Mecp2   | Ctcf     | 0.866 |
| Shc1    | Gab2     | 0.866 |
| Epc1    | Pcgf2    | 0.866 |
| Gpbp1   | Hoxa9    | 0.866 |
| Rnh1    | Acta2    | 0.866 |
| Id2     | Hmga1    | 0.866 |
| Id3     | Irf7     | 0.866 |
| Ankrd1  | Capn3    | 0.866 |
| Sod1    | Pkm2     | 0.866 |
| Gtf2h1  | Otx2     | 0.866 |
| Gtf2h1  | Mafk     | 0.866 |
| Tcf4    | Ascl3    | 0.866 |
| Lbxcor1 | Zbtb16   | 0.866 |
| Rab7    | Ube2i    | 0.866 |
| Zfp369  | Ngfr     | 0.866 |
| Pura    | Ccnb1    | 0.866 |
| Rai14   | Rfx4     | 0.866 |
| Max     | Hes6     | 0.866 |
| Egr2    | Snap25   | 0.866 |
| Mixl1   | Hoxd3    | 0.866 |
| Nbr1    | Dlg1     | 0.866 |



|         |          |       |
|---------|----------|-------|
| Trib2   | Rbl1     | 0.866 |
| Akr1b3  | S100a4   | 0.866 |
| Tirap   | Vav1     | 0.866 |
| Pparg   | Myd88    | 0.866 |
| Pparg   | Tax1bp1  | 0.866 |
| Pparg   | Hras1    | 0.866 |
| Pparg   | Lass2    | 0.866 |
| Kdm4c   | Lhx2     | 0.866 |
| Fancd2  | Hdac6    | 0.866 |
| Fancd2  | Mycn     | 0.866 |
| Dynll1  | Plec     | 0.866 |
| Cdx4    | Dlx1     | 0.866 |
| Inpp1   | Ppp2r3a  | 0.866 |
| Suz12   | Eif2c2   | 0.866 |
| Suz12   | Ell      | 0.866 |
| Cask    | Dlg1     | 0.866 |
| Mef2a   | Prdm16   | 0.865 |
| Mecp2   | Myod1    | 0.865 |
| Tnf     | Tnfrsf1a | 0.865 |
| Tnfaip3 | Ube2n    | 0.865 |
| Gtf2a1l | Hnf4g    | 0.865 |
| Shc1    | Vav1     | 0.865 |
| Sorbs1  | Sla      | 0.865 |
| Sorbs1  | Ticam1   | 0.865 |
| Rarg    | Kat2a    | 0.865 |
| Usf1    | Kat2b    | 0.865 |
| Cited4  | Maml1    | 0.865 |
| Rnh1    | Krt14    | 0.865 |
| Sgca    | Cryab    | 0.865 |
| Actbl2  | Prss1    | 0.865 |
| Per1    | Arntl    | 0.865 |
| Id3     | Tlx1     | 0.865 |
| Irf8    | Mdm2     | 0.865 |
| Id1     | Sirt2    | 0.865 |
| Cd2ap   | Gtf2b    | 0.865 |
| Rac1    | Eif2c2   | 0.865 |
| Usp2    | Smn1     | 0.865 |
| Sod1    | Sykb     | 0.865 |
| Sod1    | Tbk1     | 0.865 |
| Lmnbl   | Zbtb16   | 0.865 |
| Lmnbl   | Sun1     | 0.865 |
| Sirt1   | Jun      | 0.865 |
| Hist2h4 | Taf15    | 0.865 |
| Hist2h4 | Brca1    | 0.865 |
| Atf4    | Jun      | 0.865 |
| Slc11a1 | Gria1    | 0.865 |

|          |          |       |
|----------|----------|-------|
| Slc11a1  | Casp8    | 0.865 |
| Grip1    | Nrip1    | 0.865 |
| Bcl6     | Zfp111   | 0.865 |
| Sox2     | Jun      | 0.865 |
| Mapt     | Hdac6    | 0.865 |
| Egr1     | Sox9     | 0.865 |
| Mixl1    | Gtf3c1   | 0.865 |
| Mixl1    | Runx1t1  | 0.865 |
| Tmf1     | Ntrk1    | 0.865 |
| Nbr1     | Ngfr     | 0.865 |
| Tbpl1    | Spata24  | 0.865 |
| Cenpv    | Mllt1    | 0.865 |
| Tlx1     | Meis1    | 0.865 |
| Hbb-b1   | Dnajb1   | 0.865 |
| Cyld     | Ikbkg    | 0.865 |
| Aldoa    | Cycs     | 0.865 |
| Pparg    | Mdm2     | 0.865 |
| Phc3     | Zbtb33   | 0.865 |
| Ubb      | Ccar1    | 0.865 |
| Ubb      | Hsp90aa1 | 0.865 |
| Fancd2   | Mdm4     | 0.865 |
| Syn2     | Actr1a   | 0.865 |
| Syn2     | Pfn1     | 0.865 |
| Gtf3c1   | Dlx2     | 0.865 |
| Hist3h2a | Gtf2b    | 0.865 |
| Hist3h2a | Sertad1  | 0.865 |
| Hist3h2a | Sfn      | 0.865 |
| Ifrd1    | Hdac5    | 0.865 |
| Ubqln2   | Psmc3    | 0.865 |
| Fas      | Uimc1    | 0.865 |
| Fas      | Ube3a    | 0.865 |
| Bach1    | Gata4    | 0.864 |
| Map2k6   | Map2k4   | 0.864 |
| Gtf2a1l  | Dlx1     | 0.864 |
| Psm4     | Naglu    | 0.864 |
| Psm4     | Krt77    | 0.864 |
| Shc1     | Dok3     | 0.864 |
| Gabra1   | Gabrb2   | 0.864 |
| Uhrf1    | Eme1     | 0.864 |
| Epc1     | Cbx7     | 0.864 |
| Cited4   | Zbtb9    | 0.864 |
| Rnh1     | Cand2    | 0.864 |
| Rnh1     | Trim28   | 0.864 |
| Rnh1     | Eef1a1   | 0.864 |
| Id3      | Krt73    | 0.864 |
| Irf8     | Gli2     | 0.864 |

|         |            |       |
|---------|------------|-------|
| Psm4    | Mitf       | 0.864 |
| Mafk    | Taf5       | 0.864 |
| Sod1    | Sh3gl2     | 0.864 |
| Irf1    | 1500035H01 | 0.864 |
| Sirt1   | Rela       | 0.864 |
| Rab3d   | Ldha       | 0.864 |
| Hist2h4 | Prpf31     | 0.864 |
| Pura    | Fbxo4      | 0.864 |
| Skp1a   | Skp2       | 0.864 |
| Slc11a1 | Cbx7       | 0.864 |
| Ccnd3   | Cdk4       | 0.864 |
| Adcy3   | Flot1      | 0.864 |
| Mapt    | Smn1       | 0.864 |
| Egr2    | Cdkn1a     | 0.864 |
| Egr2    | Ulk1       | 0.864 |
| Mixl1   | Foxh1      | 0.864 |
| Tmf1    | Fam175b    | 0.864 |
| Nbr1    | Runx2      | 0.864 |
| Nbr1    | Ddx41      | 0.864 |
| Prkca   | Prkcc      | 0.864 |
| Aldoa   | Krt42      | 0.864 |
| Neurog2 | Olig2      | 0.864 |
| Ppard   | Ppara      | 0.864 |
| Pparg   | Ccar1      | 0.864 |
| Pparg   | Rela       | 0.864 |
| Pparg   | Dlg1       | 0.864 |
| Kdm4c   | Pdlim4     | 0.864 |
| Syn2    | Capza1     | 0.864 |
| Nr1i3   | Ppp2ca     | 0.864 |
| Ppp1cc  | Cdkn2a     | 0.864 |
| Ubqln2  | Hspa9      | 0.864 |
| Csnk1e  | Apc        | 0.863 |
| Mapkbp1 | Dusp2      | 0.863 |
| Mecp2   | Trps1      | 0.863 |
| Mecp2   | Kat2b      | 0.863 |
| Gtf2a1l | Nr3c1      | 0.863 |
| Shc1    | Cebpb      | 0.863 |
| Sorbs1  | Gata4      | 0.863 |
| Col5a1  | Smad2      | 0.863 |
| Cited4  | Hnf1b      | 0.863 |
| Rnh1    | Kpnb1      | 0.863 |
| Id3     | Cops8      | 0.863 |
| Id1     | Cops4      | 0.863 |
| Id1     | Jun        | 0.863 |
| Gtf2h1  | Nkx2-2     | 0.863 |
| Gtf2h1  | Sirt2      | 0.863 |

|          |            |       |
|----------|------------|-------|
| Fadd     | Ripk1      | 0.863 |
| Traf2    | Ube2n      | 0.863 |
| Pura     | Fzr1       | 0.863 |
| Nr1i2    | Ppard      | 0.863 |
| Nr1i2    | Mef2c      | 0.863 |
| Slc11a1  | Ulk1       | 0.863 |
| Pias3    | Fem1a      | 0.863 |
| Pias3    | Naca       | 0.863 |
| Esr1     | Arid1b     | 0.863 |
| Tlr4     | Irak1      | 0.863 |
| Efr3b    | Pi4ka      | 0.863 |
| Mtf1     | Zfp236     | 0.863 |
| Egr2     | Vim        | 0.863 |
| Mixl1    | Dlx1       | 0.863 |
| Tmf1     | Reg1       | 0.863 |
| Cyld     | Junb       | 0.863 |
| Aldoa    | Hnrnp2     | 0.863 |
| Pparg    | Map3k2     | 0.863 |
| Ncoa6    | Tfdp1      | 0.863 |
| H1f0     | Gtf3c1     | 0.863 |
| Chordc1  | Hsp90aa1   | 0.863 |
| H1       | Ccna1      | 0.863 |
| Hba-a1   | Atp5d      | 0.863 |
| Srf      | Fos        | 0.863 |
| Suz12    | Dnajb1     | 0.863 |
| Hist3h2a | Zfp592     | 0.863 |
| Zfp277   | Zscan2     | 0.863 |
| Tbrg1    | Uqcrc1     | 0.863 |
| Map2k6   | Birc2      | 0.862 |
| Mecp2    | Smarca1    | 0.862 |
| Mecp2    | Hist4h4    | 0.862 |
| Als2     | Gria2      | 0.862 |
| Krt10    | 2210010C04 | 0.862 |
| Cited4   | Stk38      | 0.862 |
| Cited4   | Nr1h4      | 0.862 |
| Rnh1     | Dynll1     | 0.862 |
| Cd2ap    | Flt1       | 0.862 |
| Rac1     | Ppp5c      | 0.862 |
| Phb2     | Sfrs3      | 0.862 |
| Eif3b    | Cfl1       | 0.862 |
| Sod1     | Polk       | 0.862 |
| Sod1     | Atp5a1     | 0.862 |
| Gtf2h1   | Cnot8      | 0.862 |
| Gtf2h1   | H3f3a      | 0.862 |
| Gata4    | Smad2      | 0.862 |
| Pura     | Git1       | 0.862 |

|         |         |       |
|---------|---------|-------|
| Ring1   | Phc2    | 0.862 |
| Tle1    | Setx    | 0.862 |
| Tcf12   | Trim27  | 0.862 |
| Pias3   | Pax6    | 0.862 |
| Ccnd1   | Fbxo4   | 0.862 |
| Ctnnd1  | Cdh1    | 0.862 |
| Rnf19a  | Pias1   | 0.862 |
| Egr2    | Tmf1    | 0.862 |
| Egr2    | Nbr1    | 0.862 |
| Egr2    | Cblb    | 0.862 |
| Egr2    | Jun     | 0.862 |
| Cenpv   | Dnajb1  | 0.862 |
| Aldoa   | Eef1a1  | 0.862 |
| Aldoa   | Tubb5   | 0.862 |
| Tirap   | Tceb1   | 0.862 |
| Pparg   | Itpr3   | 0.862 |
| Pparg   | Casp8   | 0.862 |
| Pparg   | Sox8    | 0.862 |
| Pparg   | Nos2    | 0.862 |
| Pparg   | Gli2    | 0.862 |
| Fancd2  | Bcr     | 0.862 |
| Dynll1  | Eef1a1  | 0.862 |
| Cops6   | Cops4   | 0.862 |
| Hba-a1  | Hspa9   | 0.862 |
| Casp8   | Sh3gl2  | 0.862 |
| Nrip1   | Vdr     | 0.862 |
| Notch1  | Smarcd3 | 0.862 |
| Bag1    | Mafb    | 0.861 |
| Mef2a   | Gata4   | 0.861 |
| Tnf     | Ripk1   | 0.861 |
| Gtf2a1l | Kdm4b   | 0.861 |
| Sorbs1  | Sh3kbp1 | 0.861 |
| Sorbs1  | Zap70   | 0.861 |
| Sorbs1  | Inpp1   | 0.861 |
| Gabra1  | Ppp3ca  | 0.861 |
| Epc1    | Ncoa1   | 0.861 |
| Epc1    | Kat2a   | 0.861 |
| Epc1    | Myod1   | 0.861 |
| Bcl11b  | Suz12   | 0.861 |
| Irf8    | Tax1bp1 | 0.861 |
| Usp2    | Ntrk2   | 0.861 |
| Six3    | Eya1    | 0.861 |
| Nkx2-5  | Hand2   | 0.861 |
| Nod1    | Chordc1 | 0.861 |
| Traf6   | Myd88   | 0.861 |
| Rab5b   | Dvl3    | 0.861 |

|          |          |       |
|----------|----------|-------|
| Pura     | Cdk4     | 0.861 |
| Pura     | Cebpa    | 0.861 |
| Ascl1    | Tcf12    | 0.861 |
| Pias3    | Nfkbia   | 0.861 |
| Egr1     | Bahd1    | 0.861 |
| Egr2     | Smad2    | 0.861 |
| Egr2     | Mdm4     | 0.861 |
| Atg5     | Rab33b   | 0.861 |
| Nbr1     | Ntrk2    | 0.861 |
| Nbr1     | Reg1     | 0.861 |
| Prkca    | Mcl1     | 0.861 |
| Akr1b3   | Eprs     | 0.861 |
| Med1     | Smarcd3  | 0.861 |
| Pparg    | Ctnn     | 0.861 |
| Ubb      | Hnrnpf   | 0.861 |
| Ubb      | Sfn      | 0.861 |
| Ubb      | Plec     | 0.861 |
| H1f0     | Pcna     | 0.861 |
| H1f0     | Vav1     | 0.861 |
| Fancd2   | Uimc1    | 0.861 |
| Dynll1   | Krt76    | 0.861 |
| H1       | Cdk1     | 0.861 |
| Map3k5   | Rassf1   | 0.861 |
| Itpr1    | Ufd1l    | 0.861 |
| Gtf3c1   | Atxn2    | 0.861 |
| Suz12    | Atxn2    | 0.861 |
| Hist3h2a | Psme3    | 0.861 |
| Hdac3    | Ncor1    | 0.861 |
| Casp3    | Slc1a2   | 0.861 |
| Fbxw8    | Cul7     | 0.86  |
| Ksr1     | Map2k1   | 0.86  |
| Bag1     | Kcnb1    | 0.86  |
| Bach1    | Klf10    | 0.86  |
| Map2k4   | Sash1    | 0.86  |
| Map2k4   | Traf3ip2 | 0.86  |
| Mecp2    | Nkd2     | 0.86  |
| Gtf2a1l  | Vdr      | 0.86  |
| Psma4    | Actn4    | 0.86  |
| Shc1     | Itch     | 0.86  |
| Shc1     | Csf1r    | 0.86  |
| Usf1     | Myod1    | 0.86  |
| Rad51    | H2afx    | 0.86  |
| Irf9     | Pou2f1   | 0.86  |
| Id3      | Dsg1a    | 0.86  |
| Id1      | Hif1a    | 0.86  |
| Cd2ap    | Erbp2    | 0.86  |

|          |          |       |
|----------|----------|-------|
| Cd2ap    | Inpp5d   | 0.86  |
| Raf1     | Akap9    | 0.86  |
| Rac1     | Actn2    | 0.86  |
| Sod1     | Hspa5    | 0.86  |
| Traf6    | Irf5     | 0.86  |
| Pura     | Ccnd2    | 0.86  |
| Pura     | Fus      | 0.86  |
| Nr1i2    | Polr3f   | 0.86  |
| Ywhag    | Lrrk2    | 0.86  |
| Egfr     | Ptpn11   | 0.86  |
| Esr1     | Pax3     | 0.86  |
| Mtf2     | Rpl28    | 0.86  |
| Ncoa2    | Mef2c    | 0.86  |
| Egr2     | Ntrk2    | 0.86  |
| Egr2     | Hdac5    | 0.86  |
| Tmf1     | Fancd2   | 0.86  |
| Magi2    | Pex6     | 0.86  |
| Nbr1     | Sykb     | 0.86  |
| Ncam1    | Dnm1     | 0.86  |
| Stam2    | Hgs      | 0.86  |
| Pparg    | Spry2    | 0.86  |
| Pparg    | Ppp2cb   | 0.86  |
| Pparg    | Notch1   | 0.86  |
| Ppargc1a | Ncor1    | 0.86  |
| Ubb      | Hspa2    | 0.86  |
| Fancd2   | Atxn3    | 0.86  |
| Eef1a1   | Hsp90aa1 | 0.86  |
| Blnk     | Vrk3     | 0.86  |
| Brca1    | Nbn      | 0.86  |
| Cask     | Sh3gl2   | 0.86  |
| Fas      | Mdm2     | 0.86  |
| Foxh1    | Vdr      | 0.86  |
| Sf1      | Pitx1    | 0.859 |
| Bad      | Sox9     | 0.859 |
| Bach1    | Smad5    | 0.859 |
| Mef2a    | Itch     | 0.859 |
| Mef2a    | Ddx5     | 0.859 |
| Map2k6   | Stk39    | 0.859 |
| Map2k6   | Tnip3    | 0.859 |
| Map2k6   | Traf3ip2 | 0.859 |
| Spna2    | Ywhab    | 0.859 |
| Gtf2a1l  | Pknox2   | 0.859 |
| Psm4     | Actn1    | 0.859 |
| Sorbs3   | Rfxank   | 0.859 |
| Epc1     | Tcf12    | 0.859 |
| Rad51    | Psme3    | 0.859 |

|          |           |       |
|----------|-----------|-------|
| Actbl2   | Hnrnpa2b1 | 0.859 |
| Cry1     | Arntl     | 0.859 |
| Id2      | Hmga2     | 0.859 |
| Id2      | Myod1     | 0.859 |
| Id2      | Rnf14     | 0.859 |
| Id3      | Actc1     | 0.859 |
| Id1      | Gps1      | 0.859 |
| Col3a1   | Smad4     | 0.859 |
| Psmb5    | Ngfr      | 0.859 |
| Psmb1    | Atp2a2    | 0.859 |
| Usp2     | Was       | 0.859 |
| Usp2     | Pten      | 0.859 |
| Usp2     | Eif2c2    | 0.859 |
| Sod1     | Eif2a     | 0.859 |
| Lmo2     | Lhx5      | 0.859 |
| Lmo2     | Lhx4      | 0.859 |
| Gtf2h1   | Kat2b     | 0.859 |
| Gtf2h1   | Hif1a     | 0.859 |
| Atp6v1a  | Actn4     | 0.859 |
| Gata4    | Smarcd3   | 0.859 |
| Ssbp3    | Med16     | 0.859 |
| Rab3d    | Tollip    | 0.859 |
| Pura     | Kat2a     | 0.859 |
| Hnf1a    | Zdhhc13   | 0.859 |
| Pias3    | Hsf1      | 0.859 |
| Mtf2     | Trim35    | 0.859 |
| Ncoa3    | Sap18     | 0.859 |
| Lbr      | Hist4h4   | 0.859 |
| Tmf1     | Skil      | 0.859 |
| Nbr1     | Ski       | 0.859 |
| Hbb-b1   | Fbln2     | 0.859 |
| Ppargc1a | Fos       | 0.859 |
| Ncoa6    | E2f6      | 0.859 |
| Ubb      | Mysm1     | 0.859 |
| Dynll1   | Gcn1l1    | 0.859 |
| Syn2     | Aph1a     | 0.859 |
| Fyn      | Csf1r     | 0.859 |
| Eef1a1   | Capzb     | 0.859 |
| Rbpj     | Smarcd3   | 0.859 |
| Gria2    | Gria3     | 0.859 |
| Sumo1    | Mdm2      | 0.859 |
| Bag1     | Dnajb1    | 0.858 |
| Map2k6   | Mapkapk2  | 0.858 |
| Map2k4   | Tnip3     | 0.858 |
| Mecp2    | Msx2      | 0.858 |
| Mecp2    | Cebpa     | 0.858 |



|         |         |       |
|---------|---------|-------|
| Bcl2l11 | Bcl2    | 0.858 |
| Psm4    | Eprs    | 0.858 |
| Als2    | Accn1   | 0.858 |
| Rarg    | Kat2b   | 0.858 |
| Cited4  | Tox3    | 0.858 |
| Cited4  | Rfxank  | 0.858 |
| Sgca    | Ahnak   | 0.858 |
| Cry1    | Clock   | 0.858 |
| Per2    | Arntl   | 0.858 |
| Per2    | Clock   | 0.858 |
| Id3     | Krt14   | 0.858 |
| Id1     | Sox8    | 0.858 |
| Cd2ap   | Atr     | 0.858 |
| Homer2  | Grm5    | 0.858 |
| Psm1    | Dnaja3  | 0.858 |
| Usp2    | Polk    | 0.858 |
| Sod1    | Fancd2  | 0.858 |
| Gtf2h1  | E4f1    | 0.858 |
| Rab5b   | Srebf2  | 0.858 |
| Zfp369  | Sertad1 | 0.858 |
| Hist2h4 | Stub1   | 0.858 |
| Hist2h4 | Zzz3    | 0.858 |
| Tle1    | Taz     | 0.858 |
| Atf4    | Egln3   | 0.858 |
| Nr1i2   | Cebpd   | 0.858 |
| Adrbk1  | Gng2    | 0.858 |
| Mapt    | Lbr     | 0.858 |
| Zfp236  | Hoxa2   | 0.858 |
| Ctf2    | Il6st   | 0.858 |
| Mixl1   | Ifnar2  | 0.858 |
| Tmf1    | Pou6f1  | 0.858 |
| Aldoa   | Vdac1   | 0.858 |
| Aldoa   | Prkcsh  | 0.858 |
| Akr1b3  | Prdm16  | 0.858 |
| Tirap   | Il1r1   | 0.858 |
| Cbx2    | Phc3    | 0.858 |
| Pparg   | Lyn     | 0.858 |
| Pparg   | Foxo3   | 0.858 |
| Ncoa6   | Bcor    | 0.858 |
| Kdm4c   | Arid1b  | 0.858 |
| Ski     | Gli3    | 0.858 |
| Dbnl    | Plec    | 0.858 |
| Dynll1  | Eef2    | 0.858 |
| Dynll1  | Atp5a1  | 0.858 |
| Gria1   | Lrp1    | 0.858 |
| Suz12   | Jarid2  | 0.858 |

|           |          |       |
|-----------|----------|-------|
| Nup62     | Nxf1     | 0.858 |
| Ifrd1     | Ppp2ca   | 0.858 |
| Ppp1cc    | Cdk4     | 0.858 |
| Ubqln2    | Fbln2    | 0.858 |
| Sf3b1     | Phc2     | 0.858 |
| Map2k4    | Map3k1   | 0.857 |
| Mecp2     | Rela     | 0.857 |
| Tnfaip3   | Ikbkg    | 0.857 |
| Sorbs1    | Fyn      | 0.857 |
| Rin1      | Ywhab    | 0.857 |
| Rad51     | Atr      | 0.857 |
| Rad51     | Iqgap1   | 0.857 |
| Bcl11b    | Gnao1    | 0.857 |
| Bcl11b    | Atxn2    | 0.857 |
| Actbl2    | Mapkapk2 | 0.857 |
| Cry2      | Fbxl3    | 0.857 |
| Id2       | Kat2b    | 0.857 |
| Cd2ap     | Rps6ka3  | 0.857 |
| Usp2      | Tnk2     | 0.857 |
| Sod1      | Ngfr     | 0.857 |
| Lmnb1     | Syncrip  | 0.857 |
| Fadd      | Lrdd     | 0.857 |
| Sirt1     | Nr0b2    | 0.857 |
| Pura      | Nr1h4    | 0.857 |
| Eif4enif1 | Smad4    | 0.857 |
| Hnf1a     | Sp2      | 0.857 |
| Slc11a1   | Bmi1     | 0.857 |
| Ccnd2     | Cdk4     | 0.857 |
| Mtf1      | Rorb     | 0.857 |
| Egr2      | Ddx41    | 0.857 |
| Ncam1     | Mbp      | 0.857 |
| Siah2     | Spry4    | 0.857 |
| Cenpv     | Eno3     | 0.857 |
| Vim       | Nphp1    | 0.857 |
| Hbb-b1    | Slc25a3  | 0.857 |
| Aldoa     | Foxp1    | 0.857 |
| Aldoa     | Psmc5    | 0.857 |
| Akr1b3    | Hnrnpa1  | 0.857 |
| Stat5a    | Stat5b   | 0.857 |
| Zfp473    | Nkd2     | 0.857 |
| Pparg     | Tab3     | 0.857 |
| Pparg     | Mpl      | 0.857 |
| Ubb       | Rps3     | 0.857 |
| Thoc4     | Map2k7   | 0.857 |
| Dynll1    | Ruvbl2   | 0.857 |
| Syn2      | Gsn      | 0.857 |

|          |          |       |
|----------|----------|-------|
| Hba-a1   | Fbln2    | 0.857 |
| Adcy8    | Ppp2ca   | 0.857 |
| Hist3h2a | Spata24  | 0.857 |
| Casp8    | Vdac1    | 0.857 |
| Nrip1    | Cebpa    | 0.857 |
| Nphp1    | Tuba1b   | 0.857 |
| Syvn1    | Herpud1  | 0.856 |
| Mef2a    | Zfp128   | 0.856 |
| Psma4    | Myo1c    | 0.856 |
| Shc1     | Sorbs1   | 0.856 |
| Shc1     | Sh3kbp1  | 0.856 |
| Sorbs1   | Ppp1ca   | 0.856 |
| Gabbr1   | Kif1b    | 0.856 |
| Epc1     | Cbx2     | 0.856 |
| Usf1     | Hif1a    | 0.856 |
| Rnh1     | Krt16    | 0.856 |
| Rnh1     | Try10    | 0.856 |
| Sgca     | Pgm5     | 0.856 |
| Actbl2   | Mllt1    | 0.856 |
| Irf8     | Reg1     | 0.856 |
| Psmb1    | Cct6a    | 0.856 |
| Psmb1    | Actn4    | 0.856 |
| Irak3    | Casp6    | 0.856 |
| Usp2     | Flt1     | 0.856 |
| Sod1     | Slc11a1  | 0.856 |
| Sod1     | Cflar    | 0.856 |
| Lmnb1    | Gm5414   | 0.856 |
| Lmo2     | Lmx1b    | 0.856 |
| Lmo2     | Lhx1     | 0.856 |
| Gtf2h1   | Snai1    | 0.856 |
| Cdk5     | Hist1h1a | 0.856 |
| Nkx2-5   | Tbx5     | 0.856 |
| Rab7     | Myh9     | 0.856 |
| Rab3d    | Pkm2     | 0.856 |
| Hist2h4  | Pcna     | 0.856 |
| Ahi1     | Actb     | 0.856 |
| Rai14    | Zfp277   | 0.856 |
| Rai14    | Lhx2     | 0.856 |
| Tcf12    | Tle6     | 0.856 |
| Slc11a1  | Nbr1     | 0.856 |
| Mapt     | Camk1    | 0.856 |
| Zfp236   | Mycn     | 0.856 |
| Egr1     | Creb1    | 0.856 |
| Egr2     | Hhex     | 0.856 |
| Eya3     | Tle6     | 0.856 |
| Cyld     | Ntrk2    | 0.856 |

|         |          |       |
|---------|----------|-------|
| Aldoa   | Ubqln2   | 0.856 |
| Aldoa   | Telo2    | 0.856 |
| Aldoa   | Tuba1b   | 0.856 |
| Pparg   | Prkdc    | 0.856 |
| Ubb     | Naca     | 0.856 |
| Ubb     | Mapk3    | 0.856 |
| Dok3    | Inpp5d   | 0.856 |
| Isl2    | Lhx4     | 0.856 |
| Fancd2  | Arntl    | 0.856 |
| Fancd2  | Rhoa     | 0.856 |
| Fancd2  | Gli2     | 0.856 |
| Grin1   | Ctnnb1   | 0.856 |
| Aes     | Msx1     | 0.856 |
| Rassf1  | Daxx     | 0.856 |
| Blnk    | Mdk      | 0.856 |
| Rps13   | Cfl1     | 0.856 |
| Lef1    | Pin1     | 0.856 |
| Dlx1    | Dlx2     | 0.856 |
| Jund    | Fos      | 0.856 |
| Bag1    | Cdk2     | 0.855 |
| Bag1    | Sox8     | 0.855 |
| Mecp2   | Asb6     | 0.855 |
| Tnfaip3 | Med16    | 0.855 |
| Gtf2a1l | Hnf1a    | 0.855 |
| Rad51   | Hoxc12   | 0.855 |
| Cited4  | Zfp236   | 0.855 |
| Vps16   | Stx8     | 0.855 |
| Rnh1    | Anapc2   | 0.855 |
| Rnh1    | Vim      | 0.855 |
| Irf8    | Ctcf     | 0.855 |
| Psmb5   | Ntrk1    | 0.855 |
| Usp2    | Ski      | 0.855 |
| Lmnb1   | Baz1b    | 0.855 |
| Traf6   | Fbxo32   | 0.855 |
| Nr1i2   | Prdx5    | 0.855 |
| Slc11a1 | Cbx2     | 0.855 |
| Utrn    | Snta1    | 0.855 |
| Egr2    | Hsp90aa1 | 0.855 |
| Nbr1    | Sgta     | 0.855 |
| Nbr1    | Atg16l1  | 0.855 |
| Prkcd   | Atg16l1  | 0.855 |
| Med1    | Smad3    | 0.855 |
| Pparg   | Bcr      | 0.855 |
| Ncoa6   | Ctbp2    | 0.855 |
| Phc3    | Sf3b1    | 0.855 |
| Ubb     | Trim30   | 0.855 |

|        |          |       |
|--------|----------|-------|
| Ubb    | Ldhb     | 0.855 |
| Taf1a  | Taf1b    | 0.855 |
| Fancd2 | Casp3    | 0.855 |
| Brca1  | Jun      | 0.855 |
| Zfp277 | Taf1b    | 0.855 |
| Wwp1   | Ticam1   | 0.855 |
| Ltbr   | Casp9    | 0.855 |
| Foxh1  | Tbx5     | 0.855 |
| Jun    | Fos      | 0.855 |
| Sf1    | Egr1     | 0.854 |
| Mef2a  | Mecom    | 0.854 |
| Mecp2  | Abtb1    | 0.854 |
| Mecp2  | Zfp236   | 0.854 |
| Mecp2  | Zfp111   | 0.854 |
| Pasma4 | Ndufa4   | 0.854 |
| Pasma4 | Dnaja3   | 0.854 |
| Pasma4 | Cct6a    | 0.854 |
| Sorbs1 | Dlg1     | 0.854 |
| Epha2  | Krt6a    | 0.854 |
| Rarg   | Raf1     | 0.854 |
| Rarg   | Sfpi1    | 0.854 |
| Rad51  | Dnajb6   | 0.854 |
| Rnh1   | Myh9     | 0.854 |
| Cry1   | Timeless | 0.854 |
| Id3    | Flnc     | 0.854 |
| Id3    | Gps1     | 0.854 |
| Id3    | Sfpi1    | 0.854 |
| Id1    | Ncoa1    | 0.854 |
| Ss18   | Ezh2     | 0.854 |
| Eif3b  | Rbm3     | 0.854 |
| Eif3b  | Fbln2    | 0.854 |
| Sod1   | Igf1r    | 0.854 |
| Sod1   | Irf5     | 0.854 |
| Lmnb1  | Lbxcor1  | 0.854 |
| Lmo2   | Lmx1a    | 0.854 |
| Ssbp3  | Lass2    | 0.854 |
| Wbp11  | Gli2     | 0.854 |
| Rab5b  | Tubb4    | 0.854 |
| Rab3d  | Dlat     | 0.854 |
| Rab3d  | Uqcrc1   | 0.854 |
| Pura   | Nefh     | 0.854 |
| Tcf12  | Hoxc4    | 0.854 |
| Ywhah  | Lrrk2    | 0.854 |
| Psen2  | Pde10a   | 0.854 |
| Mtf1   | Mycn     | 0.854 |
| Irak4  | Irak1    | 0.854 |

|          |           |       |
|----------|-----------|-------|
| Egr2     | Nfatc1    | 0.854 |
| Nbr1     | Fancd2    | 0.854 |
| Nbr1     | Ctcf      | 0.854 |
| Cenpv    | Tollip    | 0.854 |
| Hbb-b1   | Telo2     | 0.854 |
| Tirap    | Prpf31    | 0.854 |
| Ncoa6    | Grin1     | 0.854 |
| Ubb      | Tubb6     | 0.854 |
| H1f0     | Bclaf1    | 0.854 |
| Smarce1  | Ppp1cc    | 0.854 |
| Map3k5   | Srebf2    | 0.854 |
| Gps1     | Hoxd12    | 0.854 |
| Hist3h2a | Bmi1      | 0.854 |
| Tbx21    | Dlx1      | 0.854 |
| Fas      | Sumo1     | 0.854 |
| Cdkn1a   | Mdm4      | 0.854 |
| Rara     | Ywhaz     | 0.853 |
| Syvn1    | Hdac6     | 0.853 |
| Sorbs3   | LOC674895 | 0.853 |
| Cited4   | Hdac10    | 0.853 |
| Axin2    | Gsk3b     | 0.853 |
| Id3      | Krt17     | 0.853 |
| Id3      | Ep300     | 0.853 |
| Id3      | Ankhd1    | 0.853 |
| Cd2ap    | Suz12     | 0.853 |
| Psmb1    | Cand2     | 0.853 |
| Rac1     | Ppp3ca    | 0.853 |
| Rab7     | Cbx5      | 0.853 |
| Pura     | Ncl       | 0.853 |
| Pura     | Calm1     | 0.853 |
| Rai14    | Phf2      | 0.853 |
| Zfp354a  | Cbx5      | 0.853 |
| Naglu    | Try10     | 0.853 |
| Pias3    | Brpf1     | 0.853 |
| Cdx2     | Dlx5      | 0.853 |
| Efs      | Gab1      | 0.853 |
| Sqstm1   | Ulk1      | 0.853 |
| Pitx1    | Egr1      | 0.853 |
| Egr2     | Mdm2      | 0.853 |
| Tle4     | Pax3      | 0.853 |
| Nbr1     | Phf20     | 0.853 |
| Siah2    | Spry1     | 0.853 |
| Bhlhe41  | Rfx4      | 0.853 |
| Pparg    | Jun       | 0.853 |
| Trip4    | Lass5     | 0.853 |
| Zfp110   | Actn4     | 0.853 |

|         |          |       |
|---------|----------|-------|
| Phc3    | Usp7     | 0.853 |
| Fancd2  | Vdac1    | 0.853 |
| Snapc4  | Zfp111   | 0.853 |
| Trim30  | Gria1    | 0.853 |
| Hba-a1  | Cfl1     | 0.853 |
| Pten    | Ndfip1   | 0.853 |
| Ikbkb   | Reg1     | 0.853 |
| Srf     | H3f3a    | 0.853 |
| Blnk    | Arid3a   | 0.853 |
| Tbrg1   | Rpl28    | 0.853 |
| Casp8   | Tax1bp1  | 0.853 |
| Bat1a   | Gli2     | 0.853 |
| Bat1a   | Csf1r    | 0.853 |
| Bag1    | Brca1    | 0.852 |
| Mef2a   | Ankra2   | 0.852 |
| Mecp2   | Hnf1b    | 0.852 |
| Mecp2   | Hnf4a    | 0.852 |
| Mecp2   | Hdac9    | 0.852 |
| Psma4   | Krt14    | 0.852 |
| Sorbs3  | Cul5     | 0.852 |
| Rarg    | Myocd    | 0.852 |
| Krt10   | Lox      | 0.852 |
| Gpbp1   | Phf17    | 0.852 |
| Itch    | Ripk1    | 0.852 |
| Rnh1    | Anxa2    | 0.852 |
| Rnh1    | Krt77    | 0.852 |
| Rnh1    | Hsp90aa1 | 0.852 |
| Id3     | Otx2     | 0.852 |
| Irf8    | Foxo3    | 0.852 |
| Cd2ap   | Pxn      | 0.852 |
| Zfand2a | Psm14    | 0.852 |
| Usp2    | Gbp2     | 0.852 |
| Usp2    | Poli     | 0.852 |
| Usp2    | Flt3     | 0.852 |
| Sod1    | Ripk1    | 0.852 |
| Lmnb1   | Ncl      | 0.852 |
| Lmnb1   | Ddx5     | 0.852 |
| Park2   | Sh3gl2   | 0.852 |
| Sirt1   | Hnf4a    | 0.852 |
| Sirt1   | Nr1h4    | 0.852 |
| Traf6   | Mdm2     | 0.852 |
| Hist2h4 | Eif4a2   | 0.852 |
| Hist2h4 | Med16    | 0.852 |
| Pura    | Mark3    | 0.852 |
| Pura    | Ddx5     | 0.852 |
| Senp6   | Sumo3    | 0.852 |

|         |         |       |
|---------|---------|-------|
| Tle1    | Myod1   | 0.852 |
| Hnf1a   | Polr1a  | 0.852 |
| Naglu   | Spata24 | 0.852 |
| Naglu   | Eprs    | 0.852 |
| Nphp3   | Krt79   | 0.852 |
| Egr1    | Mcl1    | 0.852 |
| Egr2    | Calr    | 0.852 |
| Egr2    | Ccar1   | 0.852 |
| Egr2    | lkbkg   | 0.852 |
| Pias1   | Setdb1  | 0.852 |
| Gsc     | lfrd1   | 0.852 |
| Magi2   | Foxh1   | 0.852 |
| Nbr1    | Nos2    | 0.852 |
| Ncam1   | Syn1    | 0.852 |
| Akr1b3  | Pdia6   | 0.852 |
| Camk2a  | Dlg1    | 0.852 |
| Krt73   | Nphp1   | 0.852 |
| Ppard   | Pparg   | 0.852 |
| Pparg   | Trp53   | 0.852 |
| Pparg   | Atxn3   | 0.852 |
| Fancd2  | Map3k2  | 0.852 |
| Fancd2  | Flt3    | 0.852 |
| Suz12   | Syn1    | 0.852 |
| Pcna    | Cdk4    | 0.852 |
| Arhgef7 | Lrrk2   | 0.852 |
| Ubqln2  | Rpl7    | 0.852 |
| Gab1    | Fasn    | 0.852 |
| Bag1    | Cyld    | 0.851 |
| Psm4    | Tubb6   | 0.851 |
| Shc1    | ErbB2   | 0.851 |
| Sorbs1  | Cav1    | 0.851 |
| Rsad2   | Irak1   | 0.851 |
| Rad51   | Gtf2b   | 0.851 |
| Rad51   | Hoxa2   | 0.851 |
| Rnh1    | Atp5a1  | 0.851 |
| Bcl11b  | Dnajb6  | 0.851 |
| Sgca    | Ldb3    | 0.851 |
| Cd2ap   | Map2k1  | 0.851 |
| Psm4    | Cflar   | 0.851 |
| Psm1    | Naglu   | 0.851 |
| Psm1    | Eprs    | 0.851 |
| Usp2    | Mycn    | 0.851 |
| Sod1    | Junb    | 0.851 |
| Slc2a4  | Mapk8   | 0.851 |
| Traf6   | Hspa1b  | 0.851 |
| Rab7    | Strap   | 0.851 |



|          |         |       |
|----------|---------|-------|
| Rab3d    | Ckm     | 0.851 |
| Naglu    | Prdx1   | 0.851 |
| Mtf2     | Trip4   | 0.851 |
| Birc3    | Ticam1  | 0.851 |
| Eya3     | Pknox2  | 0.851 |
| Nbr1     | Zfp110  | 0.851 |
| Nbr1     | Mycn    | 0.851 |
| Nbr1     | Gli3    | 0.851 |
| Ncam1    | Arhgef7 | 0.851 |
| Tlx1     | Pbx1    | 0.851 |
| Rb1      | Cdk2    | 0.851 |
| Aldoa    | Ldb3    | 0.851 |
| Akr1b3   | Purb    | 0.851 |
| Tirap    | Jak1    | 0.851 |
| Atg12    | Rab33b  | 0.851 |
| Sf3b2    | Smad2   | 0.851 |
| Notch2   | Notch4  | 0.851 |
| Ppard    | Thrb    | 0.851 |
| Kdm4c    | Sirt2   | 0.851 |
| Ubb      | Myl12b  | 0.851 |
| Ubb      | Hsp90b1 | 0.851 |
| Ewsr1    | Nkd2    | 0.851 |
| Scmh1    | Gmn     | 0.851 |
| Blk      | Pea15a  | 0.851 |
| Hist3h2a | Tsc22d3 | 0.851 |
| Ubqln2   | Prdm16  | 0.851 |
| Sf3b1    | Bmi1    | 0.851 |
| Mapkbp1  | Slc2a4  | 0.85  |
| Psm4     | Prkacb  | 0.85  |
| Sorbs1   | Dok1    | 0.85  |
| Epc1     | Ascl1   | 0.85  |
| Krt10    | Glud1   | 0.85  |
| Rnh1     | Pcp2    | 0.85  |
| Rnh1     | Actn1   | 0.85  |
| Rnh1     | Hspa2   | 0.85  |
| Irf8     | Cebpb   | 0.85  |
| Id1      | Pbx2    | 0.85  |
| Psm4     | Ntrk1   | 0.85  |
| Psm1     | Krt78   | 0.85  |
| Kat5     | Dnmt1   | 0.85  |
| Usp2     | Nr1h3   | 0.85  |
| Usp2     | Egr2    | 0.85  |
| Usp2     | Skil    | 0.85  |
| Sod1     | Smn1    | 0.85  |
| Sod1     | Anxa1   | 0.85  |
| Lmn1     | Hnrnpk  | 0.85  |

|          |          |       |
|----------|----------|-------|
| Gtf2h1   | Pbx2     | 0.85  |
| Trps1    | Dynll1   | 0.85  |
| Traip    | Irf3     | 0.85  |
| Pura     | Ccnd1    | 0.85  |
| Pura     | Kcnd2    | 0.85  |
| Pura     | E2f3     | 0.85  |
| Ring1    | Cbx7     | 0.85  |
| Ascl1    | Trim27   | 0.85  |
| App      | Bace1    | 0.85  |
| Pknox1   | Smad2    | 0.85  |
| Naglu    | Myl12b   | 0.85  |
| Slc11a1  | Ar       | 0.85  |
| Ndel1    | Pafah1b1 | 0.85  |
| Nbr1     | Was      | 0.85  |
| Ube2l3   | Eya1     | 0.85  |
| Aldoa    | Hsp90aa1 | 0.85  |
| Akr1b3   | Gm5414   | 0.85  |
| Akr1b3   | Alb      | 0.85  |
| Sf3b2    | Foxp1    | 0.85  |
| H1f0     | Hspa2    | 0.85  |
| Map3k5   | Ltbr     | 0.85  |
| Grin1    | Ppp1cc   | 0.85  |
| Sufu     | Lgals3   | 0.85  |
| Hist3h2a | Cbx7     | 0.85  |
| Hist3h2a | Csk      | 0.85  |
| Casp8    | Gria3    | 0.85  |
| Casp8    | Uimc1    | 0.85  |
| Zfp263   | Cxxc1    | 0.849 |
| Bag1     | Nhlrc1   | 0.849 |
| Bag1     | Aldoa    | 0.849 |
| Bach1    | Mecom    | 0.849 |
| Map2k4   | Tab3     | 0.849 |
| Gtf2a1l  | Irf9     | 0.849 |
| Psm4     | Krt17    | 0.849 |
| Shc1     | Egfr     | 0.849 |
| Epha2    | Try5     | 0.849 |
| Krt10    | Prss1    | 0.849 |
| Cited4   | Setx     | 0.849 |
| Rnh1     | Actc1    | 0.849 |
| Rnh1     | Actb     | 0.849 |
| Cryab    | Ccnd1    | 0.849 |
| Id3      | Hnf4g    | 0.849 |
| Id1      | Trim27   | 0.849 |
| Cd2ap    | Kat5     | 0.849 |
| Cd2ap    | Gata3    | 0.849 |
| Cdk6     | Rb1      | 0.849 |

|          |         |       |
|----------|---------|-------|
| Psmb4    | Rps27a  | 0.849 |
| Rac1     | Ppp2ca  | 0.849 |
| Plcb4    | Grm1    | 0.849 |
| Sod1     | Krt14   | 0.849 |
| Sod1     | Tnk2    | 0.849 |
| Sod1     | Fam175b | 0.849 |
| Sod1     | Reg1    | 0.849 |
| Lmnb1    | Rbx1    | 0.849 |
| Gtf2h1   | Trps1   | 0.849 |
| Traf6    | Ncoa3   | 0.849 |
| Traf6    | Smad2   | 0.849 |
| Rab3d    | Vdac2   | 0.849 |
| Pura     | Trim32  | 0.849 |
| Tle1     | Mycn    | 0.849 |
| Psen2    | Notch2  | 0.849 |
| Efs      | Ptk2b   | 0.849 |
| Egr2     | Pax6    | 0.849 |
| Mixl1    | Spdef   | 0.849 |
| Ncor2    | Gli2    | 0.849 |
| Cops8    | Cops5   | 0.849 |
| Nbr1     | Tnk2    | 0.849 |
| Nbr1     | Flt1    | 0.849 |
| Cenpv    | Psmc2   | 0.849 |
| Gsk3b    | Apc     | 0.849 |
| Gsk3b    | Ctnnb1  | 0.849 |
| Hbb-b1   | Ldha    | 0.849 |
| Cyld     | Cflar   | 0.849 |
| Akr1b3   | Cfl1    | 0.849 |
| Ncoa6    | Mdc1    | 0.849 |
| Phc3     | Gon4l   | 0.849 |
| Ubb      | Dlg1    | 0.849 |
| Fancd2   | Cacna1c | 0.849 |
| Fancd2   | Nbn     | 0.849 |
| Kat2b    | Myod1   | 0.849 |
| Cbl      | Inpp5d  | 0.849 |
| Smad4    | Pex6    | 0.849 |
| Mapk8    | Trp73   | 0.849 |
| Rps13    | Pdia6   | 0.849 |
| Hist3h2a | Tfdp1   | 0.849 |
| Gtf2b    | Gmnn    | 0.849 |
| Zfp277   | Lass2   | 0.849 |
| Bag1     | Pkm2    | 0.848 |
| Map2k4   | Itch    | 0.848 |
| Map2k4   | Tab1    | 0.848 |
| Shc1     | Dlg1    | 0.848 |
| Sorbs1   | Spna1   | 0.848 |

|         |         |       |
|---------|---------|-------|
| Sorbs1  | Eps8    | 0.848 |
| Sorbs1  | Cblc    | 0.848 |
| Epc1    | Gata4   | 0.848 |
| Rad51   | Msl1    | 0.848 |
| Rad51   | Nbn     | 0.848 |
| Itch    | Traf2   | 0.848 |
| Rnh1    | Id3     | 0.848 |
| Rnh1    | Aldoa   | 0.848 |
| Bcl11b  | Map2k7  | 0.848 |
| Bcl11b  | Ldhb    | 0.848 |
| Id2     | Phf17   | 0.848 |
| Id3     | Ubb     | 0.848 |
| Id1     | Cdk1    | 0.848 |
| Cd2ap   | Ldlr    | 0.848 |
| Cd2ap   | Nr3c1   | 0.848 |
| Homer2  | Grm1    | 0.848 |
| Psmb5   | Fam175b | 0.848 |
| Smad6   | Smurf1  | 0.848 |
| Phb2    | Lmb1    | 0.848 |
| Usp2    | Reg1    | 0.848 |
| Gtf2h1  | Tbx21   | 0.848 |
| Cdk5    | Cdk4    | 0.848 |
| Wdr1    | Leo1    | 0.848 |
| Ssbp3   | Lhx2    | 0.848 |
| Wwp2    | Gsc     | 0.848 |
| Traf6   | Ikkbg   | 0.848 |
| Rab3d   | Ptges3  | 0.848 |
| Ccdc101 | Mbip    | 0.848 |
| Tcf12   | Hhex    | 0.848 |
| Nr1i2   | Pias1   | 0.848 |
| Nr1i2   | Pawr    | 0.848 |
| Slc11a1 | Mapk3   | 0.848 |
| Psen2   | Atp1a3  | 0.848 |
| Mll1    | Dbp     | 0.848 |
| Max     | Lbr     | 0.848 |
| Zfp236  | Hnf4a   | 0.848 |
| Sqstm1  | Cyld    | 0.848 |
| Zap70   | Was     | 0.848 |
| Egr1    | Pparg   | 0.848 |
| Egr2    | Jak2    | 0.848 |
| Eya3    | Rel     | 0.848 |
| Prkce   | Irf5    | 0.848 |
| Aldoa   | Atp5a1  | 0.848 |
| Akr1b3  | Rpl22   | 0.848 |
| Akr1b3  | Rpl7    | 0.848 |
| Hspa5   | Nphp1   | 0.848 |

|         |          |       |
|---------|----------|-------|
| Pparg   | Cacna1c  | 0.848 |
| Pparg   | Rxra     | 0.848 |
| Ubb     | Smarce1  | 0.848 |
| Fancd2  | Hgs      | 0.848 |
| Syn2    | Ppp1r9b  | 0.848 |
| Grin2a  | Notch3   | 0.848 |
| Ubqln2  | Prkcsh   | 0.848 |
| Crocc   | Mapk8ip2 | 0.848 |
| Lef1    | Foxh1    | 0.848 |
| Lef1    | Jun      | 0.848 |
| Lef1    | Sumo1    | 0.848 |
| Bag1    | Stxbp1   | 0.847 |
| Bag1    | Actr1a   | 0.847 |
| Map2k6  | Sash1    | 0.847 |
| Ap1b1   | Hes1     | 0.847 |
| Mecp2   | Usf1     | 0.847 |
| Mecp2   | Neurog2  | 0.847 |
| Mecp2   | Zfp292   | 0.847 |
| Sorbs1  | Sorbs2   | 0.847 |
| Zfp467  | Stat1    | 0.847 |
| Epc1    | Csnk2a2  | 0.847 |
| Gpbp1   | Smyd2    | 0.847 |
| Spna1   | Sorbs2   | 0.847 |
| Dok2    | Bcr      | 0.847 |
| Bcl11b  | Nr1h4    | 0.847 |
| Sin3b   | Lbxcor1  | 0.847 |
| Id2     | Ubb      | 0.847 |
| Id2     | Ddx5     | 0.847 |
| Id3     | Map2k1   | 0.847 |
| Id3     | Med14    | 0.847 |
| Irf8    | Notch1   | 0.847 |
| Irf8    | Csf1r    | 0.847 |
| Id1     | Gtf2e2   | 0.847 |
| Id1     | Uchl1    | 0.847 |
| Cd2ap   | Lyn      | 0.847 |
| Psmb4   | Tbk1     | 0.847 |
| Usp2    | Psmc3    | 0.847 |
| Usp2    | Ulk1     | 0.847 |
| Kit     | Vav1     | 0.847 |
| Hist2h4 | Pbx4     | 0.847 |
| Hist2h4 | Mysm1    | 0.847 |
| Ahi1    | Krt42    | 0.847 |
| Barx2   | Fos      | 0.847 |
| Hnf1a   | Pawr     | 0.847 |
| Tcf12   | Rfx4     | 0.847 |
| Nr1i2   | Sirt2    | 0.847 |

|         |          |       |
|---------|----------|-------|
| Slc11a1 | Ntrk2    | 0.847 |
| Bcl6    | Tbrg1    | 0.847 |
| Mapt    | Tsnax    | 0.847 |
| Egr2    | Ep300    | 0.847 |
| Mixl1   | Sox15    | 0.847 |
| Stat3   | Jun      | 0.847 |
| Eya3    | Smyd2    | 0.847 |
| Nbr1    | Cacna1c  | 0.847 |
| Nbr1    | Atxn3    | 0.847 |
| Siah2   | Thra     | 0.847 |
| Cenpv   | Cdh13    | 0.847 |
| Ube2i   | Serbp1   | 0.847 |
| Aldoa   | Traf3ip2 | 0.847 |
| Snap25  | Hgs      | 0.847 |
| Sf3b2   | Vdr      | 0.847 |
| Notch2  | Notch3   | 0.847 |
| Pparg   | Ppargc1a | 0.847 |
| Ubb     | Nid2     | 0.847 |
| Ubb     | Olig2    | 0.847 |
| Itga5   | Atxn3    | 0.847 |
| Fancd2  | Tax1bp1  | 0.847 |
| Hmga1   | Cebpb    | 0.847 |
| Gtf3c1  | Gtf2b    | 0.847 |
| Gtf3c1  | Tbx21    | 0.847 |
| Cask    | Sh3gl3   | 0.847 |
| Fasn    | Phc2     | 0.847 |
| Bach1   | Zfp128   | 0.846 |
| Mapkbp1 | Map2k4   | 0.846 |
| Map2k4  | Irak1    | 0.846 |
| Mecp2   | Trip4    | 0.846 |
| Epha2   | Krt17    | 0.846 |
| Epha2   | Pkd1     | 0.846 |
| Ercc3   | Smad9    | 0.846 |
| Usf1    | Rarb     | 0.846 |
| Gpbp1   | Ifnar2   | 0.846 |
| Cited4  | Ss18     | 0.846 |
| Cited4  | Neurog2  | 0.846 |
| Rnh1    | Dnaja3   | 0.846 |
| Rnh1    | Krt73    | 0.846 |
| Rnh1    | Nid2     | 0.846 |
| Rnh1    | Eea1     | 0.846 |
| Id3     | Sfn      | 0.846 |
| Irf8    | Hras1    | 0.846 |
| Cd2ap   | Nck1     | 0.846 |
| Cd2ap   | H1f0     | 0.846 |
| Psmb5   | Zfp110   | 0.846 |

|        |         |       |
|--------|---------|-------|
| Psmb1  | Nucb1   | 0.846 |
| Usp2   | Bcl3    | 0.846 |
| Lmo2   | Lhx2    | 0.846 |
| Lmo2   | Lhx9    | 0.846 |
| Park2  | Bcl2    | 0.846 |
| Rab3d  | Mog     | 0.846 |
| Rab3d  | Rab3b   | 0.846 |
| Pura   | Hspa2   | 0.846 |
| Hnf1a  | Zfp110  | 0.846 |
| Skp1a  | Myog    | 0.846 |
| Ywhah  | Mark3   | 0.846 |
| Ccnd2  | Cdk2    | 0.846 |
| Psen2  | Notch4  | 0.846 |
| Mapt   | Herpud1 | 0.846 |
| Nbr1   | Bace1   | 0.846 |
| Nbr1   | Stam2   | 0.846 |
| Nbr1   | Myog    | 0.846 |
| Nbr1   | Arntl   | 0.846 |
| Nbr1   | Mdm4    | 0.846 |
| Ncam1  | Lrrk2   | 0.846 |
| Hbb-b1 | Atp5d   | 0.846 |
| Akr1b3 | Eif4b   | 0.846 |
| Sf3b2  | Myod1   | 0.846 |
| Pparg  | Trpc4   | 0.846 |
| Ncoa6  | Bmi1    | 0.846 |
| Ubb    | Psm11   | 0.846 |
| Ubb    | Actn1   | 0.846 |
| Fancd2 | Usp8    | 0.846 |
| Grin2c | Gria1   | 0.846 |
| Eif4e  | Eif3e   | 0.846 |
| Snpc4  | Med20   | 0.846 |
| Snpc4  | Zfp82   | 0.846 |
| Rps13  | Atp5d   | 0.846 |
| Rps13  | Gm5414  | 0.846 |
| Myc    | Cdkn2a  | 0.846 |
| Hhex   | Jun     | 0.846 |
| Sgcb   | Sgcb    | 0.846 |
| Cops3  | Cops6   | 0.845 |
| Bag1   | Rac1    | 0.845 |
| Mecp2  | Rarg    | 0.845 |
| Shc3   | Atxn2   | 0.845 |
| Psm4   | Krt10   | 0.845 |
| Shc1   | Fyn     | 0.845 |
| Sorbs3 | Rock2   | 0.845 |
| Epha2  | Amfr    | 0.845 |
| Rarg   | Tcf12   | 0.845 |

|          |          |       |
|----------|----------|-------|
| Rarg     | Hist3h2a | 0.845 |
| Ednra    | Yes1     | 0.845 |
| Rnh1     | Psmb4    | 0.845 |
| Rnh1     | Fabp1    | 0.845 |
| Bcl11b   | Stxbp1   | 0.845 |
| Sgca     | Flot1    | 0.845 |
| Actbl2   | Eif3b    | 0.845 |
| Actbl2   | Eif4b    | 0.845 |
| Per2     | Timeless | 0.845 |
| Id2      | E2f2     | 0.845 |
| Id2      | Cebpd    | 0.845 |
| Irf8     | Ddx41    | 0.845 |
| Raf1     | Sh3bp2   | 0.845 |
| Psmb5    | Calr     | 0.845 |
| Psmb5    | Gli3     | 0.845 |
| Rac1     | Hspa1b   | 0.845 |
| Usp2     | Fancd2   | 0.845 |
| Usp2     | Hgs      | 0.845 |
| Sod1     | Rps27a   | 0.845 |
| Sod1     | Aldoa    | 0.845 |
| Ywhab    | Mark3    | 0.845 |
| Pura     | Krt76    | 0.845 |
| Pura     | Ncor1    | 0.845 |
| Tle1     | Aebp2    | 0.845 |
| Tle1     | Hist4h4  | 0.845 |
| Tcf12    | Phf2     | 0.845 |
| Hist1h1a | Cdk1     | 0.845 |
| Egfr     | Jak2     | 0.845 |
| Sox2     | Sumo1    | 0.845 |
| Mtf2     | Lass5    | 0.845 |
| Mtf2     | Polr1a   | 0.845 |
| Sqstm1   | Zfp110   | 0.845 |
| Egr1     | E2f1     | 0.845 |
| Hist1h3f | Cdk1     | 0.845 |
| Cenpv    | Vdac2    | 0.845 |
| Aldoa    | Prdm16   | 0.845 |
| Akr1b3   | Ube2v2   | 0.845 |
| Tirap    | Cul5     | 0.845 |
| Ncoa6    | Zbtb33   | 0.845 |
| Ubb      | Stub1    | 0.845 |
| Dll4     | Dapk1    | 0.845 |
| Gtf3c1   | Iqgap1   | 0.845 |
| Lcp1     | Atxn2    | 0.845 |
| Ubqln2   | Hnrnpa1  | 0.845 |
| Trp53    | Mdm2     | 0.845 |
| VeZF1    | H2afx    | 0.845 |



|         |         |       |
|---------|---------|-------|
| Bag1    | Esr1    | 0.844 |
| Ap1b1   | Pcmt1   | 0.844 |
| Mecp2   | Hes1    | 0.844 |
| Mecp2   | Ercc8   | 0.844 |
| Mecp2   | Ddx20   | 0.844 |
| Shcbp1  | Edc4    | 0.844 |
| Psma4   | Nucb1   | 0.844 |
| Usf1    | Myocd   | 0.844 |
| Cited4  | Clock   | 0.844 |
| Rnh1    | Sik3    | 0.844 |
| Rnh1    | Krt17   | 0.844 |
| Rnh1    | Naca    | 0.844 |
| Id3     | Sfrs2   | 0.844 |
| Id3     | Uchl1   | 0.844 |
| Irf8    | Ube4b   | 0.844 |
| Id1     | Nupr1   | 0.844 |
| Raf1    | Kndc1   | 0.844 |
| Psmb5   | Myh9    | 0.844 |
| Psmb1   | Ipo9    | 0.844 |
| Usp2    | Ezh2    | 0.844 |
| Usp2    | Myog    | 0.844 |
| Sod1    | Flt1    | 0.844 |
| Lmnb1   | Keap1   | 0.844 |
| Six1    | Eya3    | 0.844 |
| Rab6    | Tfrc    | 0.844 |
| Rab3d   | Cnp     | 0.844 |
| Hist2h4 | Rps3    | 0.844 |
| Pura    | Tfdp1   | 0.844 |
| Ahi1    | Tuba1b  | 0.844 |
| Naglu   | Adam6b  | 0.844 |
| Keap1   | Sqstm1  | 0.844 |
| Irs1    | Irs2    | 0.844 |
| Mtf2    | Kdm5d   | 0.844 |
| Zfp236  | Arntl   | 0.844 |
| Flnc    | Nphp1   | 0.844 |
| Eya3    | Nf1     | 0.844 |
| Ezh1    | Jarid2  | 0.844 |
| Cenpv   | Ldha    | 0.844 |
| Aldoa   | Itpr1   | 0.844 |
| Aldoa   | Tfrc    | 0.844 |
| Ep300   | Trp53   | 0.844 |
| Pparg   | Hdac5   | 0.844 |
| Pparg   | Flot1   | 0.844 |
| Ncoa6   | Phc3    | 0.844 |
| Ncoa6   | Med14   | 0.844 |
| Robo1   | Ighmbp2 | 0.844 |

|         |         |       |
|---------|---------|-------|
| H1f0    | Inpp5d  | 0.844 |
| Dynll1  | Hnrnpm  | 0.844 |
| Numb    | Cdh1    | 0.844 |
| Mtor    | Rptor   | 0.844 |
| Casp8   | Slc1a2  | 0.844 |
| Casp8   | Csf1r   | 0.844 |
| Nrip1   | Rps5    | 0.844 |
| Bag1    | Epm2a   | 0.843 |
| Gtf2a1l | Spata24 | 0.843 |
| Shc1    | Kit     | 0.843 |
| Shc1    | Gab1    | 0.843 |
| Shc1    | Diap1   | 0.843 |
| Sorbs1  | Asb6    | 0.843 |
| Rnf41   | Irak1   | 0.843 |
| Epha2   | Sfrs2   | 0.843 |
| Epc1    | Mph1    | 0.843 |
| Cited4  | Sh3gl1  | 0.843 |
| Rnh1    | Flnc    | 0.843 |
| Actbl2  | Cand2   | 0.843 |
| Actbl2  | Hba-a1  | 0.843 |
| Id2     | E2f1    | 0.843 |
| Id3     | Krt8    | 0.843 |
| Id3     | Krt76   | 0.843 |
| Psmb5   | Polk    | 0.843 |
| Psmb4   | Zfp110  | 0.843 |
| Nedd9   | Myo18a  | 0.843 |
| Usp2    | Nr3c2   | 0.843 |
| Eif3b   | Rps13   | 0.843 |
| Sod1    | Alb     | 0.843 |
| Gtf2h1  | Zfp292  | 0.843 |
| Iqcb1   | Tubb5   | 0.843 |
| Ywhab   | Lrrk2   | 0.843 |
| Rab5b   | Map3k5  | 0.843 |
| Rab4a   | Srebf2  | 0.843 |
| Pura    | Syn1    | 0.843 |
| Barx2   | Jun     | 0.843 |
| Tcf12   | Hoxd13  | 0.843 |
| Naglu   | Tuba1b  | 0.843 |
| Slc11a1 | Phc3    | 0.843 |
| Mtf1    | Hoxb1   | 0.843 |
| Ndel1   | Nefh    | 0.843 |
| Sqstm1  | Ntrk1   | 0.843 |
| Egr2    | Tcp1    | 0.843 |
| Mixl1   | Med16   | 0.843 |
| Ezh2    | Arntl   | 0.843 |
| Prkce   | Gab1    | 0.843 |

|        |         |       |
|--------|---------|-------|
| Cyld   | Was     | 0.843 |
| Cyld   | Myd88   | 0.843 |
| Aldoa  | Myod1   | 0.843 |
| Aldoa  | Tax1bp1 | 0.843 |
| Akr1b3 | Ube2v1  | 0.843 |
| Akr1b3 | Hba-a1  | 0.843 |
| Akr1b3 | Eno3    | 0.843 |
| Tirap  | Insr    | 0.843 |
| Ep300  | Nr1h4   | 0.843 |
| Lin7c  | Cask    | 0.843 |
| Sf3b2  | Smad4   | 0.843 |
| Med1   | Med14   | 0.843 |
| Ubb    | Nphp1   | 0.843 |
| Fancd2 | Slc1a2  | 0.843 |
| Dbnl   | Fus     | 0.843 |
| Eef1a1 | Pdia6   | 0.843 |
| Rps13  | Nr1h4   | 0.843 |
| Myod1  | Tsc22d3 | 0.843 |
| Cdk2   | Cdkn1b  | 0.843 |
| Cdk2   | Cebpa   | 0.843 |
| Vezf1  | Sap18   | 0.843 |
| Mecp2  | Smad4   | 0.842 |
| Mecp2  | Med16   | 0.842 |
| Mecp2  | Fos     | 0.842 |
| Shc3   | Diap1   | 0.842 |
| Psm4   | Kpnb1   | 0.842 |
| Shc1   | Frs2    | 0.842 |
| Gabbr1 | Jakmip1 | 0.842 |
| Rarg   | Rarb    | 0.842 |
| Rad51  | Vav1    | 0.842 |
| Smc1b  | Smc3    | 0.842 |
| Phc1   | Scmh1   | 0.842 |
| Smad9  | Klf10   | 0.842 |
| Rnh1   | Phb2    | 0.842 |
| Rnh1   | Polr2b  | 0.842 |
| Id3    | Cops7b  | 0.842 |
| Cd2ap  | Fyn     | 0.842 |
| Tcerg1 | Cdk2    | 0.842 |
| Tcerg1 | Ctnna1  | 0.842 |
| Usp2   | Keap1   | 0.842 |
| Usp2   | Krt8    | 0.842 |
| Usp2   | Casp8   | 0.842 |
| Eif3b  | Hbb-b1  | 0.842 |
| Sod1   | Phf20   | 0.842 |
| Sod1   | Tubb5   | 0.842 |
| Crkl   | Clybl   | 0.842 |

|          |         |       |
|----------|---------|-------|
| Pcgf2    | Phc2    | 0.842 |
| Traf3    | Ltbr    | 0.842 |
| Rab3d    | Rab3c   | 0.842 |
| Rab3d    | Eno3    | 0.842 |
| Hist2h4  | Tada3   | 0.842 |
| Bub1     | Smc2    | 0.842 |
| Pura     | Pcna    | 0.842 |
| Zfp354a  | Sertad1 | 0.842 |
| Efs      | Sh3bp2  | 0.842 |
| Egr1     | Fbxw7   | 0.842 |
| Mixl1    | Hoxc12  | 0.842 |
| Mixl1    | Hoxa10  | 0.842 |
| Tmf1     | Hdac6   | 0.842 |
| Nbr1     | Rhoa    | 0.842 |
| Nbr1     | Msx2    | 0.842 |
| Nbr1     | Tbk1    | 0.842 |
| Prkcd    | Trim30  | 0.842 |
| Cenpv    | Sf3b1   | 0.842 |
| Akr1b3   | Fbln2   | 0.842 |
| Akr1b3   | Asap2   | 0.842 |
| Akr1b3   | Eif3e   | 0.842 |
| Tirap    | Tubb5   | 0.842 |
| Snap25   | Sgta    | 0.842 |
| Ubb      | Mapk1   | 0.842 |
| Fancd2   | Runx2   | 0.842 |
| Dynll1   | Aifm1   | 0.842 |
| Eef1a1   | Tubb5   | 0.842 |
| Gtf3c1   | Sap18   | 0.842 |
| Hist3h2a | Hoxa9   | 0.842 |
| Hist3h2a | Taf1b   | 0.842 |
| Hist3h2a | Cebpa   | 0.842 |
| Ubqln2   | Eno3    | 0.842 |
| Wwp1     | Actn4   | 0.842 |
| Mef2a    | Smad4   | 0.841 |
| Ap1b1    | Zbtb17  | 0.841 |
| Mecp2    | Zdhhc6  | 0.841 |
| Mecp2    | Ss18    | 0.841 |
| Gtf2a1l  | Spdef   | 0.841 |
| Sorbs1   | Flot1   | 0.841 |
| Epha2    | Rsrc1   | 0.841 |
| Epc1     | Kat2b   | 0.841 |
| Rarg     | Gata4   | 0.841 |
| Usf1     | Tle6    | 0.841 |
| Rnh1     | Psma1   | 0.841 |
| Rnh1     | Actg1   | 0.841 |
| Rnh1     | Efhd2   | 0.841 |

|          |          |       |
|----------|----------|-------|
| Actbl2   | Akr1b3   | 0.841 |
| Id3      | Prss1    | 0.841 |
| Id3      | Mysm1    | 0.841 |
| Cd2ap    | Pkd1     | 0.841 |
| Cul3     | Zbtb16   | 0.841 |
| Raf1     | Diap1    | 0.841 |
| Psmb5    | Flnc     | 0.841 |
| Usp2     | Pkd2     | 0.841 |
| Usp2     | ErbB2    | 0.841 |
| Usp2     | Phf20    | 0.841 |
| Eif3b    | Nrip1    | 0.841 |
| Mzf1     | Zfp768   | 0.841 |
| Abl1     | Rasa1    | 0.841 |
| Tle1     | Satb2    | 0.841 |
| Tle1     | Mapk3    | 0.841 |
| Naglu    | Thrap3   | 0.841 |
| Pias3    | Dnmt1    | 0.841 |
| Tipin    | Timeless | 0.841 |
| Grip1    | Kat2b    | 0.841 |
| Egr2     | Uimc1    | 0.841 |
| Bcl2     | Ppp1cc   | 0.841 |
| Gtf2e2   | Gtf2e1   | 0.841 |
| Tmf1     | Gsc      | 0.841 |
| Ncor2    | Rfxank   | 0.841 |
| Nbr1     | Mc4r     | 0.841 |
| Bhlhe41  | Pbx4     | 0.841 |
| Cenpv    | Cnp      | 0.841 |
| Mapk8ip3 | Mapk8ip2 | 0.841 |
| Akr1b3   | Calm2    | 0.841 |
| Akr1b3   | Ptrf     | 0.841 |
| Akr1b3   | Psmc5    | 0.841 |
| Sf3b2    | Kat2b    | 0.841 |
| Ubb      | Ddx5     | 0.841 |
| Ubb      | Ankhd1   | 0.841 |
| H1f0     | Rps6ka3  | 0.841 |
| Fancd2   | Fyn      | 0.841 |
| Fancd2   | Ccar1    | 0.841 |
| Fancd2   | Cebpa    | 0.841 |
| Dbnl     | Atxn2    | 0.841 |
| H1       | Cdk2     | 0.841 |
| Map3k5   | Cdk9     | 0.841 |
| Hba-a1   | Pdia6    | 0.841 |
| Gtf3c1   | H2afx    | 0.841 |
| Rps13    | Rpsa     | 0.841 |
| Hist3h2a | Clock    | 0.841 |
| Ubqln2   | Pcbp1    | 0.841 |

|         |           |       |
|---------|-----------|-------|
| Tceb1   | Socs2     | 0.841 |
| Wwp1    | Ngfr      | 0.841 |
| Tbp     | Dlx2      | 0.841 |
| Tbp     | Hoxa10    | 0.841 |
| Casp8   | Gli2      | 0.841 |
| Topbp1  | Lpxn      | 0.841 |
| Fau     | Bmi1      | 0.841 |
| Hif1a   | Egln3     | 0.841 |
| Trp73   | Trp63     | 0.841 |
| Bag1    | Atf4      | 0.84  |
| Bag1    | Dnaja1    | 0.84  |
| Syvn1   | Ncstn     | 0.84  |
| Sumo2   | Nfkbia    | 0.84  |
| Shc3    | Syngap1   | 0.84  |
| Pasma4  | Jup       | 0.84  |
| Sorbs1  | Arhgef7   | 0.84  |
| Als2    | Ntrk2     | 0.84  |
| Rarg    | Socs7     | 0.84  |
| Cited4  | Kat2a     | 0.84  |
| Cd40    | Traf2     | 0.84  |
| Rnh1    | Plec      | 0.84  |
| Rnh1    | Prdx1     | 0.84  |
| Bcl11b  | Ldha      | 0.84  |
| Id3     | Gfi1      | 0.84  |
| Id3     | Ncoa1     | 0.84  |
| Id3     | Cops6     | 0.84  |
| Id3     | Pi4ka     | 0.84  |
| Cd2ap   | Park7     | 0.84  |
| Rac1    | Dlg4      | 0.84  |
| Usp2    | Fam175b   | 0.84  |
| Usp2    | Hist2h2bb | 0.84  |
| Pcbd1   | Hnf1a     | 0.84  |
| Lmnb1   | Rorc      | 0.84  |
| Lmo2    | Zfp593    | 0.84  |
| Lmo2    | Csdc2     | 0.84  |
| Gtf2h1  | Mapk8     | 0.84  |
| Pcp2    | Ctnna1    | 0.84  |
| Rab3d   | Cenpv     | 0.84  |
| Pura    | Ccnd3     | 0.84  |
| Tle1    | Tef       | 0.84  |
| Tle1    | Mapk9     | 0.84  |
| Zfp354a | Cbx1      | 0.84  |
| Hnf1a   | Pax3      | 0.84  |
| Naglu   | Serpib7   | 0.84  |
| Nr1i2   | Hnf4g     | 0.84  |
| Efs     | Map1lc3b  | 0.84  |

|          |          |       |
|----------|----------|-------|
| Max      | Eif2a    | 0.84  |
| Mtf1     | Zfp275   | 0.84  |
| Prkaca   | Gck      | 0.84  |
| Egr2     | Psm2     | 0.84  |
| Birc2    | Map3k7   | 0.84  |
| Tmf1     | Smn1     | 0.84  |
| Tmf1     | Irf5     | 0.84  |
| Nbr1     | Mcl1     | 0.84  |
| Nbr1     | Cflar    | 0.84  |
| Nbr1     | Junb     | 0.84  |
| Cenpv    | Ptges3   | 0.84  |
| Hbb-b1   | Ptrf     | 0.84  |
| Aldoa    | Lgals3   | 0.84  |
| Sall4    | Ewsr1    | 0.84  |
| Ppargc1a | Ccnh     | 0.84  |
| Ncoa6    | Ppara    | 0.84  |
| Itpr1    | Ube4b    | 0.84  |
| Trim30   | Map1lc3a | 0.84  |
| Hba-a1   | Vdac2    | 0.84  |
| Gtf3c1   | Psme3    | 0.84  |
| Rps13    | Kcnd2    | 0.84  |
| Zfp277   | Olig2    | 0.84  |
| Foxh1    | Ing1     | 0.84  |
| Bag1     | Bcl11b   | 0.839 |
| Bag1     | Psmc2    | 0.839 |
| B2m      | Cflar    | 0.839 |
| Map2k4   | Ube2n    | 0.839 |
| Psm4     | Psmb4    | 0.839 |
| Psm4     | Rps27a   | 0.839 |
| Psm4     | Ipo9     | 0.839 |
| Sorbs1   | Pxn      | 0.839 |
| Sorbs1   | Bcar1    | 0.839 |
| Sorbs1   | Inpp5d   | 0.839 |
| Sorbs1   | Csf1r    | 0.839 |
| Rarg     | Ncoa1    | 0.839 |
| Cited4   | Ssbp3    | 0.839 |
| Cited4   | Myb      | 0.839 |
| Smad9    | Gjb6     | 0.839 |
| Rnh1     | Hnrnp2   | 0.839 |
| Rnh1     | Alb      | 0.839 |
| Bcl11b   | Eif2c2   | 0.839 |
| Actbl2   | Yaf2     | 0.839 |
| Id1      | Rel      | 0.839 |
| Cd2ap    | Eps8     | 0.839 |
| Ssbp2    | Lmo1     | 0.839 |
| Raf1     | Dlg2     | 0.839 |

|          |          |       |
|----------|----------|-------|
| Rac1     | Runx2    | 0.839 |
| Rev1     | Pcna     | 0.839 |
| Usp2     | Mdm4     | 0.839 |
| Sod1     | Nfkbia   | 0.839 |
| Lmnb1    | Strap    | 0.839 |
| Cdk5     | Cdk1     | 0.839 |
| Ptk2     | Ppp1ca   | 0.839 |
| Traf6    | Sqstm1   | 0.839 |
| Ahi1     | Krt15    | 0.839 |
| Ahi1     | Hspa9    | 0.839 |
| Rai14    | Isl2     | 0.839 |
| Rai14    | Sirt2    | 0.839 |
| Nr1i2    | Nr1i3    | 0.839 |
| Psen2    | Ryr2     | 0.839 |
| Efs      | Csn2     | 0.839 |
| Zbtb16   | Dnmt1    | 0.839 |
| Zfp236   | Dynll1   | 0.839 |
| Sla2     | Dok3     | 0.839 |
| Egr2     | Trp53    | 0.839 |
| Klc1     | Mapk8ip2 | 0.839 |
| Birc2    | Ube2n    | 0.839 |
| Ube2n    | Ikbkg    | 0.839 |
| Bace1    | Dlg1     | 0.839 |
| Ube2i    | Eif3i    | 0.839 |
| Gsk3b    | Lrrk2    | 0.839 |
| Aldoa    | Cops4    | 0.839 |
| Akr1b3   | Ckm      | 0.839 |
| Sf3b2    | Foxh1    | 0.839 |
| Med1     | Cdk1     | 0.839 |
| Pparg    | Ube4b    | 0.839 |
| Ppargc1a | Kat2b    | 0.839 |
| Ppara    | Trim24   | 0.839 |
| Ubb      | Tubb2c   | 0.839 |
| Pxn      | Mdk      | 0.839 |
| Irak1    | Nr0b2    | 0.839 |
| Grin2a   | Dlg2     | 0.839 |
| Rbx1     | Ptma     | 0.839 |
| Smad4    | Prdm16   | 0.839 |
| Smad2    | Prdm16   | 0.839 |
| Gtf3c1   | Sox15    | 0.839 |
| Rps13    | Nrip1    | 0.839 |
| Ubqln2   | Cand1    | 0.839 |
| Ubqln2   | Eprs     | 0.839 |
| Casp8    | Nos2     | 0.839 |
| Bat1a    | Tbk1     | 0.839 |
| Bag1     | Map3k1   | 0.838 |



|         |           |       |
|---------|-----------|-------|
| Map2k4  | Tab2      | 0.838 |
| Mecp2   | Kif2a     | 0.838 |
| Ptprq   | Cdh1      | 0.838 |
| Cyfp2   | Wasf2     | 0.838 |
| Usf1    | Ncoa1     | 0.838 |
| Krt10   | Actn1     | 0.838 |
| Sgca    | Ptrf      | 0.838 |
| Actbl2  | Ube2v1    | 0.838 |
| Actbl2  | Eif4a1    | 0.838 |
| Per2    | Usp2      | 0.838 |
| Id2     | Taf1b     | 0.838 |
| Id3     | Krt79     | 0.838 |
| Id3     | Med16     | 0.838 |
| Psmb4   | Krt2      | 0.838 |
| Eif3b   | Atp5d     | 0.838 |
| Eif3b   | Telo2     | 0.838 |
| Eif3b   | Kcnd2     | 0.838 |
| Sod1    | Acta1     | 0.838 |
| Sod1    | Hist2h2bb | 0.838 |
| Sod1    | Rer1      | 0.838 |
| Gtf2h1  | Hnf4g     | 0.838 |
| Hand2   | Hoxd13    | 0.838 |
| Hand1   | Fhl2      | 0.838 |
| Psen1   | Notch2    | 0.838 |
| Traf6   | Vcp       | 0.838 |
| Rab5b   | Rab4a     | 0.838 |
| Hist2h4 | Eif4a1    | 0.838 |
| Ccdc101 | Tada3     | 0.838 |
| Hnf1a   | Tox3      | 0.838 |
| Nr1i2   | Rnf19a    | 0.838 |
| Nr1i2   | Tgif1     | 0.838 |
| Pias3   | Nr0b2     | 0.838 |
| Mtf2    | Smarca1   | 0.838 |
| Zfp236  | Hoxd3     | 0.838 |
| Kat2a   | Csrp2bp   | 0.838 |
| Egr2    | Olig2     | 0.838 |
| Birc2   | Tmem115   | 0.838 |
| Birc3   | Sh3gl2    | 0.838 |
| Mixl1   | Stat2     | 0.838 |
| Mixl1   | Hoxa2     | 0.838 |
| Tmf1    | Pten      | 0.838 |
| Foxn2   | Sirt2     | 0.838 |
| Tbpl1   | Gmnn      | 0.838 |
| Ube2e3  | Ptma      | 0.838 |
| Akr1b3  | Eif4a1    | 0.838 |
| Tirap   | Irak1     | 0.838 |

|         |          |       |
|---------|----------|-------|
| Tirap   | Tceb2    | 0.838 |
| Pparg   | Spry4    | 0.838 |
| Ppara   | Rxra     | 0.838 |
| Ubb     | Taf1b    | 0.838 |
| Fancd2  | Tardbp   | 0.838 |
| Fancd2  | Dlg1     | 0.838 |
| Fancd2  | Nos2     | 0.838 |
| Dynll1  | Hnrnpf   | 0.838 |
| Grb2    | Csf1r    | 0.838 |
| Eef1a1  | Nf1      | 0.838 |
| Chmp5   | Epas1    | 0.838 |
| Ubqln2  | Alb      | 0.838 |
| Bag1    | Cul2     | 0.837 |
| Bag1    | Ppp1cc   | 0.837 |
| Mecp2   | Gsc      | 0.837 |
| Psma4   | Pcmt1    | 0.837 |
| Shc1    | Nedd4    | 0.837 |
| Trim66  | Lbr      | 0.837 |
| Rnh1    | Sfrs2    | 0.837 |
| Bcl11b  | Hist3h2a | 0.837 |
| Id3     | Sfrs1    | 0.837 |
| Id3     | Glud1    | 0.837 |
| Cul3    | Keap1    | 0.837 |
| Psmb5   | Krt14    | 0.837 |
| Psmb5   | Stam2    | 0.837 |
| Psmb5   | Actn4    | 0.837 |
| Psmb5   | Tbk1     | 0.837 |
| Usp2    | Map3k2   | 0.837 |
| Usp2    | Ngfr     | 0.837 |
| Eif3b   | Pdia6    | 0.837 |
| Lmnb1   | Ube2i    | 0.837 |
| Traip   | Irf1     | 0.837 |
| Rab5b   | Rab3a    | 0.837 |
| Rab3d   | Vdac1    | 0.837 |
| Hist2h4 | Ivns1abp | 0.837 |
| Pura    | Kat2b    | 0.837 |
| Gabrg2  | Ppp3ca   | 0.837 |
| Otx2    | Alx4     | 0.837 |
| Nr1i2   | Sap18    | 0.837 |
| Grm1    | Itpr1    | 0.837 |
| Mapt    | Tab2     | 0.837 |
| Mtf2    | Rps13    | 0.837 |
| Dnaja3  | Hspa9    | 0.837 |
| Zfp236  | Pax3     | 0.837 |
| Egr2    | Sgta     | 0.837 |
| Egr2    | Slc1a2   | 0.837 |

|          |         |       |
|----------|---------|-------|
| Birc2    | Diap1   | 0.837 |
| Mixl1    | Tbx21   | 0.837 |
| Nbr1     | Vim     | 0.837 |
| Nbr1     | Nfkbia  | 0.837 |
| Nbr1     | Gria1   | 0.837 |
| Prkcd    | Gria1   | 0.837 |
| Prkcd    | Actn2   | 0.837 |
| Trib2    | Reg1    | 0.837 |
| Atm      | Dnmt1   | 0.837 |
| Pparg    | Slc1a2  | 0.837 |
| Kdm4c    | Zfp592  | 0.837 |
| Ubb      | Brca1   | 0.837 |
| Tef      | Gtf2h2  | 0.837 |
| Fancd2   | Tab3    | 0.837 |
| Fancd2   | Hras1   | 0.837 |
| Map3k1   | Map2k7  | 0.837 |
| Hba-a1   | Rpl22   | 0.837 |
| Cblb     | Ticam1  | 0.837 |
| Gtf3c1   | Vav1    | 0.837 |
| Rps13    | Fus     | 0.837 |
| Rabl4    | Ift20   | 0.837 |
| Hist3h2a | Ppp2ca  | 0.837 |
| Ifrd1    | Mef2d   | 0.837 |
| Ubqln2   | Asap2   | 0.837 |
| Usp7     | Mdm4    | 0.837 |
| Bag1     | Hoxc8   | 0.836 |
| Bag1     | Pfn1    | 0.836 |
| Bag1     | Ptrf    | 0.836 |
| Bag1     | Slc25a3 | 0.836 |
| Mef2a    | Gli2    | 0.836 |
| Map2k6   | Tab3    | 0.836 |
| Mecp2    | Foxo3   | 0.836 |
| Shc1     | Nck1    | 0.836 |
| Sorbs1   | Tlr4    | 0.836 |
| Sorbs1   | Cblb    | 0.836 |
| Epha2    | Sik3    | 0.836 |
| Gpbp1    | Creb1   | 0.836 |
| Cited4   | Ssbp4   | 0.836 |
| Bcl11b   | Iqgap1  | 0.836 |
| Tcf3     | Id3     | 0.836 |
| Cry2     | Per2    | 0.836 |
| Id3      | Rpl4    | 0.836 |
| Id3      | Krt77   | 0.836 |
| Id3      | Bhlhe41 | 0.836 |
| Irf8     | Atxn3   | 0.836 |
| Psmb5    | Trim28  | 0.836 |

|        |         |       |       |
|--------|---------|-------|-------|
| Psmb1  | Ube2a   | 0.836 |       |
| Usp2   | Smurf1  | 0.836 |       |
| Usp2   | Ube4b   | 0.836 |       |
| Sod1   | Prss1   | 0.836 |       |
| Sod1   | Egr2    | 0.836 |       |
| Gtf2h1 | Csdc2   | 0.836 |       |
| Cdk5   | E2f1    | 0.836 |       |
| Six1   | Eya1    | 0.836 |       |
| Crkl   | Bcar1   | 0.836 |       |
| Mzf1   | Zscan2  | 0.836 |       |
| Jdp2   | Pbx4    | 0.836 |       |
|        | 5-Sep   | 2-Sep | 0.836 |
| Naglu  | Tubb5   | 0.836 |       |
| Naglu  | Hoxb9   | 0.836 |       |
| Btbd10 | Ttc3    | 0.836 |       |
| Efs    | Atxn2   | 0.836 |       |
| Esr1   | Ar      | 0.836 |       |
| Tlr4   | Cblb    | 0.836 |       |
| Sox2   | Irf1    | 0.836 |       |
| Mapt   | Gsc     | 0.836 |       |
| Mtf2   | Suz12   | 0.836 |       |
| Zfp236 | Zfp275  | 0.836 |       |
| Mixl1  | Nr4a1   | 0.836 |       |
| Nbr1   | Hgs     | 0.836 |       |
| Hbb-b1 | Irf3    | 0.836 |       |
| Hbb-b1 | Ticam1  | 0.836 |       |
| Ep300  | Kat2b   | 0.836 |       |
| Trip4  | Foxp1   | 0.836 |       |
| Zfp110 | Sh3gl2  | 0.836 |       |
| Zfpm1  | Ifrd1   | 0.836 |       |
| Fancd2 | Ppp2cb  | 0.836 |       |
| Syn2   | Vasp    | 0.836 |       |
| Git1   | Arhgef6 | 0.836 |       |
| Eef1a1 | Tubb6   | 0.836 |       |
| Smad2  | Sh3gl2  | 0.836 |       |
| Hba-a1 | Psmc5   | 0.836 |       |
| Suz12  | Sap18   | 0.836 |       |
| Ubqln2 | Rpl22   | 0.836 |       |
| Zfp277 | Tsc22d3 | 0.836 |       |
| Zfp277 | Csde1   | 0.836 |       |
| Mapk7  | Ptges3  | 0.836 |       |
| Vps11  | Stx6    | 0.836 |       |
| Syvn1  | Efhd2   | 0.835 |       |
| Map2k4 | Ecsit   | 0.835 |       |
| Mecp2  | Etv6    | 0.835 |       |
| Sorbs1 | Egfr    | 0.835 |       |

|         |         |       |
|---------|---------|-------|
| Sorbs1  | Pdlim7  | 0.835 |
| Creb3l4 | Anapc7  | 0.835 |
| Epha2   | Pkp1    | 0.835 |
| Epha2   | Zdhhc13 | 0.835 |
| Rad51   | Rps6ka3 | 0.835 |
| Rnh1    | Tpi1    | 0.835 |
| Rnh1    | Hspa9   | 0.835 |
| Bcl11b  | Gtf2b   | 0.835 |
| Myl9    | Epas1   | 0.835 |
| Actbl2  | Ckm     | 0.835 |
| Id3     | Zdhhc13 | 0.835 |
| Psmb5   | Krt77   | 0.835 |
| Psmb5   | Hsp90b1 | 0.835 |
| Psmb1   | Ndufa4  | 0.835 |
| Usp2    | Rela    | 0.835 |
| Sod1    | Mycn    | 0.835 |
| Cdk5    | Ccnb1   | 0.835 |
| Park2   | Bax     | 0.835 |
| Traf2   | Ube2d3  | 0.835 |
| Rab5b   | Ywhaq   | 0.835 |
| Hist2h4 | Trip4   | 0.835 |
| Pura    | Rps6    | 0.835 |
| Pura    | Kif5b   | 0.835 |
| Rai14   | Trip4   | 0.835 |
| Ldb2    | Lmo3    | 0.835 |
| Zfp354a | Isl2    | 0.835 |
| Naglu   | Krt42   | 0.835 |
| Keap1   | Ptma    | 0.835 |
| Efs     | Bcar1   | 0.835 |
| Efs     | Diap1   | 0.835 |
| Inadl   | Grin2a  | 0.835 |
| Sox2    | Uimc1   | 0.835 |
| Mtf1    | Arntl   | 0.835 |
| Mtf2    | C1qbp   | 0.835 |
| Zfp236  | Hoxb1   | 0.835 |
| Cacng2  | Gria2   | 0.835 |
| Tmf1    | Rhoa    | 0.835 |
| Nbr1    | Gli2    | 0.835 |
| Aldoa   | Slc1a2  | 0.835 |
| Akr1b3  | Ldha    | 0.835 |
| Ppard   | Trim24  | 0.835 |
| Ubb     | Pcna    | 0.835 |
| Thoc4   | Vcp     | 0.835 |
| Trim30  | Mapk3   | 0.835 |
| Rps13   | Prkcsh  | 0.835 |
| Ifrd1   | Tal1    | 0.835 |

|           |          |       |
|-----------|----------|-------|
| Ccna1     | Cdk2     | 0.835 |
| Irf3      | Tbk1     | 0.835 |
| Nrip1     | Ap2m1    | 0.835 |
| Nrip1     | Rps3     | 0.835 |
| Syvn1     | Eea1     | 0.834 |
| Map2k6    | Tab2     | 0.834 |
| Psma4     | Aifm1    | 0.834 |
| Shc1      | Grin1    | 0.834 |
| Col5a1    | Smad4    | 0.834 |
| Usf1      | Sfpi1    | 0.834 |
| Gpbp1     | Sertad2  | 0.834 |
| Rad51     | Gata3    | 0.834 |
| Cited4    | Ewsr1    | 0.834 |
| Ncstn     | Herpud1  | 0.834 |
| Rnh1      | Psma7    | 0.834 |
| Rnh1      | Atp5d    | 0.834 |
| Bcl11b    | Atf2     | 0.834 |
| Actbl2    | Pik3ca   | 0.834 |
| Id2       | Pcna     | 0.834 |
| Id2       | Ccna1    | 0.834 |
| Id3       | Tubb2a   | 0.834 |
| Id3       | Hnrnpf   | 0.834 |
| Psmb4     | Myog     | 0.834 |
| Rnf2      | Runx1    | 0.834 |
| Tcerg1    | Mdm2     | 0.834 |
| LOC677235 | Dclk2    | 0.834 |
| Usp2      | Pklr     | 0.834 |
| Eif3b     | Anxa1    | 0.834 |
| Eif3b     | Eif2a    | 0.834 |
| Sod1      | Skil     | 0.834 |
| Lmo2      | Pitx2    | 0.834 |
| Crk       | Irs1     | 0.834 |
| Lbxcor1   | Hdac1    | 0.834 |
| Traf2     | Map3k1   | 0.834 |
| Ahi1      | Hsp90ab1 | 0.834 |
| Tle1      | Clock    | 0.834 |
| Nr1i2     | Rorb     | 0.834 |
| Slc11a1   | Mph1     | 0.834 |
| Tlr4      | Bcl10    | 0.834 |
| Tlr4      | Ube2n    | 0.834 |
| Max       | Ccna1    | 0.834 |
| Max       | Trp53    | 0.834 |
| Myh3      | Neur12   | 0.834 |
| Birc2     | Map3k1   | 0.834 |
| Tmf1      | Stam2    | 0.834 |
| Eya3      | Pbx1     | 0.834 |

|          |          |       |
|----------|----------|-------|
| Dab1     | Was      | 0.834 |
| Nbr1     | Smurf1   | 0.834 |
| Nbr1     | Psmc3    | 0.834 |
| Nbr1     | Uimc1    | 0.834 |
| Prkcb    | Rps6ka3  | 0.834 |
| Prkcd    | Ntrk2    | 0.834 |
| Bhlhe41  | Pdcd6    | 0.834 |
| Cenpv    | Slc25a3  | 0.834 |
| Cenpv    | Uqcrc1   | 0.834 |
| Ppp2r1a  | Ppp2ca   | 0.834 |
| Cyld     | Ntrk1    | 0.834 |
| Akr1b3   | Dsp      | 0.834 |
| Akr1b3   | Atp5d    | 0.834 |
| Pparg    | Cdkn2a   | 0.834 |
| Trip4    | Mafk     | 0.834 |
| Phc3     | Bmi1     | 0.834 |
| Mafk     | Nfe2     | 0.834 |
| Dbnl     | Gab2     | 0.834 |
| Dynll1   | Pafah1b1 | 0.834 |
| Hba-a1   | Palm     | 0.834 |
| Hba-a1   | Efhd2    | 0.834 |
| Gria1    | Gria2    | 0.834 |
| Mapk8    | Daxx     | 0.834 |
| Vezf1    | Atxn2    | 0.834 |
| Socs2    | Lepr     | 0.834 |
| Bag1     | Hsp90ab1 | 0.833 |
| Bag1     | Syn1     | 0.833 |
| Map2k6   | Bcl10    | 0.833 |
| Mecp2    | Kat2a    | 0.833 |
| Mecp2    | Stag2    | 0.833 |
| Mecp2    | Ncor2    | 0.833 |
| Arhgap32 | Rac1     | 0.833 |
| Psmc4    | Myh9     | 0.833 |
| Shc1     | Dusp2    | 0.833 |
| Shc1     | Ptpn11   | 0.833 |
| Shc1     | Map1lc3b | 0.833 |
| Epha2    | Glud1    | 0.833 |
| Epc1     | Myocd    | 0.833 |
| Flna     | Rps27a   | 0.833 |
| Usf1     | Cebpa    | 0.833 |
| Gpbp1    | Rxrg     | 0.833 |
| Rph3al   | Rims1    | 0.833 |
| Rad51    | Gtf3c1   | 0.833 |
| Cited4   | Mtf1     | 0.833 |
| Cited4   | Hoxa2    | 0.833 |
| Ednra    | Arrb1    | 0.833 |

|         |         |       |
|---------|---------|-------|
| Itch    | Smad2   | 0.833 |
| Bcl11b  | Dnajb1  | 0.833 |
| Myl9    | Tada3   | 0.833 |
| Actbl2  | Cenpv   | 0.833 |
| Cry1    | Per3    | 0.833 |
| Id2     | Psme3   | 0.833 |
| Id3     | Trip4   | 0.833 |
| Irf8    | Runx2   | 0.833 |
| Id1     | Bhlhe41 | 0.833 |
| Psmb5   | Reg1    | 0.833 |
| Usp2    | Itga5   | 0.833 |
| Eif3b   | Eif3e   | 0.833 |
| Sod1    | Nr1h3   | 0.833 |
| Sod1    | Tuba1b  | 0.833 |
| Pkd2    | Herpud1 | 0.833 |
| Traf2   | Ikbkg   | 0.833 |
| Hist2h4 | Rpl4    | 0.833 |
| Hist2h4 | Lass2   | 0.833 |
| Pura    | Ctnnd1  | 0.833 |
| Zfp354a | Foxq1   | 0.833 |
| Tcf12   | Neurog2 | 0.833 |
| Cbx3    | Trim28  | 0.833 |
| Naglu   | Hsp90b1 | 0.833 |
| Naglu   | Nefm    | 0.833 |
| Pdia3   | Slc25a3 | 0.833 |
| Cops2   | Gsk3b   | 0.833 |
| Efs     | Khdrbs1 | 0.833 |
| Bcl6    | Ppp1r9b | 0.833 |
| Max     | Atm     | 0.833 |
| Mtf2    | Nkd2    | 0.833 |
| Ncoa3   | Rnf19a  | 0.833 |
| Foxn2   | Zfp277  | 0.833 |
| Nbr1    | Vdac1   | 0.833 |
| Ncam1   | Apoe    | 0.833 |
| Bhlhe41 | Prpf31  | 0.833 |
| Cenpv   | Yaf2    | 0.833 |
| Ube2i   | Phf17   | 0.833 |
| Ube2i   | Sumo1   | 0.833 |
| Zfp768  | Zfp473  | 0.833 |
| Hbb-b1  | Ubqln2  | 0.833 |
| Aldoa   | Tuba4a  | 0.833 |
| Ep300   | Cebpa   | 0.833 |
| Trip4   | Ubb     | 0.833 |
| H1f0    | Sap18   | 0.833 |
| H1f0    | H2afx   | 0.833 |
| Dynll1  | Rcn2    | 0.833 |



|        |         |       |
|--------|---------|-------|
| Cops7b | Gps1    | 0.833 |
| Map3k7 | Ikbkg   | 0.833 |
| Wnt1   | Fzd8    | 0.833 |
| Hba-a1 | Telo2   | 0.833 |
| Rps13  | Fbln2   | 0.833 |
| Ppp1cc | Cdk2    | 0.833 |
| Zfp277 | Gtf2f1  | 0.833 |
| Ppp2ca | Ppp2r3a | 0.833 |
| Gab1   | Cdh1    | 0.833 |
| Casp8  | Ddx41   | 0.833 |
| Topbp1 | Fbxo28  | 0.833 |
| Bag1   | Stat3   | 0.832 |
| B2m    | Tbk1    | 0.832 |
| Bach1  | Zmym2   | 0.832 |
| Mecp2  | Pds5a   | 0.832 |
| Psma4  | Mms19   | 0.832 |
| Psma4  | Rcn2    | 0.832 |
| Sorbs1 | Kit     | 0.832 |
| Sorbs1 | Efs     | 0.832 |
| Sorbs1 | Bcl2    | 0.832 |
| Pik3r1 | Csf1r   | 0.832 |
| Krt10  | Mtap2   | 0.832 |
| Rad51  | Atm     | 0.832 |
| Rad51  | H1f0    | 0.832 |
| Cited4 | Ep300   | 0.832 |
| Cited4 | Hnf4a   | 0.832 |
| Rnh1   | Eprs    | 0.832 |
| Bcl11b | Vav1    | 0.832 |
| Per1   | Usp2    | 0.832 |
| Id2    | Neurog2 | 0.832 |
| Id2    | Rfx4    | 0.832 |
| Irf8   | Nos2    | 0.832 |
| Psbm5  | Fancd2  | 0.832 |
| Psbm5  | Mdm4    | 0.832 |
| Psbm4  | Tubb5   | 0.832 |
| Psbm1  | Flnc    | 0.832 |
| Psbm1  | Exoc4   | 0.832 |
| Usp2   | Adrbk1  | 0.832 |
| Eif3b  | Rps6    | 0.832 |
| Eif3b  | Rpl22   | 0.832 |
| Sod1   | Stam2   | 0.832 |
| Sod1   | Psm2    | 0.832 |
| Traf3  | Map3k1  | 0.832 |
| Rab7   | Ywhag   | 0.832 |
| Zfp369 | Zfp110  | 0.832 |
| Pura   | Ywhah   | 0.832 |

|          |         |       |
|----------|---------|-------|
| Tcf12    | Pbx4    | 0.832 |
| Naglu    | Calm2   | 0.832 |
| Naglu    | Hspa9   | 0.832 |
| Orc2l    | Zfp592  | 0.832 |
| Nr1i2    | Lgals3  | 0.832 |
| Slc11a1  | Sqstm1  | 0.832 |
| Pias3    | Gmnn    | 0.832 |
| Tlr4     | Birc3   | 0.832 |
| Mapt     | Tmf1    | 0.832 |
| Mtf2     | Asb6    | 0.832 |
| Pou2f1   | Tle4    | 0.832 |
| Birc3    | Casp3   | 0.832 |
| Mixl1    | Hoxd13  | 0.832 |
| Mixl1    | Nkd2    | 0.832 |
| Prkcd    | Ulk1    | 0.832 |
| Prkce    | Kdr     | 0.832 |
| Hbb-b1   | Eno3    | 0.832 |
| Cbx5     | Hist4h4 | 0.832 |
| Zfp473   | Zfp275  | 0.832 |
| Pparg    | Smad2   | 0.832 |
| Pparg    | Spry1   | 0.832 |
| Pparg    | Hdac3   | 0.832 |
| Pparg    | Ctnnb1  | 0.832 |
| Ubb      | Thrap3  | 0.832 |
| Fancd2   | Hdac5   | 0.832 |
| Fancd2   | Foxo3   | 0.832 |
| Fancd2   | Ddx41   | 0.832 |
| Syn2     | Hdac1   | 0.832 |
| Syn2     | Nos1    | 0.832 |
| Grin2a   | Dll1    | 0.832 |
| Cebpd    | Lass2   | 0.832 |
| Trim30   | Ngfr    | 0.832 |
| Cblb     | Myd88   | 0.832 |
| Blnk     | Elk1    | 0.832 |
| Hist3h2a | E2f6    | 0.832 |
| Gtf2b    | Tbp     | 0.832 |
| Arrb2    | Usp7    | 0.832 |
| Tceb2    | Wsb1    | 0.832 |
| Hoxa9    | Phf17   | 0.832 |
| Fzr1     | Aurka   | 0.832 |
| Wwp1     | Tax1bp1 | 0.832 |
| Casp8    | Fos     | 0.832 |
| Nxt1     | Nxf1    | 0.832 |
| Map2k4   | Birc2   | 0.831 |
| Mecp2    | Stat5a  | 0.831 |
| Mecp2    | Nfya    | 0.831 |

|         |         |       |
|---------|---------|-------|
| Gtf2a1l | Meis2   | 0.831 |
| Shc1    | Pag1    | 0.831 |
| Sorbs1  | ErbB2   | 0.831 |
| Rnf41   | Myd88   | 0.831 |
| Epha2   | Naglu   | 0.831 |
| Epha2   | Dsp     | 0.831 |
| Epc1    | Sfpi1   | 0.831 |
| Flna    | Tuba1b  | 0.831 |
| Rad51   | Nde1    | 0.831 |
| Smad9   | Mxi1    | 0.831 |
| Esrrb   | Tbp     | 0.831 |
| Rnh1    | Dnaja2  | 0.831 |
| Bcl11b  | Foxp1   | 0.831 |
| Id2     | Polr1a  | 0.831 |
| Id3     | Naglu   | 0.831 |
| Id3     | Cdk1    | 0.831 |
| Id1     | Smad2   | 0.831 |
| Psmb4   | Actn4   | 0.831 |
| Phb2    | Myod1   | 0.831 |
| Sod1    | Pkd2    | 0.831 |
| Sod1    | Nbr1    | 0.831 |
| Sod1    | Mc4r    | 0.831 |
| Sod1    | Krt42   | 0.831 |
| Lmnb1   | Nup153  | 0.831 |
| Mzf1    | Zfp473  | 0.831 |
| Rab7    | Tnpo1   | 0.831 |
| Hist2h4 | Smarce1 | 0.831 |
| Hist2h4 | Satb1   | 0.831 |
| Rai14   | Rnf14   | 0.831 |
| Nr1i2   | Thrb    | 0.831 |
| Ccnd1   | Cdk4    | 0.831 |
| Mapt    | Stat1   | 0.831 |
| Egr2    | Map3k2  | 0.831 |
| Egr2    | Vamp2   | 0.831 |
| Per3    | Clock   | 0.831 |
| Gsc     | Pparg   | 0.831 |
| Nbr1    | Foxo3   | 0.831 |
| Nbr1    | Csf1r   | 0.831 |
| Prkce   | Ppp3ca  | 0.831 |
| Cenpv   | Ndufa9  | 0.831 |
| Ube2i   | Pdlim4  | 0.831 |
| Rb1     | Psmc10  | 0.831 |
| Dnajc1  | Hsp90b1 | 0.831 |
| Aldoa   | Map3k1  | 0.831 |
| Aldoa   | Nphp1   | 0.831 |
| Aldoa   | Alb     | 0.831 |

|         |          |       |
|---------|----------|-------|
| Akr1b3  | Cand1    | 0.831 |
| Foxa1   | Dlx1     | 0.831 |
| Notch2  | Sufu     | 0.831 |
| Pparg   | Vamp2    | 0.831 |
| Rhoq    | Cblb     | 0.831 |
| Uba52   | Map2k7   | 0.831 |
| Ubb     | Map1lc3a | 0.831 |
| Dbnl    | Vav1     | 0.831 |
| Dynll1  | Krt78    | 0.831 |
| Dynll1  | Nphp1    | 0.831 |
| Suz12   | Rpl28    | 0.831 |
| Rps13   | Telo2    | 0.831 |
| Pcna    | Ppp1cc   | 0.831 |
| Rpl7    | Eif3e    | 0.831 |
| Casp8   | Fau      | 0.831 |
| Bat1a   | Ngfr     | 0.831 |
| Bag1    | Mapk8    | 0.83  |
| B2m     | Zfp110   | 0.83  |
| Mapkbp1 | Atf2     | 0.83  |
| Tnfaip3 | Traf2    | 0.83  |
| Trim26  | Phf20    | 0.83  |
| Axin2   | Apc      | 0.83  |
| Rnh1    | Dnaja1   | 0.83  |
| Rnh1    | Naglu    | 0.83  |
| Rnh1    | Amfr     | 0.83  |
| Rnh1    | Krt76    | 0.83  |
| Bcl11b  | Nr3c1    | 0.83  |
| Per1    | Per2     | 0.83  |
| Per1    | Timeless | 0.83  |
| Id3     | Yeats2   | 0.83  |
| Id3     | Prpf31   | 0.83  |
| Cd2ap   | Ssbp3    | 0.83  |
| Psmb5   | Actg1    | 0.83  |
| Psmb5   | Phf20    | 0.83  |
| Psmb5   | Was      | 0.83  |
| Psmb4   | Pkd2     | 0.83  |
| Psmb1   | Tubb6    | 0.83  |
| Psmb1   | Myo1c    | 0.83  |
| Usp2    | Becn1    | 0.83  |
| Eif3b   | Rps16    | 0.83  |
| Eif3b   | G3bp1    | 0.83  |
| Eif3b   | Cand2    | 0.83  |
| Eif3b   | Hba-a1   | 0.83  |
| Eif3b   | Ube2v2   | 0.83  |
| Sod1    | Erbp2    | 0.83  |
| Sod1    | Msx2     | 0.83  |

|          |           |       |
|----------|-----------|-------|
| Lmnb1    | Tnpo1     | 0.83  |
| Lmnb1    | Ddx3y     | 0.83  |
| Six1     | Neurod1   | 0.83  |
| Hist2h4  | Myod1     | 0.83  |
| Nr1i2    | Setdb1    | 0.83  |
| Egr2     | Ilk       | 0.83  |
| Birc2    | Tnip3     | 0.83  |
| Tmf1     | Fyn       | 0.83  |
| Tmf1     | Was       | 0.83  |
| Nbr1     | Camk1     | 0.83  |
| Nbr1     | Hist2h2bb | 0.83  |
| Ncam1    | Mog       | 0.83  |
| Bhlhe41  | Psme3     | 0.83  |
| Cenpv    | Ckm       | 0.83  |
| Cenpv    | Cbx7      | 0.83  |
| Ppp2r1a  | Ppp2r3a   | 0.83  |
| Ube2i    | Pax6      | 0.83  |
| Cyld     | Rela      | 0.83  |
| Aldoa    | Calm2     | 0.83  |
| Akr1b3   | Tubb5     | 0.83  |
| Akr1b3   | Hnrnpk    | 0.83  |
| Tirap    | Bclaf1    | 0.83  |
| Ep300    | Foxo3     | 0.83  |
| Atg16l1  | Ulk1      | 0.83  |
| Pparg    | Ikbkg     | 0.83  |
| Pparg    | Tardbp    | 0.83  |
| Pparg    | Rxrg      | 0.83  |
| Kdm4c    | Actn2     | 0.83  |
| Ubb      | Myo1c     | 0.83  |
| Thoc4    | Kat2b     | 0.83  |
| Arntl    | Clock     | 0.83  |
| Polr1b   | Zfp592    | 0.83  |
| Sufu     | Hist1h2ai | 0.83  |
| Stub1    | Atxn3     | 0.83  |
| Blnk     | Ctnn      | 0.83  |
| Suz12    | Vdac2     | 0.83  |
| Rps13    | Ubqln2    | 0.83  |
| Hist3h2a | Rpsa      | 0.83  |
| Hist3h2a | Sf3b1     | 0.83  |
| Mlst8    | Mtor      | 0.83  |
| Ppp5c    | Dmrtc2    | 0.83  |
| Gab1     | Cav3      | 0.83  |
| Topbp1   | Elf1      | 0.83  |
| Zfp263   | Mzf1      | 0.829 |
| Spna2    | Ncam1     | 0.829 |
| Gtf2a1l  | Id3       | 0.829 |

|         |             |       |
|---------|-------------|-------|
| Gtf2a1l | Meis1       | 0.829 |
| Shc1    | Hck         | 0.829 |
| Shc1    | Ptk2b       | 0.829 |
| Sorbs1  | Abl1        | 0.829 |
| Creb3l4 | Smc2        | 0.829 |
| Epc1    | Pcgf1       | 0.829 |
| Cited4  | Tle1        | 0.829 |
| Cited4  | Csk         | 0.829 |
| Bcl11b  | Usp9x       | 0.829 |
| Bcl11b  | Kat2b       | 0.829 |
| Id2     | Ccnb1       | 0.829 |
| Id2     | Eif2a       | 0.829 |
| Id3     | 2210010C04l | 0.829 |
| Id3     | Ndufa4      | 0.829 |
| Id3     | Ascl1       | 0.829 |
| Cd2ap   | Bax         | 0.829 |
| Psmb5   | Tsnax       | 0.829 |
| Psmb1   | Hsph1       | 0.829 |
| Psmb1   | Aifm1       | 0.829 |
| Tcerg1  | Kcnd2       | 0.829 |
| Usp2    | Sgta        | 0.829 |
| Eif3b   | Dsp         | 0.829 |
| Sod1    | Hspa9       | 0.829 |
| Sod1    | Ldha        | 0.829 |
| Lmnb1   | Ywhag       | 0.829 |
| Lmnb1   | Hnrnph2     | 0.829 |
| Polk    | Mad2l2      | 0.829 |
| Traf2   | Ripk1       | 0.829 |
| Sos1    | Spry4       | 0.829 |
| Hnf1a   | Snopc4      | 0.829 |
| Atf3    | Hdac3       | 0.829 |
| Mapt    | Dlg3        | 0.829 |
| Egr1    | Bhlhe41     | 0.829 |
| Lbr     | Cbx5        | 0.829 |
| Bcl2l1  | Ppp1cc      | 0.829 |
| Stat3   | Csf1r       | 0.829 |
| Gsc     | Gli3        | 0.829 |
| Ezh2    | Setx        | 0.829 |
| Nbr1    | Cyld        | 0.829 |
| Nbr1    | Skil        | 0.829 |
| Nbr1    | Notch1      | 0.829 |
| Bhlhe41 | Trim27      | 0.829 |
| Hbb-b1  | Uqcrc1      | 0.829 |
| Sf3b2   | Hoxa13      | 0.829 |
| Map3k7  | Myd88       | 0.829 |
| Eif4a1  | Cfl1        | 0.829 |

|         |         |       |
|---------|---------|-------|
| Eif4a1  | Fbln2   | 0.829 |
| Eef1a1  | Tuba1a  | 0.829 |
| Smad2   | Sykb    | 0.829 |
| Smad2   | Ctnnb1  | 0.829 |
| Smad3   | Rela    | 0.829 |
| Snopc4  | Polr1a  | 0.829 |
| Hba-a1  | Ube2v2  | 0.829 |
| Hba-a1  | Ptrf    | 0.829 |
| Hba-a1  | Eea1    | 0.829 |
| Hba-a1  | Eno3    | 0.829 |
| Hba-a1  | Asap2   | 0.829 |
| Rnf170  | Erlin2  | 0.829 |
| Gtf3c1  | Dlx5    | 0.829 |
| Suz12   | Slc25a3 | 0.829 |
| Rps13   | Psmc3   | 0.829 |
| Zfp277  | Pdlim4  | 0.829 |
| Tceb2   | Asb2    | 0.829 |
| Ppp5c   | Cttn    | 0.829 |
| Fasn    | Strap   | 0.829 |
| Sox8    | Jun     | 0.829 |
| Bach1   | Mxi1    | 0.828 |
| Mecp2   | Rarb    | 0.828 |
| Mecp2   | Hdac10  | 0.828 |
| Ttc7b   | Pi4ka   | 0.828 |
| Gtf2a1l | Wwp1    | 0.828 |
| Shc1    | Sos1    | 0.828 |
| Shc1    | Bcr     | 0.828 |
| Sorbs3  | Braf    | 0.828 |
| Epc1    | Med14   | 0.828 |
| Usf1    | Gata4   | 0.828 |
| Dok2    | Inpp5d  | 0.828 |
| Cul1    | Skp1a   | 0.828 |
| Rnh1    | Try5    | 0.828 |
| Rnh1    | Sod1    | 0.828 |
| Rnh1    | Ahi1    | 0.828 |
| Rnh1    | Cct3    | 0.828 |
| Rnh1    | Anxa1   | 0.828 |
| Rnh1    | Hspb1   | 0.828 |
| Bcl11b  | Plp1    | 0.828 |
| Actbl2  | Scmh1   | 0.828 |
| Cd2ap   | Zap70   | 0.828 |
| Ngly1   | Amfr    | 0.828 |
| Psmb5   | Cflar   | 0.828 |
| Psmb5   | Sykb    | 0.828 |
| Psmb5   | Cdh1    | 0.828 |
| Rac1    | Dlg1    | 0.828 |

|        |        |       |
|--------|--------|-------|
| Ankrd1 | Ttn    | 0.828 |
| Tcerg1 | Klf4   | 0.828 |
| Usp2   | Apc    | 0.828 |
| Eif3b  | Purb   | 0.828 |
| Eif3b  | Tceb1  | 0.828 |
| Eif3b  | Eno3   | 0.828 |
| Sod1   | Atp5b  | 0.828 |
| Lmo2   | Isl2   | 0.828 |
| Iqcb1  | Myh9   | 0.828 |
| Krt14  | Ahi1   | 0.828 |
| Rab7   | Ik     | 0.828 |
| Rab3d  | Suz12  | 0.828 |
| Pura   | Arid1b | 0.828 |
| Pura   | Rps3   | 0.828 |
| Rai14  | Med16  | 0.828 |
| Polh   | Pcna   | 0.828 |
| Max    | Tuba1a | 0.828 |
| Zfp236 | Pparg  | 0.828 |
| Zfp236 | Fos    | 0.828 |
| Myh3   | Cryge  | 0.828 |
| Egr2   | Dab1   | 0.828 |
| Tle4   | Aes    | 0.828 |
| Tmf1   | Jak3   | 0.828 |
| Nbr1   | Bcr    | 0.828 |
| Nbr1   | Pdgfrb | 0.828 |
| Prkcd  | Gria2  | 0.828 |
| Rb1    | E2f1   | 0.828 |
| Mcl1   | Fbxw7  | 0.828 |
| Hbb-b1 | Ldhb   | 0.828 |
| Aldoa  | Taf15  | 0.828 |
| Aldoa  | Psmc2  | 0.828 |
| Aldoa  | Tubb2c | 0.828 |
| Stat5b | Jak2   | 0.828 |
| Sf3b2  | Jun    | 0.828 |
| Pparg  | Tet2   | 0.828 |
| Zfp110 | Gli3   | 0.828 |
| Ubb    | Rpsa   | 0.828 |
| Ubb    | Prkdc  | 0.828 |
| Tek    | Cdh1   | 0.828 |
| H1f0   | Cdk5r1 | 0.828 |
| Fancd2 | Lyn    | 0.828 |
| Fancd2 | Zfp277 | 0.828 |
| Thoc4  | Rbm3   | 0.828 |
| Dbnl   | Ctnn   | 0.828 |
| Map3k1 | Jun    | 0.828 |
| Cdc37  | Lrrk2  | 0.828 |



|          |            |       |
|----------|------------|-------|
| Snapc4   | Foxh1      | 0.828 |
| Hba-a1   | Rps13      | 0.828 |
| Hba-a1   | Hnrnpm     | 0.828 |
| Hsp90ab1 | Nphp1      | 0.828 |
| Suz12    | H2afx      | 0.828 |
| Hist3h2a | Usp7       | 0.828 |
| Tbl1x    | Nrip1      | 0.828 |
| Tbrg1    | Ngfr       | 0.828 |
| Casp8    | Flt3       | 0.828 |
| Rfwd2    | Fasn       | 0.827 |
| Mef2a    | Ppp2ca     | 0.827 |
| Map2k4   | Cd40       | 0.827 |
| Shc1     | Dok2       | 0.827 |
| Epc1     | Atf2       | 0.827 |
| Krt10    | Ahi1       | 0.827 |
| Gbbp1    | Mitf       | 0.827 |
| Dok1     | Nck2       | 0.827 |
| Cd40     | Traf3      | 0.827 |
| Dcx      | Dclk1      | 0.827 |
| Rnh1     | Hba-a1     | 0.827 |
| Cd2ap    | Ccnb1      | 0.827 |
| Zbtb7c   | Hdac3      | 0.827 |
| Psmb5    | Myh3       | 0.827 |
| Psmb4    | Stam2      | 0.827 |
| Psmb1    | Calm2      | 0.827 |
| Tcerg1   | Hnrnpab    | 0.827 |
| Tcerg1   | 2500003M1C | 0.827 |
| Usp2     | Uimc1      | 0.827 |
| Sod1     | Ar         | 0.827 |
| Sod1     | Gria2      | 0.827 |
| Sod1     | Gli3       | 0.827 |
| Ssbp3    | Lhx9       | 0.827 |
| Pura     | Actr1a     | 0.827 |
| Pura     | Ppp2ca     | 0.827 |
| Ahi1     | Rps27a     | 0.827 |
| Tle1     | Zfp521     | 0.827 |
| Ldb2     | Lmx1a      | 0.827 |
| Lmx1b    | Zfp446     | 0.827 |
| Hnf1a    | Brpf1      | 0.827 |
| Hnf1a    | Foxh1      | 0.827 |
| Tcf12    | Cops5      | 0.827 |
| Naglu    | Aco1       | 0.827 |
| Naglu    | Ccr9       | 0.827 |
| Max      | Tpi1       | 0.827 |
| Mapt     | Dusp1      | 0.827 |
| Hspa8    | Myd88      | 0.827 |

|          |         |       |
|----------|---------|-------|
| Ncoa1    | Nrip1   | 0.827 |
| Nr6a1    | Dnmt3b  | 0.827 |
| Tle4     | Msx1    | 0.827 |
| Mixl1    | Tardbp  | 0.827 |
| Stat3    | Tmf1    | 0.827 |
| Magi2    | Vdr     | 0.827 |
| Cenpv    | Mog     | 0.827 |
| Ube2n    | Map3k1  | 0.827 |
| Stat5a   | Agap2   | 0.827 |
| Eya1     | Neurod1 | 0.827 |
| Pparg    | Lhb     | 0.827 |
| Ppargc1a | Hoxb1   | 0.827 |
| Trip4    | Med16   | 0.827 |
| Zfp110   | Flt1    | 0.827 |
| Syn2     | Ppp1cc  | 0.827 |
| Grin2a   | Notch4  | 0.827 |
| Hba-a1   | Eif3e   | 0.827 |
| Cc2d2a   | Tuba1b  | 0.827 |
| Suz12    | Uqcrc1  | 0.827 |
| Rps13    | Cycs    | 0.827 |
| VeZF1    | Hoxa2   | 0.827 |
| Bag1     | Tcf4    | 0.826 |
| Bag1     | Hoxa9   | 0.826 |
| B2m      | Ntrk1   | 0.826 |
| Mecp2    | Polr3f  | 0.826 |
| Mecp2    | Tet2    | 0.826 |
| Psm4     | Calm2   | 0.826 |
| Epha2    | Dsg1a   | 0.826 |
| Epha2    | Prss1   | 0.826 |
| Epc1     | Rarb    | 0.826 |
| Cd40     | Ikbkg   | 0.826 |
| Rnh1     | Calm2   | 0.826 |
| Sin3b    | Etv6    | 0.826 |
| Cry1     | Ezh2    | 0.826 |
| Id3      | Anxa2   | 0.826 |
| Psm5     | Actn1   | 0.826 |
| Pdia2    | Hsp90b1 | 0.826 |
| Usp2     | Grb10   | 0.826 |
| Usp2     | Ccar1   | 0.826 |
| Usp2     | Nos2    | 0.826 |
| Usp2     | Foxo3   | 0.826 |
| Sod1     | Krt2    | 0.826 |
| Sod1     | Cops4   | 0.826 |
| Sod1     | Prdm16  | 0.826 |
| Pura     | Ppp1cb  | 0.826 |
| Rai14    | Srebf1  | 0.826 |

|         |          |       |
|---------|----------|-------|
| Tle1    | Fos      | 0.826 |
| Hnf1a   | Tle6     | 0.826 |
| Naglu   | Glt1d1   | 0.826 |
| Nr1i2   | Tial1    | 0.826 |
| Sox2    | Pdx1     | 0.826 |
| Etv6    | Sfpi1    | 0.826 |
| Egr2    | Tsg101   | 0.826 |
| Prkcd   | Ntrk1    | 0.826 |
| Bhlhe41 | Neurog2  | 0.826 |
| Bhlhe41 | Ubb      | 0.826 |
| Cenpv   | Scmh1    | 0.826 |
| Hbb-b1  | Gnb2l1   | 0.826 |
| Hbb-b1  | Pdia6    | 0.826 |
| Aldoa   | Cfl1     | 0.826 |
| Akr1b3  | Fbxo6    | 0.826 |
| Snca    | Snap25   | 0.826 |
| Trip4   | Kat2b    | 0.826 |
| Zfp110  | Tbk1     | 0.826 |
| Fancd2  | Uchl1    | 0.826 |
| Pbx2    | Meis1    | 0.826 |
| Smad2   | Myod1    | 0.826 |
| Hba-a1  | Eprs     | 0.826 |
| Setx    | Jarid2   | 0.826 |
| Med16   | Nkd2     | 0.826 |
| Gtf3c1  | Phf2     | 0.826 |
| Nup62   | Nxt1     | 0.826 |
| Gmnn    | Spata24  | 0.826 |
| Casp8   | Mdm4     | 0.826 |
| Vezf1   | Strap    | 0.826 |
| Topbp1  | Ints3    | 0.826 |
| Zfp263  | Zfp473   | 0.825 |
| Bag1    | Bag4     | 0.825 |
| Mapkbp1 | Mapk8ip3 | 0.825 |
| Mecp2   | Cebpb    | 0.825 |
| Ttc7b   | Efr3b    | 0.825 |
| Psm4    | Krt2     | 0.825 |
| Sorbs1  | Map1lc3b | 0.825 |
| Sorbs1  | Insr     | 0.825 |
| Pik3r1  | Irs2     | 0.825 |
| Cyfip2  | Abl2     | 0.825 |
| Epha2   | Yeats2   | 0.825 |
| Gpbp1   | Nfya     | 0.825 |
| Cited4  | Pcbd1    | 0.825 |
| Cited4  | Trim35   | 0.825 |
| Meis3   | Jdp2     | 0.825 |
| Rnh1    | Shank3   | 0.825 |

|         |          |       |
|---------|----------|-------|
| Rnh1    | Ndufa4   | 0.825 |
| Rnh1    | Hist1h4a | 0.825 |
| Rnh1    | Mtap1a   | 0.825 |
| Rnh1    | Nphp1    | 0.825 |
| Bcl11b  | Atr      | 0.825 |
| Actbl2  | Dsp      | 0.825 |
| Id2     | Cdk1     | 0.825 |
| Id2     | Med16    | 0.825 |
| Homer1  | Grid2    | 0.825 |
| Psmb5   | Notch1   | 0.825 |
| Psmb5   | Atxn3    | 0.825 |
| Psmb4   | Phf20    | 0.825 |
| Psmb4   | Tnk2     | 0.825 |
| Psmb4   | Skil     | 0.825 |
| Rac1    | Nf1      | 0.825 |
| Rac1    | Ctnnb1   | 0.825 |
| Usp2    | Mapt     | 0.825 |
| Usp2    | Camk1    | 0.825 |
| Usp2    | Mcl1     | 0.825 |
| Eif3b   | Ldb3     | 0.825 |
| Eif3b   | Gm5414   | 0.825 |
| Eif3b   | Hnrnpa1  | 0.825 |
| Sod1    | Nr3c2    | 0.825 |
| Sod1    | Pklr     | 0.825 |
| Sod1    | Was      | 0.825 |
| Crk     | Ywhah    | 0.825 |
| Apba1   | Lin7c    | 0.825 |
| Pcgf2   | Cbx7     | 0.825 |
| Traf6   | Ntrk1    | 0.825 |
| Traf6   | Stub1    | 0.825 |
| Hist2h4 | Ascl1    | 0.825 |
| Ldb2    | Tal2     | 0.825 |
| Naglu   | Actn1    | 0.825 |
| Dusp1   | Ppp2cb   | 0.825 |
| Birc3   | Flt3     | 0.825 |
| Prkce   | Rps6ka3  | 0.825 |
| Bhlhe41 | Hist3h2a | 0.825 |
| Hbb-b1  | Rps13    | 0.825 |
| Cyld    | Dlg1     | 0.825 |
| Akr1b3  | Krt73    | 0.825 |
| Sf3b2   | Zmym2    | 0.825 |
| Pparg   | Pdgfrb   | 0.825 |
| Ncoa6   | Mll2     | 0.825 |
| Trip4   | Zfp764   | 0.825 |
| Ubb     | Nefm     | 0.825 |
| H1f0    | Ccna1    | 0.825 |

|           |         |       |
|-----------|---------|-------|
| Fancd2    | Gtf2f1  | 0.825 |
| Fancd2    | Csf1r   | 0.825 |
| Dynll1    | Tuba1a  | 0.825 |
| Map3k5    | Tax1bp1 | 0.825 |
| Cdk1      | Ccna1   | 0.825 |
| Rps13     | Psmc5   | 0.825 |
| Hist3h2a  | Olig2   | 0.825 |
| Ubqln2    | Eef2    | 0.825 |
| Ptma      | Ube2g2  | 0.825 |
| Gab1      | Tuba4a  | 0.825 |
| Topbp1    | Nol12   | 0.825 |
| Topbp1    | Cytsb   | 0.825 |
| Bag1      | Hadha   | 0.824 |
| Bag1      | Grin1   | 0.824 |
| Map2k3    | Map2k6  | 0.824 |
| Mecp2     | Ubtf    | 0.824 |
| Shc1      | Sla     | 0.824 |
| Sorbs1    | Lyn     | 0.824 |
| Sorbs1    | Flt1    | 0.824 |
| Als2      | Sqstm1  | 0.824 |
| Krt10     | Anxa1   | 0.824 |
| Gpbp1     | Taf6    | 0.824 |
| Smad9     | Psmc3   | 0.824 |
| Dok1      | Nck1    | 0.824 |
| Cul1      | Myog    | 0.824 |
| Rnh1      | Eif4a2  | 0.824 |
| Rnh1      | Nap1l4  | 0.824 |
| Rnh1      | Ccar1   | 0.824 |
| Rnh1      | Aifm1   | 0.824 |
| Rnh1      | Myl12b  | 0.824 |
| Rnh1      | Vdac2   | 0.824 |
| Bcl11b    | Cd2ap   | 0.824 |
| Bcl11b    | Tcf12   | 0.824 |
| Bcl11b    | Rps6ka3 | 0.824 |
| Bcl11b    | Psmc2   | 0.824 |
| Myl9      | Pex19   | 0.824 |
| Actbl2    | Mph1    | 0.824 |
| Id3       | Hnf1a   | 0.824 |
| Cd2ap     | Hck     | 0.824 |
| Psb5      | Traf3   | 0.824 |
| Psb5      | Ntrk2   | 0.824 |
| Psb5      | Mycn    | 0.824 |
| Psb5      | Sh3gl2  | 0.824 |
| Psb4      | Ripk1   | 0.824 |
| Psb1      | Mms19   | 0.824 |
| LOC677235 | Ybx1    | 0.824 |

|          |         |       |
|----------|---------|-------|
| Usp2     | Psma7   | 0.824 |
| Usp2     | Tab3    | 0.824 |
| Eif3b    | Eprs    | 0.824 |
| Eif3b    | Asap2   | 0.824 |
| Sfrs2    | Fus     | 0.824 |
| Crkl     | Cblb    | 0.824 |
| Rab3d    | Usp9x   | 0.824 |
| Pura     | Psma1   | 0.824 |
| Pura     | Cdk1    | 0.824 |
| Rai14    | Pdcd6   | 0.824 |
| Rai14    | Neurog2 | 0.824 |
| Pbx3     | Hoxa6   | 0.824 |
| Efs      | Cav3    | 0.824 |
| Egr1     | Irak1   | 0.824 |
| Mixl1    | Hoxd12  | 0.824 |
| Prkce    | Mcl1    | 0.824 |
| Bhlhe41  | Ddx5    | 0.824 |
| Cenpv    | Csnk2b  | 0.824 |
| Ube2i    | Sfn     | 0.824 |
| Ube2i    | Daxx    | 0.824 |
| Ube2e3   | Ube2g2  | 0.824 |
| Cyld     | Nfkbia  | 0.824 |
| Cyld     | Ulk1    | 0.824 |
| Akr1b3   | Anxa1   | 0.824 |
| Akr1b3   | Ubqln2  | 0.824 |
| Pparg    | Bat1a   | 0.824 |
| Ppargc1a | Jun     | 0.824 |
| Trip4    | Ddx5    | 0.824 |
| Kdm4c    | Lass2   | 0.824 |
| Ubb      | Prdx1   | 0.824 |
| Ubb      | Tsc22d3 | 0.824 |
| Klf10    | Smad5   | 0.824 |
| Ddx5     | Smad2   | 0.824 |
| Dynll1   | Pcbp1   | 0.824 |
| Map3k5   | Rnf11   | 0.824 |
| Eif4a1   | Atp5d   | 0.824 |
| Hba-a1   | Cycs    | 0.824 |
| Hba-a1   | Hnrnpa1 | 0.824 |
| Lrp1     | Dlg4    | 0.824 |
| Suz12    | Pcna    | 0.824 |
| Suz12    | Psme3   | 0.824 |
| Suz12    | Vav1    | 0.824 |
| Rps13    | Tceb2   | 0.824 |
| Rpl7     | Rps3    | 0.824 |
| Topbp1   | Tuba1c  | 0.824 |
| Bat1a    | Prkcsh  | 0.824 |

|        |         |       |
|--------|---------|-------|
| Msx2   | Runx2   | 0.824 |
| Socs3  | Tceb1   | 0.823 |
| Dvl2   | Pklr    | 0.823 |
| Bag1   | Smad3   | 0.823 |
| Mecp2  | Rb1     | 0.823 |
| Psma4  | Hsph1   | 0.823 |
| Psma4  | Krt73   | 0.823 |
| Psma4  | Pcbp1   | 0.823 |
| Krt10  | Flnc    | 0.823 |
| Krt10  | Atp5a1  | 0.823 |
| Cd40   | Ube2n   | 0.823 |
| Bcl11b | Pkm2    | 0.823 |
| Id2    | Pdlim4  | 0.823 |
| Id3    | Try10   | 0.823 |
| Id3    | Ccar1   | 0.823 |
| Irf8   | Fos     | 0.823 |
| Id1    | Smad4   | 0.823 |
| Cd2ap  | Nde1    | 0.823 |
| Psbm5  | Krt76   | 0.823 |
| Psbm5  | Ppp2cb  | 0.823 |
| Psbm5  | Sfn     | 0.823 |
| Psbm4  | Actn1   | 0.823 |
| Psm7   | Psm14   | 0.823 |
| Invs   | Myh9    | 0.823 |
| Usp2   | Mll1    | 0.823 |
| Usp2   | Ctnnb1  | 0.823 |
| Usp2   | Atxn3   | 0.823 |
| Eif3b  | Syncrin | 0.823 |
| Eif3b  | Ube2v1  | 0.823 |
| Eif3b  | Ubqln2  | 0.823 |
| Sod1   | Krt15   | 0.823 |
| Lmn1   | Ik      | 0.823 |
| Iqcb1  | Rps27a  | 0.823 |
| Crkl   | Rapgef1 | 0.823 |
| Traf6  | Htt     | 0.823 |
| Traf6  | Jun     | 0.823 |
| Rab7   | Bat1a   | 0.823 |
| Rab3d  | Aldoa   | 0.823 |
| Pura   | Ywhag   | 0.823 |
| Tle1   | E2f1    | 0.823 |
| Ldb2   | Lhx2    | 0.823 |
| Naglu  | Abca8a  | 0.823 |
| Pdia3  | Tubb4   | 0.823 |
| Sox2   | Msx2    | 0.823 |
| Mapt   | Vcp     | 0.823 |
| Egr2   | Sncg    | 0.823 |

|          |            |       |
|----------|------------|-------|
| Bcl10    | Irak1      | 0.823 |
| Tmf1     | Stat5a     | 0.823 |
| Tmf1     | Ski        | 0.823 |
| Eya3     | Smad4      | 0.823 |
| Neurl2   | Cryge      | 0.823 |
| Nbr1     | Itga5      | 0.823 |
| Ncam1    | E130012A19 | 0.823 |
| Prkca    | Lepr       | 0.823 |
| Cenpv    | Ptrf       | 0.823 |
| Ube2n    | Tax1bp1    | 0.823 |
| Hbb-b1   | Psmc2      | 0.823 |
| Kdm4c    | Hes6       | 0.823 |
| Zfp110   | Junb       | 0.823 |
| Phc3     | Hist3h2a   | 0.823 |
| Irak1    | Peli2      | 0.823 |
| Smarcae1 | Brca1      | 0.823 |
| Syn2     | Hsp90ab1   | 0.823 |
| Smad2    | Mdm4       | 0.823 |
| Dll4     | Dll1       | 0.823 |
| Rps13    | Ube2v2     | 0.823 |
| Hoxd10   | Olig1      | 0.823 |
| Ccna2    | Cdkn1b     | 0.823 |
| Zfp277   | Phf17      | 0.823 |
| Itpr3    | Flot1      | 0.823 |
| Mef2c    | Gli2       | 0.823 |
| Casp8    | Cttn       | 0.823 |
| Topbp1   | Ap3s1      | 0.823 |
| Map2k4   | Mapk8      | 0.822 |
| Mecp2    | Per1       | 0.822 |
| Npm1     | Trp53      | 0.822 |
| Epha2    | Anxa1      | 0.822 |
| Epc1     | Bcl11b     | 0.822 |
| Gpbp1    | Lyn        | 0.822 |
| Cited4   | Sfpi1      | 0.822 |
| Rnh1     | Thrap3     | 0.822 |
| Bcl11b   | Kat2a      | 0.822 |
| Bcl11b   | Tle6       | 0.822 |
| Bcl11b   | Hif1a      | 0.822 |
| Myl9     | Itgb5      | 0.822 |
| Cry2     | Arntl      | 0.822 |
| Id3      | Naca       | 0.822 |
| Id1      | Ar         | 0.822 |
| Cd2ap    | Vcp        | 0.822 |
| Psmb5    | Arntl      | 0.822 |
| Psmb4    | Tuba1b     | 0.822 |
| Fbxl2    | Tcp1       | 0.822 |



|          |        |       |
|----------|--------|-------|
| Usp2     | Arntl  | 0.822 |
| Usp2     | Vdac1  | 0.822 |
| Usp2     | Rnf14  | 0.822 |
| Pcbd1    | Hnf1b  | 0.822 |
| Eif3b    | Pkp1   | 0.822 |
| Sod1     | Pik3ca | 0.822 |
| Sod1     | Anxa2  | 0.822 |
| Lmnb1    | Rbm10  | 0.822 |
| Taf3     | Hmga1  | 0.822 |
| Gata3    | Ppara  | 0.822 |
| Mxi1     | Smad5  | 0.822 |
| Abl1     | Dok3   | 0.822 |
| Rab5b    | Cdc37  | 0.822 |
| Rab6     | Rab27a | 0.822 |
| Rab3d    | Cdh13  | 0.822 |
| Pura     | G3bp1  | 0.822 |
| Pura     | Rbm3   | 0.822 |
| Ldb1     | Ciita  | 0.822 |
| Skp1a    | Fbxw7  | 0.822 |
| Pias3    | Sp3    | 0.822 |
| ErbB2    | Egfr   | 0.822 |
| Ccne1    | H1     | 0.822 |
| Sox2     | Ifrd1  | 0.822 |
| Sox2     | Cdh1   | 0.822 |
| Zfp236   | Nr0b2  | 0.822 |
| Dnajb6   | Map2k7 | 0.822 |
| Egr2     | Cyld   | 0.822 |
| Mixl1    | Hoxa9  | 0.822 |
| Nfkbiz   | Nfkb1  | 0.822 |
| Magi2    | Snai1  | 0.822 |
| Nbr1     | Cebpa  | 0.822 |
| Aph1b    | Mbp    | 0.822 |
| Cyld     | Zfp110 | 0.822 |
| Aldoa    | Hspb1  | 0.822 |
| Aldoa    | Dnajb1 | 0.822 |
| Aldoa    | Hnrnpm | 0.822 |
| Stat5a   | Jak2   | 0.822 |
| Efna1    | Sbds   | 0.822 |
| Zfp473   | Foxp1  | 0.822 |
| Pparg    | Cblb   | 0.822 |
| Ppargc1a | Hdac3  | 0.822 |
| Kdm4c    | Jun    | 0.822 |
| Ubb      | Hspa9  | 0.822 |
| Ubb      | Tuba4a | 0.822 |
| Fancd2   | Nfatc1 | 0.822 |
| Syn2     | Cbl    | 0.822 |

|         |          |       |
|---------|----------|-------|
| Syn2    | Hspa1b   | 0.822 |
| Was     | Dlg1     | 0.822 |
| Map3k5  | Mapk8ip2 | 0.822 |
| Med16   | Trp73    | 0.822 |
| Rps13   | Eno3     | 0.822 |
| Rps13   | Myl12b   | 0.822 |
| Zfp277  | Hoxb4    | 0.822 |
| Ltbr    | Tax1bp1  | 0.822 |
| Topbp1  | Utp15    | 0.822 |
| Fasn    | Elf1     | 0.822 |
| Map2k4  | Tlr4     | 0.821 |
| Gtf2a1l | Sox8     | 0.821 |
| Shc3    | Dlg2     | 0.821 |
| Psm4    | Tuba1b   | 0.821 |
| Sorbs1  | Irs1     | 0.821 |
| Sorbs1  | Cav3     | 0.821 |
| Gppp1   | Sfpi1    | 0.821 |
| Gppp1   | Msx1     | 0.821 |
| Cited4  | Aebp2    | 0.821 |
| Cul1    | Fbxl20   | 0.821 |
| Myl9    | Ttc4     | 0.821 |
| Gtf2a1  | Hnf1a    | 0.821 |
| Irf8    | Cebpa    | 0.821 |
| Id1     | Ascl3    | 0.821 |
| Cd2ap   | Sla      | 0.821 |
| Ssbp2   | Lmx1a    | 0.821 |
| Psmb5   | Krt73    | 0.821 |
| Psmb4   | ErbB2    | 0.821 |
| Psmb1   | Rcn2     | 0.821 |
| Psmb1   | Pcbp1    | 0.821 |
| Invs    | Tubb5    | 0.821 |
| Usp2    | NlrX1    | 0.821 |
| Usp2    | Csnk1d   | 0.821 |
| Usp2    | Usp8     | 0.821 |
| Usp2    | Casp3    | 0.821 |
| Usp2    | Cebpa    | 0.821 |
| Eif3b   | Rps4x    | 0.821 |
| Eif3b   | Cycs     | 0.821 |
| Sod1    | Pten     | 0.821 |
| Sod1    | Mdm4     | 0.821 |
| Lmnb1   | Mtap     | 0.821 |
| Lmnb1   | Larp4b   | 0.821 |
| Cdk5    | Ccne1    | 0.821 |
| Traf6   | Lrrk2    | 0.821 |
| Zfp369  | Ntrk1    | 0.821 |
| Hist2h4 | Rpsa     | 0.821 |

|         |          |       |
|---------|----------|-------|
| Rai14   | Zfp592   | 0.821 |
| Tle1    | Eed      | 0.821 |
| Ldb2    | Lmo1     | 0.821 |
| Pias3   | Msx1     | 0.821 |
| Sox2    | Pax3     | 0.821 |
| Sox2    | Hist4h4  | 0.821 |
| Birc2   | Map2k7   | 0.821 |
| Tmf1    | Nbr1     | 0.821 |
| Eya3    | Leo1     | 0.821 |
| Prkce   | Clybl    | 0.821 |
| Ptpnc   | Cdh17    | 0.821 |
| Rb1     | Ppp1cc   | 0.821 |
| Cyld    | Smad2    | 0.821 |
| Ankrd17 | Tfrc     | 0.821 |
| Aldoa   | Gnb2l1   | 0.821 |
| Tirap   | Cblb     | 0.821 |
| Snap25  | Vamp2    | 0.821 |
| Trip4   | Trim27   | 0.821 |
| Trip4   | Med20    | 0.821 |
| Phc3    | Sp3      | 0.821 |
| Dynll1  | Trim2    | 0.821 |
| Syn2    | Mark4    | 0.821 |
| Eif4a1  | Telo2    | 0.821 |
| Trim30  | Ulk1     | 0.821 |
| Hba-a1  | Gm5414   | 0.821 |
| Sufu    | Sap18    | 0.821 |
| Ifrd1   | Sp1      | 0.821 |
| Mapk7   | Slc34a1  | 0.821 |
| Mapk7   | Ryk      | 0.821 |
| Lef1    | Smarcd3  | 0.821 |
| Topbp1  | Rbm5     | 0.821 |
| Foxh1   | Dlx5     | 0.821 |
| Socs3   | Tceb2    | 0.82  |
| Bag1    | Atp6v0d2 | 0.82  |
| Bag1    | Cops5    | 0.82  |
| Mapkbp1 | Cd40     | 0.82  |
| Map2k4  | Myd88    | 0.82  |
| Mecp2   | Sin3b    | 0.82  |
| Mecp2   | Gata4    | 0.82  |
| Tnfaip3 | Ube2d3   | 0.82  |
| Pma4    | Dynll1   | 0.82  |
| Shc1    | Dab1     | 0.82  |
| Als2    | Klhl17   | 0.82  |
| Mark2   | Ywhah    | 0.82  |
| Gpbp1   | Gtf2a1   | 0.82  |
| Rad51   | Bclaf1   | 0.82  |

|           |         |      |
|-----------|---------|------|
| Cited4    | Mtf2    | 0.82 |
| Meis3     | Pbx4    | 0.82 |
| Rnh1      | Atp5b   | 0.82 |
| Rnh1      | Pkm2    | 0.82 |
| Bcl11b    | Kat5    | 0.82 |
| Bcl11b    | Gata4   | 0.82 |
| Myl9      | Tbrg1   | 0.82 |
| Id2       | Foxp1   | 0.82 |
| Id2       | Zfp292  | 0.82 |
| Id2       | Cebpa   | 0.82 |
| Id2       | Runx2   | 0.82 |
| Id3       | Krt16   | 0.82 |
| Id3       | Tubb6   | 0.82 |
| Id1       | Ep300   | 0.82 |
| Psmb4     | Nr1h3   | 0.82 |
| Tcerg1    | Gli2    | 0.82 |
| LOC677235 | Exoc4   | 0.82 |
| Usp2      | Msx2    | 0.82 |
| Usp2      | Rer1    | 0.82 |
| Eif3b     | Nrip2   | 0.82 |
| Eif3b     | Rpsa    | 0.82 |
| Lmnb1     | Nup88   | 0.82 |
| Lmnb1     | Cbx5    | 0.82 |
| Lmnb1     | Trim28  | 0.82 |
| Hand1     | Sox15   | 0.82 |
| Traf2     | Map3k5  | 0.82 |
| Traf6     | Igf1r   | 0.82 |
| Traf6     | Ski     | 0.82 |
| Rab5b     | Mbp     | 0.82 |
| Pura      | Usp8    | 0.82 |
| Pura      | Casp3   | 0.82 |
| Pclo      | Rims2   | 0.82 |
| Sos1      | Spry1   | 0.82 |
| Zfp354a   | Myb     | 0.82 |
| Pias3     | Polr2a  | 0.82 |
| Sox2      | Smarca4 | 0.82 |
| Ndel1     | Myo5a   | 0.82 |
| Egr2      | Ube4b   | 0.82 |
| Xiap      | Map3k2  | 0.82 |
| Stat3     | Irak1   | 0.82 |
| Tmf1      | Mc4r    | 0.82 |
| Nbr1      | Eif2c2  | 0.82 |
| Nbr1      | Prkcsh  | 0.82 |
| Hbb-b1    | Cycs    | 0.82 |
| Aldoa     | Hnrnpf  | 0.82 |
| Aldoa     | Ptrf    | 0.82 |

|          |         |       |
|----------|---------|-------|
| Aldoa    | Fbln2   | 0.82  |
| Aldoa    | Hnrnpk  | 0.82  |
| Sf3b2    | Zfp128  | 0.82  |
| Pparg    | Nr5a1   | 0.82  |
| Pparg    | Insr    | 0.82  |
| Ppargc1a | Tgfb1i1 | 0.82  |
| Kdm4c    | Lhx9    | 0.82  |
| Zfp110   | Msx2    | 0.82  |
| Zfp110   | Uimc1   | 0.82  |
| H1f0     | Foxp1   | 0.82  |
| Fancd2   | Ube4b   | 0.82  |
| Thoc4    | Ccnb1   | 0.82  |
| Itpr1    | Grid2   | 0.82  |
| Smad2    | Ndfip1  | 0.82  |
| Smad2    | Hoxa10  | 0.82  |
| Fkbp14   | Rpsa    | 0.82  |
| Hba-a1   | Rpl7    | 0.82  |
| Suz12    | Gtf2b   | 0.82  |
| Suz12    | Ldhd    | 0.82  |
| Rps13    | Pcbp1   | 0.82  |
| Rps13    | Ap2m1   | 0.82  |
| Ubqln2   | Hnrnpk  | 0.82  |
| Lrrk2    | Ctnnb1  | 0.82  |
| Gmnn     | Taf1c   | 0.82  |
| Fbxw7    | Pin1    | 0.82  |
| Bag1     | Sirt1   | 0.819 |
| B2m      | Stam2   | 0.819 |
| Map2k6   | Vav1    | 0.819 |
| Mecp2    | Sirt1   | 0.819 |
| Mecp2    | Gfi1b   | 0.819 |
| Mecp2    | Jun     | 0.819 |
| Btrc     | Reg1    | 0.819 |
| Psm4     | Ubxn2b  | 0.819 |
| Shc1     | Shank3  | 0.819 |
| Shc1     | Jak2    | 0.819 |
| Als2     | Arc     | 0.819 |
| Rarg     | Cebpa   | 0.819 |
| Gpbp1    | Sp3     | 0.819 |
| Irf9     | Hoxb8   | 0.819 |
| Stk38    | Ezh1    | 0.819 |
| Synj1    | Park2   | 0.819 |
| Lancl2   | Slc25a5 | 0.819 |
| Rnh1     | Pkp1    | 0.819 |
| Bcl11b   | Cdk6    | 0.819 |
| Bcl11b   | Gata3   | 0.819 |
| Bcl11b   | Ssbp3   | 0.819 |

|           |          |       |
|-----------|----------|-------|
| Bcl11b    | Cebpa    | 0.819 |
| Sgk1      | Scn8a    | 0.819 |
| Sgk1      | Scnn1a   | 0.819 |
| Sin3a     | Phf12    | 0.819 |
| Id2       | Phf2     | 0.819 |
| Id3       | Brca1    | 0.819 |
| Cd2ap     | Herpud1  | 0.819 |
| Cd2ap     | Gtf3c1   | 0.819 |
| Homer1    | Grm5     | 0.819 |
| Psmb5     | Mcl1     | 0.819 |
| LOC677235 | Inpp5e   | 0.819 |
| Eif3b     | Akr1b3   | 0.819 |
| Eif3b     | Ckm      | 0.819 |
| Eif3b     | Eif4b    | 0.819 |
| Psen1     | Notch3   | 0.819 |
| Kit       | Jak2     | 0.819 |
| Traf3     | Tlr4     | 0.819 |
| Rab5b     | Arhgef7  | 0.819 |
| Pura      | Skp2     | 0.819 |
| Ripk1     | Tax1bp1  | 0.819 |
| Nkx3-2    | Ikbkb    | 0.819 |
| Hnf1a     | Ncor2    | 0.819 |
| Hist1h1a  | Ccne1    | 0.819 |
| Utrn      | Sgcd     | 0.819 |
| Esr1      | Map1lc3b | 0.819 |
| Mtf2      | Med16    | 0.819 |
| Xiap      | Pten     | 0.819 |
| Nbr1      | Ccar1    | 0.819 |
| Tab2      | Tmem115  | 0.819 |
| Ube2i     | Zfp277   | 0.819 |
| Pax3      | Lef1     | 0.819 |
| Sf3b2     | Mecom    | 0.819 |
| Ubb       | Pbx4     | 0.819 |
| Ubb       | Prpf31   | 0.819 |
| Tek       | Gab2     | 0.819 |
| Fancd2    | Itpr1    | 0.819 |
| Snapc4    | Olig1    | 0.819 |
| Snapc4    | Rorc     | 0.819 |
| Gtf3c1    | Suz12    | 0.819 |
| Angptl2   | Fez1     | 0.819 |
| Slc25a4   | Pdia6    | 0.819 |
| Rps13     | Rpl7     | 0.819 |
| Ubqln2    | Myh1     | 0.819 |
| Lmo3      | Tal1     | 0.819 |
| Cdk2      | Cdkn1a   | 0.819 |
| Nrip1     | Lass2    | 0.819 |

|           |          |       |
|-----------|----------|-------|
| Topbp1    | Cdc5l    | 0.819 |
| Topbp1    | Fam98a   | 0.819 |
| Fbxw8     | Cul1     | 0.818 |
| Dvl2      | Smurf1   | 0.818 |
| Bag1      | Pxn      | 0.818 |
| Bag1      | Tollip   | 0.818 |
| Mef2a     | Pbx1     | 0.818 |
| Mef2a     | Runx2    | 0.818 |
| Map2k4    | Map2k7   | 0.818 |
| Mecp2     | Tcf21    | 0.818 |
| Mecp2     | Pax3     | 0.818 |
| Gtf2a1l   | Zfp292   | 0.818 |
| Shcbp1    | Mov10    | 0.818 |
| Shc1      | Crkl     | 0.818 |
| Shc1      | Sh3bp2   | 0.818 |
| Als2      | Dlg4     | 0.818 |
| Flna      | Myh9     | 0.818 |
| Flna      | Krt2     | 0.818 |
| Cited4    | Ets2     | 0.818 |
| Phc1      | Mapkapk2 | 0.818 |
| Rnh1      | Eif4b    | 0.818 |
| Bcl11b    | H1f0     | 0.818 |
| Sgk1      | Scn10a   | 0.818 |
| Sgca      | Nos1     | 0.818 |
| Actbl2    | Myh3     | 0.818 |
| Id2       | Tsc22d3  | 0.818 |
| Id3       | Ncl      | 0.818 |
| Id1       | Cdkn1b   | 0.818 |
| Cd2ap     | Psmc7    | 0.818 |
| Raf1      | Gab1     | 0.818 |
| Psmc5     | Ptk2     | 0.818 |
| Psmc5     | Smurf1   | 0.818 |
| Psmc5     | Hspb1    | 0.818 |
| Psmc4     | Casp8    | 0.818 |
| Psmc1     | Actn1    | 0.818 |
| Rac1      | Camk2b   | 0.818 |
| Usp2      | Stat3    | 0.818 |
| Usp2      | Bcr      | 0.818 |
| Usp2      | Cttn     | 0.818 |
| Hnrnpa2b1 | Cct2     | 0.818 |
| Eif3b     | Ptrf     | 0.818 |
| Eif3b     | Nr1h4    | 0.818 |
| Sod1      | Krt79    | 0.818 |
| Rab3d     | Ptrf     | 0.818 |
| Pura      | Rps16    | 0.818 |
| Pura      | Ewsr1    | 0.818 |

|         |         |       |
|---------|---------|-------|
| Ldb1    | Med16   | 0.818 |
| Hnf1a   | Kat2b   | 0.818 |
| Naglu   | Actn4   | 0.818 |
| Naglu   | Cdc7    | 0.818 |
| Psen2   | Sri     | 0.818 |
| Usp9x   | Gnao1   | 0.818 |
| Bcl6    | Rxrg    | 0.818 |
| Max     | Zfp111  | 0.818 |
| Sox2    | Reg1    | 0.818 |
| Sox2    | Phf12   | 0.818 |
| Mapt    | Erg     | 0.818 |
| Mtf2    | Rps27a  | 0.818 |
| Etv6    | Rrm1    | 0.818 |
| Zfp236  | Ssbp4   | 0.818 |
| Egr2    | Nfe2l2  | 0.818 |
| Mixl1   | Gtf2e2  | 0.818 |
| Nbr1    | Casp3   | 0.818 |
| Nbr1    | Tardbp  | 0.818 |
| Ncam1   | Hspa5   | 0.818 |
| Hbb-b1  | Rpl22   | 0.818 |
| Aldoa   | Nr0b2   | 0.818 |
| Pax5    | Myb     | 0.818 |
| Ncoa6   | Morf4l1 | 0.818 |
| Zfp110  | Rer1    | 0.818 |
| Zfpm1   | Rbl2    | 0.818 |
| Irak1   | Il1rap  | 0.818 |
| Grin2a  | Kcnd2   | 0.818 |
| Smad2   | Flt3    | 0.818 |
| Suz12   | Vdac1   | 0.818 |
| Rps13   | Asap2   | 0.818 |
| Rps13   | Hnrnpa1 | 0.818 |
| Rpl7    | Pdlim7  | 0.818 |
| Tbrg1   | Rpl9    | 0.818 |
| Tbp     | Taf1c   | 0.818 |
| Casp8   | Hras1   | 0.818 |
| Casp8   | Cebpb   | 0.818 |
| Topbp1  | Aplf    | 0.818 |
| Topbp1  | Zfml    | 0.818 |
| Bag1    | Cenpv   | 0.817 |
| Bag1    | Uqcrc1  | 0.817 |
| Mecp2   | Bsx     | 0.817 |
| Mecp2   | Dzip3   | 0.817 |
| Mecp2   | Ankra2  | 0.817 |
| Gtf2a1l | Phf17   | 0.817 |
| Psm4    | Rnh1    | 0.817 |
| Shc1    | Spag9   | 0.817 |



|        |          |       |
|--------|----------|-------|
| Shc1   | Cd300a   | 0.817 |
| Shc1   | Skp2     | 0.817 |
| Epha2  | Flnc     | 0.817 |
| Rarg   | Tle6     | 0.817 |
| Rad51  | Fasn     | 0.817 |
| Cited4 | Hoxb1    | 0.817 |
| Cd40   | Mapk8    | 0.817 |
| Rnh1   | Psmb1    | 0.817 |
| Rnh1   | Fbxo6    | 0.817 |
| Rnh1   | Clta     | 0.817 |
| Actbl2 | Rplp0    | 0.817 |
| Id2    | Zfp277   | 0.817 |
| Irf8   | Fas      | 0.817 |
| Cd2ap  | Map1lc3b | 0.817 |
| Psmb5  | Ctcf     | 0.817 |
| Psmb4  | Keap1    | 0.817 |
| Psmb4  | Sykb     | 0.817 |
| Tcerg1 | Nid2     | 0.817 |
| Tcerg1 | Ctnnb1   | 0.817 |
| Usp2   | Hdac6    | 0.817 |
| Usp2   | Gli3     | 0.817 |
| Usp2   | Epas1    | 0.817 |
| Eif3b  | Mdh2     | 0.817 |
| Sod1   | Ptk2     | 0.817 |
| Sod1   | Hspa8    | 0.817 |
| Ahi1   | Krt2     | 0.817 |
| Ripk1  | Cyld     | 0.817 |
| Rai14  | Phf17    | 0.817 |
| Sox2   | Slc1a2   | 0.817 |
| Sox2   | Ulk1     | 0.817 |
| Mapt   | Ilk      | 0.817 |
| Mapt   | Stat3    | 0.817 |
| Dnajb6 | Rps6ka3  | 0.817 |
| Rnf19a | Sufu     | 0.817 |
| Egr2   | Xiap     | 0.817 |
| Mixl1  | Dlx5     | 0.817 |
| Mixl1  | Dmrtc2   | 0.817 |
| Cops8  | Gsk3b    | 0.817 |
| Nbr1   | Map3k2   | 0.817 |
| Nbr1   | Rer1     | 0.817 |
| Prkcb  | Neurod1  | 0.817 |
| Prkce  | Diap1    | 0.817 |
| Cenpv  | Suz12    | 0.817 |
| Ube2i  | Phf2     | 0.817 |
| Hbb-b1 | Anxa1    | 0.817 |
| Hbb-b1 | Cops4    | 0.817 |

|           |         |       |
|-----------|---------|-------|
| Cyld      | Ndfip1  | 0.817 |
| Aldoa     | Tuba1a  | 0.817 |
| Akr1b3    | Tubb6   | 0.817 |
| Cbx1      | Trim28  | 0.817 |
| Sf3b2     | Hif1a   | 0.817 |
| Pparg     | Ripk2   | 0.817 |
| Rhoq      | Pxn     | 0.817 |
| Zfp110    | Slc1a2  | 0.817 |
| Capn2     | Dusp3   | 0.817 |
| Eif4a1    | Pdia6   | 0.817 |
| Eif4a1    | Eif3e   | 0.817 |
| Rbx1      | Sf3b1   | 0.817 |
| Itpr1     | Nploc4  | 0.817 |
| Gps1      | Uchl1   | 0.817 |
| Suz12     | Morc3   | 0.817 |
| Suz12     | Aebp2   | 0.817 |
| Hdac3     | Jun     | 0.817 |
| Sertad1   | Lass2   | 0.817 |
| Zfp277    | Gtf2h2  | 0.817 |
| Zfp277    | Dlx5    | 0.817 |
| Cul5      | Socs2   | 0.817 |
| Lef1      | Cdh1    | 0.817 |
| Map2k3    | Dusp2   | 0.816 |
| Tnfaip3   | Ripk1   | 0.816 |
| Psm4      | Krt15   | 0.816 |
| Shc1      | Tyk2    | 0.816 |
| Sorbs1    | Sla2    | 0.816 |
| Pik3r1    | Grb10   | 0.816 |
| Hist1h1e  | Cbx3    | 0.816 |
| Epha2     | Lin54   | 0.816 |
| Usf1      | Etv4    | 0.816 |
| Bcl11b    | Snap25  | 0.816 |
| Bcl11b    | Itpr1   | 0.816 |
| Bcl11b    | Cebpb   | 0.816 |
| MyI9      | Nucb1   | 0.816 |
| MyI9      | Hap1    | 0.816 |
| Tcf3      | Smarca4 | 0.816 |
| Per2      | Per3    | 0.816 |
| Id2       | Olig2   | 0.816 |
| Id3       | Actb    | 0.816 |
| Cd2ap     | Ptpn11  | 0.816 |
| Psm5      | Nr1h3   | 0.816 |
| Rac1      | Ctnn    | 0.816 |
| Smad6     | Runx2   | 0.816 |
| LOC677235 | Wdr37   | 0.816 |
| Usp2      | Sod1    | 0.816 |

|          |           |       |
|----------|-----------|-------|
| Usp2     | Scn8a     | 0.816 |
| Usp2     | Scnn1a    | 0.816 |
| Usp2     | Sirt1     | 0.816 |
| Usp2     | Gsc       | 0.816 |
| Usp2     | Ripk2     | 0.816 |
| Usp2     | Cdh1      | 0.816 |
| Eif3b    | Rpl7      | 0.816 |
| Sod1     | Ski       | 0.816 |
| Sod1     | Flt3      | 0.816 |
| Lmnb1    | Nup214    | 0.816 |
| Lmnb1    | Tor1aip1  | 0.816 |
| Lmnb1    | Top2a     | 0.816 |
| Nkx2-5   | Mef2c     | 0.816 |
| Itgb1bp2 | Hsp90aa1  | 0.816 |
| Traf6    | Ndn       | 0.816 |
| Traf6    | Grin1     | 0.816 |
| Rab5b    | Taok1     | 0.816 |
| Bub1     | Dapk1     | 0.816 |
| Pura     | Hist1h1a  | 0.816 |
| Pura     | Ina       | 0.816 |
| Ahi1     | Tubb5     | 0.816 |
| Bax      | Ppp1cc    | 0.816 |
| Naglu    | Hnrnpf    | 0.816 |
| Naglu    | Nisch     | 0.816 |
| Max      | Trim32    | 0.816 |
| Mapt     | Calr      | 0.816 |
| Mtf1     | Ssbp4     | 0.816 |
| Mtf2     | Aebp2     | 0.816 |
| Mtf2     | Hdac10    | 0.816 |
| Dnajb6   | Myocd     | 0.816 |
| Pou2f1   | Aes       | 0.816 |
| Flnc     | Hist1h2ai | 0.816 |
| Birc3    | Mapk8ip1  | 0.816 |
| Actb     | Nphp1     | 0.816 |
| Tmf1     | Map3k2    | 0.816 |
| Nbr1     | Cebpb     | 0.816 |
| Prkce    | Fus       | 0.816 |
| Ube2l3   | Chuk      | 0.816 |
| Aldoa    | Myo1c     | 0.816 |
| Akr1b3   | Myog      | 0.816 |
| Akr1b3   | Rps13     | 0.816 |
| Trip4    | Snopc4    | 0.816 |
| Ubb      | Cdh2      | 0.816 |
| Pxn      | Arhgef7   | 0.816 |
| H1f0     | Plec      | 0.816 |
| Fancd2   | Dnmt1     | 0.816 |

|         |           |       |
|---------|-----------|-------|
| Thoc4   | Nr3c1     | 0.816 |
| Dbnl    | Casp3     | 0.816 |
| Dynll1  | Calm2     | 0.816 |
| Dynll1  | Hspa4     | 0.816 |
| Dynll1  | Eprs      | 0.816 |
| Map3k5  | Mapk14    | 0.816 |
| Smad4   | Lef1      | 0.816 |
| Hba-a1  | Mdh2      | 0.816 |
| Cblb    | Nfatc1    | 0.816 |
| Suz12   | Atp5d     | 0.816 |
| Pcna    | Cdkn1a    | 0.816 |
| Mcm6    | Lhx2      | 0.816 |
| Pdlim5  | Enah      | 0.816 |
| Lef1    | Ctnna1    | 0.816 |
| Topbp1  | Ncapg2    | 0.816 |
| Topbp1  | Mphosph10 | 0.816 |
| Bat1a   | Hras1     | 0.816 |
| Foxh1   | Dlx1      | 0.816 |
| Irf1    | Sumo1     | 0.816 |
| Bag1    | Hdac3     | 0.815 |
| Mecp2   | Rorc      | 0.815 |
| Gtf2a1l | Nfkbia    | 0.815 |
| Psma4   | Exoc4     | 0.815 |
| Shc1    | Inpp5d    | 0.815 |
| Cited4  | Mixl1     | 0.815 |
| Mtap2   | Grin1     | 0.815 |
| Bcl11b  | Atm       | 0.815 |
| Sgk1    | Scn3a     | 0.815 |
| Id3     | Rai14     | 0.815 |
| Id3     | Krt6a     | 0.815 |
| Id3     | Ciita     | 0.815 |
| Id3     | Tubb5     | 0.815 |
| Psbm5   | Pkd2      | 0.815 |
| Psbm5   | Myog      | 0.815 |
| Psbm4   | Cct6a     | 0.815 |
| Psbm4   | Ngfr      | 0.815 |
| Psbm1   | Pcmt1     | 0.815 |
| Psbm1   | Rps27a    | 0.815 |
| Usp2    | Mpl       | 0.815 |
| Sod1    | Krt76     | 0.815 |
| Sod1    | Telo2     | 0.815 |
| Sod1    | Ulk1      | 0.815 |
| Atp6v1a | Traf6     | 0.815 |
| Gata4   | Med1      | 0.815 |
| Tle1    | Arntl     | 0.815 |
| Tle1    | Kdm5b     | 0.815 |

|         |         |       |
|---------|---------|-------|
| Psen2   | Eea1    | 0.815 |
| Esr1    | Sh3bp2  | 0.815 |
| Sox2    | Pparg   | 0.815 |
| Mapt    | Ube2n   | 0.815 |
| Mtf2    | Thoc4   | 0.815 |
| Egr2    | Prkdc   | 0.815 |
| Egr2    | Foxo3   | 0.815 |
| Gtf2e2  | Tardbp  | 0.815 |
| Tmf1    | Fert2   | 0.815 |
| Tmf1    | Uchl1   | 0.815 |
| Gsc     | Cacna1c | 0.815 |
| Crebbp  | Rela    | 0.815 |
| Nbr1    | Ube2n   | 0.815 |
| Nbr1    | Ppp2cb  | 0.815 |
| Nbr1    | Usp8    | 0.815 |
| Prkce   | Calm1   | 0.815 |
| Bhlhe41 | Kat2b   | 0.815 |
| Pparg   | Nfe2l2  | 0.815 |
| Ubb     | Myod1   | 0.815 |
| Tle6    | Foxp1   | 0.815 |
| Fancd2  | Prkdc   | 0.815 |
| Map3k1  | Mapk8   | 0.815 |
| Eif4a1  | Rps13   | 0.815 |
| Smad2   | Cflar   | 0.815 |
| Smad2   | Mycn    | 0.815 |
| Hba-a1  | Hnrnpk  | 0.815 |
| Cc2d2a  | Krt42   | 0.815 |
| Suz12   | Rps13   | 0.815 |
| Rps13   | Ptrf    | 0.815 |
| Iqgap1  | Cdc42   | 0.815 |
| Zfp277  | Phf2    | 0.815 |
| Zfp277  | H3f3a   | 0.815 |
| Rpl7    | Hspa9   | 0.815 |
| Tbp     | Sumo1   | 0.815 |
| Bat1a   | Rab5a   | 0.815 |
| Bat1a   | Flt1    | 0.815 |
| Cd3e    | Vav1    | 0.815 |
| Dll1    | Notch1  | 0.815 |
| Bag1    | Ldhb    | 0.814 |
| Map2k4  | Chuk    | 0.814 |
| Ptprq   | Ctnna1  | 0.814 |
| Trim66  | Chaf1a  | 0.814 |
| Rcor2   | Lmo3    | 0.814 |
| Ncstn   | Hsp90b1 | 0.814 |
| Dok1    | Inpp5d  | 0.814 |
| Cd40    | Birc3   | 0.814 |

|           |          |       |
|-----------|----------|-------|
| Card11    | Sash1    | 0.814 |
| Rnh1      | Cep290   | 0.814 |
| Rnh1      | Mtap6    | 0.814 |
| Bcl11b    | Ccnb1    | 0.814 |
| Actbl2    | Eef1g    | 0.814 |
| Id3       | Bag2     | 0.814 |
| Id3       | Amfr     | 0.814 |
| Id3       | Zdhhc15  | 0.814 |
| Cd2ap     | Sh2b2    | 0.814 |
| Homer2    | Homer1   | 0.814 |
| Psmb5     | Smn1     | 0.814 |
| Psmb5     | Hsp90aa1 | 0.814 |
| Zfand2a   | Psm1     | 0.814 |
| Rac1      | Dlg2     | 0.814 |
| Usp2      | Traf3    | 0.814 |
| Usp2      | Ctcf     | 0.814 |
| Usp2      | Notch1   | 0.814 |
| Hnrnpa2b1 | Ccnd2    | 0.814 |
| Eif3b     | Hnrnpk   | 0.814 |
| Eif3b     | Rps5     | 0.814 |
| Sod1      | Traf6    | 0.814 |
| Sod1      | Vim      | 0.814 |
| Sod1      | Atp5d    | 0.814 |
| Sod1      | Foxo3    | 0.814 |
| Sod1      | Hnrnpa1  | 0.814 |
| Gtf2h1    | Ankrd49  | 0.814 |
| Pcgf2     | Mph1     | 0.814 |
| Traf6     | Nphp1    | 0.814 |
| Bub1      | Anapc7   | 0.814 |
| Hcst      | Klrk1    | 0.814 |
| Rai14     | Abtb1    | 0.814 |
| Zfp354a   | Ubr5     | 0.814 |
| Efs       | Kdr      | 0.814 |
| Mapt      | Sykb     | 0.814 |
| Mtf2      | BC018507 | 0.814 |
| Mtf2      | Nap1l4   | 0.814 |
| Tctn1     | Krt2     | 0.814 |
| Tctn1     | Rps27a   | 0.814 |
| Egr2      | Plagl2   | 0.814 |
| Birc3     | Ltbr     | 0.814 |
| Tmf1      | Csf1r    | 0.814 |
| Rbck1     | Rnf31    | 0.814 |
| Bhlhe41   | Bahd1    | 0.814 |
| Akr1b3    | Cyca     | 0.814 |
| Akr1b3    | Tuba1b   | 0.814 |
| Akr1b3    | Eif2a    | 0.814 |

|           |         |       |
|-----------|---------|-------|
| Tirap     | Trim8   | 0.814 |
| Itgb1     | Cdh17   | 0.814 |
| Trim35    | Jarid2  | 0.814 |
| Kdm4c     | Ppp1cc  | 0.814 |
| Kdm4c     | Lef1    | 0.814 |
| Ubb       | Tuba1a  | 0.814 |
| Smad2     | Junb    | 0.814 |
| Snopc4    | Ing1    | 0.814 |
| Hba-a1    | Purb    | 0.814 |
| Hba-a1    | Alb     | 0.814 |
| Hsp90aa1  | Nphp1   | 0.814 |
| Gtf3c1    | Hoxd12  | 0.814 |
| Suz12     | Fasn    | 0.814 |
| Cask      | Mpp5    | 0.814 |
| Top2a     | Eif3i   | 0.814 |
| Sf3b1     | Dgcr8   | 0.814 |
| Casp8     | Cdh1    | 0.814 |
| Lef1      | Prdm16  | 0.814 |
| Topbp1    | Arfgap2 | 0.814 |
| Bat1a     | Hsp90b1 | 0.814 |
| Bat1a     | Cebpb   | 0.814 |
| Cav1      | Flot1   | 0.814 |
| Bag1      | Dctn1   | 0.813 |
| Bag1      | Ckm     | 0.813 |
| Bag1      | Efhd2   | 0.813 |
| B2m       | Was     | 0.813 |
| Map2k2    | Ptk2b   | 0.813 |
| Mecp2     | Per2    | 0.813 |
| Mecp2     | Hnf1a   | 0.813 |
| Shc1      | Dok1    | 0.813 |
| Shc1      | Pxn     | 0.813 |
| Shc1      | Nfatc1  | 0.813 |
| Pik3r1    | Irs1    | 0.813 |
| Als2      | Actg1   | 0.813 |
| Epha2     | Cryab   | 0.813 |
| Epc1      | Tle6    | 0.813 |
| LOC674895 | Map2k1  | 0.813 |
| Flna      | Jup     | 0.813 |
| Krt10     | Invs    | 0.813 |
| Gbbp1     | Nf1     | 0.813 |
| Cited4    | Hnf1a   | 0.813 |
| Axin1     | Lrrk2   | 0.813 |
| Rnh1      | Med14   | 0.813 |
| Actbl2    | Krt14   | 0.813 |
| Id2       | Sfn     | 0.813 |
| Cd2ap     | Cdk6    | 0.813 |

|         |          |       |
|---------|----------|-------|
| Ssbp2   | Lmo4     | 0.813 |
| Psmb5   | Uchl1    | 0.813 |
| Psmb4   | Psmb1    | 0.813 |
| Tcerg1  | Sumo1    | 0.813 |
| Usp2    | Pea15b   | 0.813 |
| Usp2    | Tsnax    | 0.813 |
| Eif3b   | Acta1    | 0.813 |
| Sod1    | Tmf1     | 0.813 |
| Cdk5    | Ccnd1    | 0.813 |
| Tcf4    | Tcf12    | 0.813 |
| Crkl    | Zap70    | 0.813 |
| Traf6   | Poli     | 0.813 |
| Rab3d   | Ndufa9   | 0.813 |
| Rab4a   | Map3k5   | 0.813 |
| Naglu   | Pcbp1    | 0.813 |
| Esr1    | Pou6f1   | 0.813 |
| Mtf2    | Polr3f   | 0.813 |
| Zfp236  | Pax6     | 0.813 |
| Ctnnd1  | Lrp1     | 0.813 |
| Egr2    | Ufd1l    | 0.813 |
| Birc2   | Tab2     | 0.813 |
| Birc2   | Mapk8ip1 | 0.813 |
| Nbr1    | Uchl1    | 0.813 |
| Nbr1    | Slc1a2   | 0.813 |
| Prkca   | Cul5     | 0.813 |
| Bhlhe41 | Polr1a   | 0.813 |
| Aldoa   | Rnf11    | 0.813 |
| Sall4   | Hdac1    | 0.813 |
| Sf3b2   | Sumo1    | 0.813 |
| Pparg   | Fem1a    | 0.813 |
| Kdm4c   | Klf4     | 0.813 |
| Kdm4c   | Smarcd3  | 0.813 |
| Zfp110  | Psmc3    | 0.813 |
| Ubb     | Eif4a1   | 0.813 |
| Ubb     | Zfp292   | 0.813 |
| Tek     | Fos      | 0.813 |
| Fancd2  | Cebpb    | 0.813 |
| Dynll1  | Hsp90ab1 | 0.813 |
| Cdk1    | Pcna     | 0.813 |
| Mpnd    | Fez1     | 0.813 |
| Mdc1    | Nbn      | 0.813 |
| Angptl2 | Uqcrc1   | 0.813 |
| Ptma    | Rorc     | 0.813 |
| Ruvbl2  | Nrbp1    | 0.813 |
| Sf3b1   | Hnrnpk   | 0.813 |
| Nrip1   | Ncor1    | 0.813 |



|           |          |       |
|-----------|----------|-------|
| Vezf1     | Fasn     | 0.813 |
| Map2k4    | Pik3r1   | 0.812 |
| Ap1b1     | Cited2   | 0.812 |
| Mecp2     | Gon4l    | 0.812 |
| Mecp2     | Kdm5b    | 0.812 |
| Shc3      | Cav3     | 0.812 |
| Psma4     | Myh10    | 0.812 |
| Psma4     | Tubb5    | 0.812 |
| Shc1      | Traf6    | 0.812 |
| Shc1      | Ppp2r3a  | 0.812 |
| Sorbs1    | Cd40     | 0.812 |
| Epha2     | Ndufa4   | 0.812 |
| Usf1      | Nupr1    | 0.812 |
| Gpbp1     | E2f1     | 0.812 |
| Axin2     | Ctnnb1   | 0.812 |
| Rnh1      | Prkdc    | 0.812 |
| Bcl11b    | Pitx2    | 0.812 |
| Per1      | Per3     | 0.812 |
| Id2       | Pbx4     | 0.812 |
| Id2       | Hist3h2a | 0.812 |
| Id2       | Psm10    | 0.812 |
| Id3       | Pkp1     | 0.812 |
| Id3       | Psm11    | 0.812 |
| Irf8      | Irf1     | 0.812 |
| Cd2ap     | Nedd4    | 0.812 |
| Cdk6      | Ccnd1    | 0.812 |
| Cdk6      | Cdkn1b   | 0.812 |
| Suv420h1  | Rbl1     | 0.812 |
| Psmb5     | Bcr      | 0.812 |
| Psmb4     | Krt15    | 0.812 |
| Rnf2      | Hdac2    | 0.812 |
| LOC677235 | Arhgap33 | 0.812 |
| Usp2      | Fbxl3    | 0.812 |
| Eif3b     | Pkm2     | 0.812 |
| Eif3b     | Aldoa    | 0.812 |
| Sod1      | Krt8     | 0.812 |
| Sod1      | Cand2    | 0.812 |
| Sod1      | Mapk3    | 0.812 |
| Sod1      | Hdac6    | 0.812 |
| Sod1      | Rpl7     | 0.812 |
| Slc2a4    | Flot1    | 0.812 |
| Pura      | Dbnl     | 0.812 |
| Tcf12     | Bhlhe41  | 0.812 |
| Hist1h1a  | Cdk2     | 0.812 |
| Esr1      | Hhex     | 0.812 |
| Esr1      | Gli1     | 0.812 |

|          |           |       |
|----------|-----------|-------|
| Mapt     | Nlr1      | 0.812 |
| Egr2     | Tab3      | 0.812 |
| Mix1     | Ewsr1     | 0.812 |
| Tmf1     | Smurf1    | 0.812 |
| Tmf1     | Sh3gl2    | 0.812 |
| Foxn2    | Hoxb4     | 0.812 |
| Dag1     | Cav3      | 0.812 |
| Nbr1     | Prkcd     | 0.812 |
| Hsf1     | Hdac6     | 0.812 |
| Hbb-b1   | Mog       | 0.812 |
| Aldoa    | Tnfrsf13c | 0.812 |
| Aldoa    | Ubap2l    | 0.812 |
| Akr1b3   | Tubb2b    | 0.812 |
| Hnf4a    | Ppargc1a  | 0.812 |
| Pparg    | Cdkn1a    | 0.812 |
| Kdm4c    | Ctnnb1    | 0.812 |
| Zfp110   | Fancd2    | 0.812 |
| Zfp110   | Reg1      | 0.812 |
| Dnm1     | Tuba1a    | 0.812 |
| Dynll1   | Myo1c     | 0.812 |
| Syn2     | Tufm      | 0.812 |
| Eif4a1   | Eprs      | 0.812 |
| Grin2a   | Cttn      | 0.812 |
| Klrb1c   | Nr1i3     | 0.812 |
| Mapk8    | Jun       | 0.812 |
| Rps13    | Eif2a     | 0.812 |
| Rps13    | Eif3e     | 0.812 |
| Hist3h2a | Hif1a     | 0.812 |
| Slit3    | Ighmbp2   | 0.812 |
| Vezf1    | Vav1      | 0.812 |
| Topbp1   | Ap2a1     | 0.812 |
| Ap1b1    | Eif4g3    | 0.811 |
| Mecp2    | Ccne1     | 0.811 |
| Mecp2    | Nfkb1     | 0.811 |
| Mecp2    | Jarid2    | 0.811 |
| Shc1     | Phf20     | 0.811 |
| Flna     | Krt77     | 0.811 |
| Rarg     | Hif1a     | 0.811 |
| Jup      | Pcp2      | 0.811 |
| Itch     | Tax1bp1   | 0.811 |
| Rnh1     | Glud1     | 0.811 |
| Rnh1     | Invs      | 0.811 |
| Rnh1     | Hsp90ab1  | 0.811 |
| Bcl11b   | Cul2      | 0.811 |
| Bcl11b   | Ncoa1     | 0.811 |
| Bcl11b   | Atp5d     | 0.811 |

|          |         |       |
|----------|---------|-------|
| Id2      | Cdk4    | 0.811 |
| Cd2ap    | Nfatc1  | 0.811 |
| Rac1     | Vdac1   | 0.811 |
| Nedd9    | Gnb2l1  | 0.811 |
| Usp2     | Dusp1   | 0.811 |
| Usp2     | Tab2    | 0.811 |
| Usp2     | Dlg1    | 0.811 |
| Eif3b    | Tuba3a  | 0.811 |
| Sod1     | Poli    | 0.811 |
| Lmna     | Iqcb1   | 0.811 |
| Iqcb1    | Actb    | 0.811 |
| Gfi1     | Pias3   | 0.811 |
| Gata6    | Med1    | 0.811 |
| Epm2a    | V1rd20  | 0.811 |
| Traf3    | Birc3   | 0.811 |
| Traf6    | Fos     | 0.811 |
| Bub1     | Crem    | 0.811 |
| Ccdc101  | Map2k7  | 0.811 |
| Tcf12    | Dot1l   | 0.811 |
| Tcf12    | Polr1a  | 0.811 |
| Psen2    | Plp1    | 0.811 |
| Max      | Tsix    | 0.811 |
| Dnajb6   | H1f0    | 0.811 |
| Tmf1     | Bcr     | 0.811 |
| Tmf1     | Ppp2cb  | 0.811 |
| Foxn2    | Gtf2h2  | 0.811 |
| Nbr1     | Mapk3   | 0.811 |
| Hbb-b1   | Hnrnpa1 | 0.811 |
| Cyld     | Hhex    | 0.811 |
| Cyld     | Fos     | 0.811 |
| Aldoa    | Rps13   | 0.811 |
| Akr1b3   | Adrm1   | 0.811 |
| Med1     | Bmi1    | 0.811 |
| Ppargc1a | Zfp111  | 0.811 |
| Ncoa6    | Cbfb    | 0.811 |
| Trip4    | Dnmt1   | 0.811 |
| Kdm4c    | Mef2d   | 0.811 |
| Zfp110   | Sykb    | 0.811 |
| Uba52    | Atxn2   | 0.811 |
| H1f0     | Cdkn1b  | 0.811 |
| Fancd2   | Brca1   | 0.811 |
| Pbx1     | Hoxa6   | 0.811 |
| Eif4a1   | Hba-a1  | 0.811 |
| Smad2    | Pex6    | 0.811 |
| Angptl2  | Sobp    | 0.811 |
| Ifrd1    | Gon4l   | 0.811 |

|           |          |       |
|-----------|----------|-------|
| Topbp1    | Rbm8a    | 0.811 |
| Bat1a     | Tax1bp1  | 0.811 |
| Trpc4     | Cav1     | 0.811 |
| Jun       | Ctnnb1   | 0.811 |
| Bag1      | Ezh2     | 0.81  |
| Bag1      | Rela     | 0.81  |
| Mef2a     | Ywhab    | 0.81  |
| Map2k2    | Ctnn     | 0.81  |
| Ap1b1     | Csk      | 0.81  |
| Shc1      | Nbr1     | 0.81  |
| Shc1      | Clybl    | 0.81  |
| Sorbs1    | Pik3r1   | 0.81  |
| Sorbs1    | Smad7    | 0.81  |
| Col5a1    | Smad3    | 0.81  |
| Dok1      | Rasa1    | 0.81  |
| Cd40      | Birc2    | 0.81  |
| Rnh1      | Hsph1    | 0.81  |
| Rnh1      | Pi4ka    | 0.81  |
| Rnh1      | Pcbp1    | 0.81  |
| Bcl11b    | Map2k1   | 0.81  |
| Bcl11b    | Bax      | 0.81  |
| Dync1h1   | Kif5b    | 0.81  |
| Id2       | Jarid2   | 0.81  |
| Id3       | Eif4a2   | 0.81  |
| Irf8      | Rhoa     | 0.81  |
| Psmb4     | Nap1l4   | 0.81  |
| Psmb1     | Dynll1   | 0.81  |
| Rac1      | Hras1    | 0.81  |
| Aip       | Calcoco1 | 0.81  |
| LOC677235 | Frmd4b   | 0.81  |
| Usp2      | Foxp1    | 0.81  |
| Usp2      | Runx2    | 0.81  |
| Hnrnpa2b1 | Adcy8    | 0.81  |
| Eif3b     | Cops4    | 0.81  |
| Sod1      | Krt6a    | 0.81  |
| Iqcb1     | Nphp1    | 0.81  |
| Traf6     | Chordc1  | 0.81  |
| Hist2h4   | Ikbkg    | 0.81  |
| Tcf12     | Rarb     | 0.81  |
| Mapt      | Cflar    | 0.81  |
| Nlr1      | Ikbkg    | 0.81  |
| Dnajb6    | Ifrd1    | 0.81  |
| Ncoa3     | Lass2    | 0.81  |
| Egr2      | Rela     | 0.81  |
| Hbb-b1    | Ldb3     | 0.81  |
| Aldoa     | Ube2d3   | 0.81  |

|          |          |       |
|----------|----------|-------|
| Akr1b3   | Cops4    | 0.81  |
| Cbx2     | Bmi1     | 0.81  |
| Gm10358  | Actr1a   | 0.81  |
| Sf3b2    | Rnf111   | 0.81  |
| Zfp473   | Ssbp4    | 0.81  |
| Pparg    | Ms4a2    | 0.81  |
| Kdm4c    | Myod1    | 0.81  |
| Zfp110   | Skil     | 0.81  |
| Pxn      | Limk1    | 0.81  |
| Dbnl     | Aph1a    | 0.81  |
| Syn2     | Dclk1    | 0.81  |
| Syn2     | Hdac2    | 0.81  |
| Eif4a1   | Eno3     | 0.81  |
| Cdk1     | Ppp1cc   | 0.81  |
| Smad1    | Psmc3    | 0.81  |
| Hba-a1   | Ubqln2   | 0.81  |
| Chmp5    | Tbrg1    | 0.81  |
| Rps13    | Rpl22    | 0.81  |
| Gab1     | Csf1r    | 0.81  |
| Tbp      | Plagl2   | 0.81  |
| Casp8    | Cdkn1a   | 0.81  |
| Casp8    | Foxo3    | 0.81  |
| Dr1      | Zzz3     | 0.81  |
| Bag1     | Vcp      | 0.809 |
| Mecp2    | Ncoa1    | 0.809 |
| Mecp2    | Lass5    | 0.809 |
| Tnfaip3  | Tnfrsf1a | 0.809 |
| Gtf2a1l  | Gata6    | 0.809 |
| Gtf2a1l  | Sfpi1    | 0.809 |
| Psm4     | Atp5a1   | 0.809 |
| Epha2    | Actc1    | 0.809 |
| Rad51    | Etv4     | 0.809 |
| Cited4   | Hist3h2a | 0.809 |
| Rnh1     | Bag2     | 0.809 |
| Bcl11b   | Syt1     | 0.809 |
| Sh3kbp1  | Inpp5d   | 0.809 |
| Cry1     | Fbxl3    | 0.809 |
| Id2      | Hoxa10   | 0.809 |
| Id3      | Rnf14    | 0.809 |
| Id1      | Myf5     | 0.809 |
| Suv420h1 | Rbl2     | 0.809 |
| Psmb5    | Tardbp   | 0.809 |
| Psmb4    | Myh3     | 0.809 |
| Psmb4    | Krt77    | 0.809 |
| Psmb4    | Fyn      | 0.809 |
| Psmb4    | Prkcs    | 0.809 |

|         |          |       |
|---------|----------|-------|
| Psmb1   | Krt2     | 0.809 |
| Usp2    | Slc1a2   | 0.809 |
| Eif3b   | Ap2a1    | 0.809 |
| Cmtm3   | Map4k1   | 0.809 |
| Sod1    | Ywhaz    | 0.809 |
| Sod1    | Atg16l1  | 0.809 |
| Lmnb1   | Hnrnpu   | 0.809 |
| Lmnb1   | Nfe2l2   | 0.809 |
| Gtf2h1  | Gtf2e1   | 0.809 |
| Sirt1   | Ppargc1a | 0.809 |
| Rab7    | Anxa3    | 0.809 |
| Pura    | Atp5b    | 0.809 |
| Ldb2    | Lhx4     | 0.809 |
| Ccnd1   | Cdkn1a   | 0.809 |
| Psen2   | Cacna1c  | 0.809 |
| Efs     | Prkce    | 0.809 |
| Esr1    | Pxn      | 0.809 |
| Tlr4    | Ikbkg    | 0.809 |
| Max     | Iqgap1   | 0.809 |
| Sox3    | Chek1    | 0.809 |
| Mapt    | Nbr1     | 0.809 |
| Mapt    | Stub1    | 0.809 |
| Mapt    | Fbxo2    | 0.809 |
| Egr2    | Sp1      | 0.809 |
| Sgcz    | Sgcb     | 0.809 |
| Tmf1    | Cblb     | 0.809 |
| Tmf1    | Usp8     | 0.809 |
| Musk    | Pak1     | 0.809 |
| Nbr1    | Irak1    | 0.809 |
| Ncam1   | Cntn1    | 0.809 |
| Prkce   | Peli2    | 0.809 |
| Cenpv   | Gnb2l1   | 0.809 |
| Cenpv   | Plp1     | 0.809 |
| Hbb-b1  | Suz12    | 0.809 |
| Ncoa6   | Taf15    | 0.809 |
| Ncoa6   | Runx1    | 0.809 |
| Zfp110  | Pten     | 0.809 |
| Phc3    | Cbx4     | 0.809 |
| Ubb     | Dsp      | 0.809 |
| Ubb     | Gria2    | 0.809 |
| Zfpm1   | Pdx1     | 0.809 |
| Il1r1   | Irak1    | 0.809 |
| Dbnl    | Sfn      | 0.809 |
| Chordc1 | Hsp90ab1 | 0.809 |
| Eef1a1  | Dclk1    | 0.809 |
| Chmp5   | Tada3    | 0.809 |

|           |         |       |
|-----------|---------|-------|
| Vcp       | Ufd1l   | 0.809 |
| Suz12     | Ptrf    | 0.809 |
| Rps13     | Hnrnpk  | 0.809 |
| Ubqln2    | Kars    | 0.809 |
| Rpl7      | Rps5    | 0.809 |
| Casp8     | Jun     | 0.809 |
| Topbp1    | Mad2l1  | 0.809 |
| Bat1a     | Eif3i   | 0.809 |
| Fasn      | Nup155  | 0.809 |
| Cops3     | Gps1    | 0.808 |
| Csnk1e    | Per2    | 0.808 |
| Ldlrap1   | Topbp1  | 0.808 |
| Map2k3    | Stk39   | 0.808 |
| Map2k4    | Map3k7  | 0.808 |
| Gjb3      | Gmcl1   | 0.808 |
| Psma4     | Gabra1  | 0.808 |
| Epha2     | Rnh1    | 0.808 |
| Flna      | Tubb5   | 0.808 |
| Rad51     | Kat5    | 0.808 |
| Zbtb3     | Zbtb39  | 0.808 |
| Bcl11b    | Rarb    | 0.808 |
| Actbl2    | Pcgf1   | 0.808 |
| Irf8      | Dlg1    | 0.808 |
| Cd2ap     | Abl1    | 0.808 |
| Zbtb7c    | Ncor1   | 0.808 |
| Cul3      | Ezh2    | 0.808 |
| Psmb5     | Gata6   | 0.808 |
| Tcerg1    | Rfx2    | 0.808 |
| Tcerg1    | Ap2m1   | 0.808 |
| LOC677235 | Dock7   | 0.808 |
| Usp2      | Ube2n   | 0.808 |
| Sod1      | Lasp1   | 0.808 |
| Sod1      | Eif2c2  | 0.808 |
| Ywhab     | Arhgef7 | 0.808 |
| Fadd      | Cflar   | 0.808 |
| Fadd      | Casp8   | 0.808 |
| Psen1     | Aph1b   | 0.808 |
| Rab3d     | Stxbp1  | 0.808 |
| Rab3d     | Ldha    | 0.808 |
| Pura      | Ywhaz   | 0.808 |
| Pura      | Ccna1   | 0.808 |
| Stoml3    | Adcy3   | 0.808 |
| Esr1      | Rhoq    | 0.808 |
| Esr1      | Gsk3a   | 0.808 |
| Sox2      | Mdm2    | 0.808 |
| Etv6      | Tet2    | 0.808 |

|          |           |       |
|----------|-----------|-------|
| Etv6     | Clock     | 0.808 |
| Sla2     | Was       | 0.808 |
| Egr2     | Plk1      | 0.808 |
| Birc2    | Mib2      | 0.808 |
| Tmf1     | Camk1     | 0.808 |
| Magi2    | Chuk      | 0.808 |
| Nbr1     | Pparg     | 0.808 |
| Nbr1     | Ripk2     | 0.808 |
| Prkcd    | Ubb       | 0.808 |
| Prkce    | Sh3bp2    | 0.808 |
| Hbb-b1   | Acta1     | 0.808 |
| Cyld     | Sykb      | 0.808 |
| Akr1b3   | Hist1h2ai | 0.808 |
| Tirap    | Jak2      | 0.808 |
| Smadcb1  | Fos       | 0.808 |
| Zfp446   | Isl2      | 0.808 |
| Zfp473   | Zscan2    | 0.808 |
| Ppargc1a | Nr1h4     | 0.808 |
| Phc3     | Tfdp1     | 0.808 |
| Ubb      | Hspb1     | 0.808 |
| Dok3     | Cbl       | 0.808 |
| H1f0     | Ltb       | 0.808 |
| Capn2    | Pcyt1a    | 0.808 |
| Eef1a1   | Actn1     | 0.808 |
| Hba-a1   | Pcbp1     | 0.808 |
| Chmp5    | Ttc4      | 0.808 |
| Polr1b   | Taf1b     | 0.808 |
| Suz12    | Strap     | 0.808 |
| Hist3h2a | Rxrg      | 0.808 |
| Hist3h2a | Foxo3     | 0.808 |
| Hoxd10   | Hoxa11    | 0.808 |
| Rpl7     | Fbln2     | 0.808 |
| Sf3b1    | Usp7      | 0.808 |
| Tbp      | Nrip1     | 0.808 |
| Bag1     | Bax       | 0.807 |
| Bag1     | Gnb2l1    | 0.807 |
| Bag1     | Vdac2     | 0.807 |
| Acaa2    | Actn4     | 0.807 |
| Ap1b1    | Rnps1     | 0.807 |
| Mecp2    | Bcl11b    | 0.807 |
| Gtf2a1l  | Gmnn      | 0.807 |
| Flna     | Hsp90aa1  | 0.807 |
| Gpbp1    | Cnot3     | 0.807 |
| Cited4   | Khdrbs1   | 0.807 |
| Cited4   | E2f1      | 0.807 |
| Spna1    | Grin1     | 0.807 |



|         |          |       |
|---------|----------|-------|
| Rnh1    | Eef2     | 0.807 |
| Id3     | Ercc8    | 0.807 |
| Id3     | Taf15    | 0.807 |
| Id3     | Spdef    | 0.807 |
| Raf1    | Hras1    | 0.807 |
| Raf1    | Tubg1    | 0.807 |
| Psmb5   | Tnk2     | 0.807 |
| Psmb4   | Reg1     | 0.807 |
| Invs    | Hspa8    | 0.807 |
| Tcerg1  | Lims1    | 0.807 |
| Usp2    | Ptk2     | 0.807 |
| Usp2    | App      | 0.807 |
| Usp2    | Ccne1    | 0.807 |
| Usp2    | Per3     | 0.807 |
| Usp2    | Pdgfrb   | 0.807 |
| Sod1    | Gsc      | 0.807 |
| Gtf2i   | Egr2     | 0.807 |
| Ptk2    | Bcl2     | 0.807 |
| Tcf7l1  | Esr1     | 0.807 |
| Traf2   | Birc3    | 0.807 |
| Traf6   | Irf3     | 0.807 |
| Rab3d   | Slc1a2   | 0.807 |
| Ccdc101 | Nup88    | 0.807 |
| Barx2   | Srf      | 0.807 |
| Efs     | Csf1r    | 0.807 |
| Esr1    | Diap1    | 0.807 |
| Dnajb6  | Atm      | 0.807 |
| Egr2    | Bcl2     | 0.807 |
| Egr2    | Cd79a    | 0.807 |
| Egr2    | Vdac1    | 0.807 |
| Stat3   | Stat1    | 0.807 |
| Ncor2   | Nr1h4    | 0.807 |
| Krt77   | Nphp1    | 0.807 |
| Nbr1    | Pten     | 0.807 |
| Prkcd   | Zfp110   | 0.807 |
| Prkce   | Dnm1     | 0.807 |
| Bhlhe41 | Pcna     | 0.807 |
| Cenpv   | Usp7     | 0.807 |
| Cyld    | Hsp90aa1 | 0.807 |
| Aldoa   | Vcp      | 0.807 |
| Smurf1  | Pard6a   | 0.807 |
| Pik3c2b | Arhgap31 | 0.807 |
| Pparg   | Thra     | 0.807 |
| Ncoa6   | Usp7     | 0.807 |
| H1f0    | Cdkn1a   | 0.807 |
| Gm7611  | Dclk2    | 0.807 |

|        |         |       |
|--------|---------|-------|
| Nfe2l2 | Ptma    | 0.807 |
| Map3k7 | Mib2    | 0.807 |
| Map3k7 | Peli2   | 0.807 |
| Ppia   | Hist4h4 | 0.807 |
| Ubqln2 | Mylpf   | 0.807 |
| Zfp277 | Rps3    | 0.807 |
| Tceb1  | Asb2    | 0.807 |
| Rpl7   | Fbxw7   | 0.807 |
| Ppp5c  | Dlg2    | 0.807 |
| Src    | Csf1r   | 0.807 |
| Topbp1 | Nup155  | 0.807 |
| Ctnnb1 | Cdh1    | 0.807 |
| Rara   | Nrip1   | 0.806 |
| Mef2a  | Col1a1  | 0.806 |
| Map2k6 | Atf2    | 0.806 |
| Map2k6 | Peli2   | 0.806 |
| Mecp2  | Smyd1   | 0.806 |
| Mecp2  | Snopc4  | 0.806 |
| Mecp2  | Hoxb1   | 0.806 |
| Psma4  | Krt42   | 0.806 |
| Shc1   | Msx2    | 0.806 |
| Shc1   | Lepr    | 0.806 |
| Ptprq  | Ctnnd1  | 0.806 |
| Npm1   | Tcf3    | 0.806 |
| Als2   | Ap2b1   | 0.806 |
| Epha2  | Rps27a  | 0.806 |
| Epc1   | Actg1   | 0.806 |
| Flna   | Psma1   | 0.806 |
| Usf1   | Tal1    | 0.806 |
| Usf1   | Foxo3   | 0.806 |
| Rad51  | Dnm1l   | 0.806 |
| Stk38  | Eed     | 0.806 |
| Dok1   | Bcr     | 0.806 |
| Rnh1   | Dab1    | 0.806 |
| Sgk1   | Scn2a1  | 0.806 |
| Cd2ap  | Ap2b1   | 0.806 |
| Cd2ap  | Foxp1   | 0.806 |
| Cd2ap  | Cblb    | 0.806 |
| Homer1 | Itpr1   | 0.806 |
| Psbm4  | Birc3   | 0.806 |
| Psbm1  | Krt77   | 0.806 |
| Usp2   | Scn5a   | 0.806 |
| Usp2   | Mitf    | 0.806 |
| Eif3b  | Grip1   | 0.806 |
| Sod1   | Calr    | 0.806 |
| Sod1   | Sfn     | 0.806 |

|         |            |       |
|---------|------------|-------|
| Sod1    | Hnrnpm     | 0.806 |
| Lmnb2   | Lmnb1      | 0.806 |
| Iqcb1   | Hspa8      | 0.806 |
| Iqcb1   | Tuba1b     | 0.806 |
| Tcf7l2  | Hnf4a      | 0.806 |
| Pkd2    | Vcp        | 0.806 |
| Traf6   | Zfp110     | 0.806 |
| Hist2h4 | Ep300      | 0.806 |
| Pura    | Irs1       | 0.806 |
| Pura    | Rfpl4      | 0.806 |
| Pura    | Rpsa       | 0.806 |
| Ahi1    | Mks1       | 0.806 |
| Tle1    | Ezh2       | 0.806 |
| Hnf1a   | Emx1       | 0.806 |
| Tcf12   | Zfp277     | 0.806 |
| Cops2   | Setdb1     | 0.806 |
| Ccnd1   | Ppp1cc     | 0.806 |
| Usp9x   | Neur12     | 0.806 |
| Max     | Bcl2       | 0.806 |
| Mapt    | Casp9      | 0.806 |
| Pou2f1  | Hoxb8      | 0.806 |
| Egr2    | Myod1      | 0.806 |
| Pias1   | Sufu       | 0.806 |
| Birc3   | Mdm4       | 0.806 |
| Ezh2    | Suz12      | 0.806 |
| Prkce   | Map1lc3b   | 0.806 |
| Ube2i   | Olig2      | 0.806 |
| Cyld    | Ngfr       | 0.806 |
| Aldoa   | Hsp90ab1   | 0.806 |
| Aldoa   | Eprs       | 0.806 |
| Akr1b3  | Pcbp1      | 0.806 |
| Trip4   | Polr1a     | 0.806 |
| Zfpm1   | Mef2d      | 0.806 |
| Syn2    | Nedd4l     | 0.806 |
| Eif4a1  | Prpf31     | 0.806 |
| Eif4a1  | Phf2       | 0.806 |
| Grin1   | Dlg1       | 0.806 |
| Smad4   | Smarcd3    | 0.806 |
| Polr1b  | Atrx       | 0.806 |
| Arrb2   | Nbn        | 0.806 |
| Trim67  | D3Bwg0562e | 0.806 |
| Gmnn    | Tbp        | 0.806 |
| Src     | Ctnnb1     | 0.806 |
| Nrip1   | Ap2a2      | 0.806 |
| Bat1a   | Fos        | 0.806 |
| Oaz3    | Ociad1     | 0.806 |

|           |        |       |
|-----------|--------|-------|
| Socs1     | Jak2   | 0.805 |
| Bag1      | Pfn2   | 0.805 |
| Tet1      | Ifrd1  | 0.805 |
| Map2k4    | Traf3  | 0.805 |
| Mecp2     | Pitx2  | 0.805 |
| Mecp2     | Sox9   | 0.805 |
| Shc1      | Reg1   | 0.805 |
| Rnf41     | Traf6  | 0.805 |
| Krt10     | Jup    | 0.805 |
| Krt10     | Tubb6  | 0.805 |
| Rnh1      | Psmb5  | 0.805 |
| Tcf3      | Myod1  | 0.805 |
| Cry1      | Cry2   | 0.805 |
| Id2       | Tle6   | 0.805 |
| Id3       | Try5   | 0.805 |
| Id3       | Myh9   | 0.805 |
| Irf8      | Slc1a2 | 0.805 |
| Golgb1    | Naglu  | 0.805 |
| Psmb4     | Krt42  | 0.805 |
| Psmb1     | Bag2   | 0.805 |
| LOC677235 | Kif21b | 0.805 |
| Usp2      | Scn9a  | 0.805 |
| Eif3b     | Eif4a1 | 0.805 |
| Sod1      | Hgs    | 0.805 |
| Gtf2h1    | Trip4  | 0.805 |
| Iqcb1     | Krt2   | 0.805 |
| Traf2     | Ltbr   | 0.805 |
| Traf6     | Cflar  | 0.805 |
| Ccdc101   | Gspt1  | 0.805 |
| Ccdc101   | Etv3   | 0.805 |
| Ccdc101   | Topbp1 | 0.805 |
| Pklr      | Smurf2 | 0.805 |
| Naglu     | Esyt1  | 0.805 |
| Mll1      | H3     | 0.805 |
| Esr1      | Jak2   | 0.805 |
| Mtf2      | Zfp82  | 0.805 |
| Nphp3     | Krt2   | 0.805 |
| Nphp3     | Tpi1   | 0.805 |
| Flnc      | Krt78  | 0.805 |
| Kat2a     | Mbip   | 0.805 |
| Birc2     | Ticam1 | 0.805 |
| Mix1      | Dlx2   | 0.805 |
| Tmf1      | Lyn    | 0.805 |
| Ube2l3    | Ikbkb  | 0.805 |
| Hbb-b1    | Eif2a  | 0.805 |
| Hbb-b1    | Hnrnpk | 0.805 |

|            |         |       |
|------------|---------|-------|
| Aldoa      | Il17ra  | 0.805 |
| Aldoa      | Map3k7  | 0.805 |
| Trip4      | Ankrd49 | 0.805 |
| Kdm4c      | Atrx    | 0.805 |
| Zfp110     | Mc4r    | 0.805 |
| Zfpm1      | Hist4h4 | 0.805 |
| D930014E17 | Sh3bp2  | 0.805 |
| Syn2       | Enah    | 0.805 |
| Eif4a1     | Tsc22d3 | 0.805 |
| Eif4a1     | Hnrnpa1 | 0.805 |
| Ubqln2     | Mutyh   | 0.805 |
| Tbrg1      | Mcm10   | 0.805 |
| Lef1       | Pgr     | 0.805 |
| Ell        | Jarid2  | 0.805 |
| Bag1       | Smarcb1 | 0.804 |
| Bach1      | Myod1   | 0.804 |
| Ap1b1      | Atad5   | 0.804 |
| Shc1       | Irf5    | 0.804 |
| Epc1       | Taf15   | 0.804 |
| Flna       | Krt14   | 0.804 |
| Gpbp1      | Lass2   | 0.804 |
| Rad51      | Map2k1  | 0.804 |
| Rad51      | Brca2   | 0.804 |
| Rad51      | Strap   | 0.804 |
| Cited4     | Pygo1   | 0.804 |
| Lancl2     | Dclk2   | 0.804 |
| Card11     | Tmem115 | 0.804 |
| Rnh1       | Akr1b3  | 0.804 |
| Dync1h1    | Nde1    | 0.804 |
| Id3        | Rpsa    | 0.804 |
| Psmb5      | Erbp2   | 0.804 |
| Psmb5      | Casp3   | 0.804 |
| Psmb4      | Polk    | 0.804 |
| Psmb4      | Myh9    | 0.804 |
| Psmb4      | Aldoa   | 0.804 |
| Kdm4b      | Arid1b  | 0.804 |
| LOC677235  | Cacnb1  | 0.804 |
| Usp2       | Park2   | 0.804 |
| Usp2       | Dlg3    | 0.804 |
| Usp2       | Mdm2    | 0.804 |
| Sod1       | Adrbk1  | 0.804 |
| Sod1       | Myod1   | 0.804 |
| Sod1       | Psmc5   | 0.804 |
| Cdk5       | Suds3   | 0.804 |
| Traf6      | Tirap   | 0.804 |
| Rab3d      | Gnao1   | 0.804 |

|         |             |       |
|---------|-------------|-------|
| Hist2h4 | Psm2        | 0.804 |
| Ccdc101 | Nup214      | 0.804 |
| Ccdc101 | Nckap1      | 0.804 |
| Sh2b2   | Insr        | 0.804 |
| Rai14   | Lmx1b       | 0.804 |
| App     | Stub1       | 0.804 |
| Zfp354a | Veze1       | 0.804 |
| Pias3   | Taf10       | 0.804 |
| Psen2   | Psenen      | 0.804 |
| Mtf2    | Clock       | 0.804 |
| Nphp3   | Krt73       | 0.804 |
| Etv6    | Atxn1       | 0.804 |
| Dnajb6  | Bclaf1      | 0.804 |
| Ncoa3   | Lgals3      | 0.804 |
| Egr2    | Mc4r        | 0.804 |
| Birc3   | Map3k1      | 0.804 |
| Mixl1   | Hoxb13      | 0.804 |
| Nbr1    | Pax6        | 0.804 |
| Nbr1    | Ube4b       | 0.804 |
| Cenpv   | Hbb-b1      | 0.804 |
| Hbb-b1  | Myog        | 0.804 |
| Hbb-b1  | Vdac2       | 0.804 |
| Tirap   | Ifngr1      | 0.804 |
| Rhoq    | Flot1       | 0.804 |
| Ubb     | Tle6        | 0.804 |
| Ubb     | Map4k4      | 0.804 |
| Isl2    | Ssbp4       | 0.804 |
| Tek     | Ncor1       | 0.804 |
| Fancd2  | Pcyt1a      | 0.804 |
| Syn2    | Mtap6       | 0.804 |
| Eif4a1  | Ube2v2      | 0.804 |
| Eif4a1  | Ubqln2      | 0.804 |
| Eif4a1  | Rpl22       | 0.804 |
| Eif4a1  | Asap2       | 0.804 |
| Smad2   | Sox15       | 0.804 |
| Snape4  | Ankra2      | 0.804 |
| Hba-a1  | Eif2a       | 0.804 |
| Mapk1   | Mdk         | 0.804 |
| Rps13   | Rpl28       | 0.804 |
| Ubqln2  | Psm2        | 0.804 |
| Ubqln2  | 9130011E15I | 0.804 |
| Ppp5c   | Hoxb8       | 0.804 |
| Prmt5   | Pabpc1      | 0.803 |
| Bag1    | Vdac1       | 0.803 |
| Map2k6  | Ube2n       | 0.803 |
| Mecp2   | Sufu        | 0.803 |

|          |          |       |
|----------|----------|-------|
| Mecp2    | E2f1     | 0.803 |
| Psm4     | Cct3     | 0.803 |
| Psm4     | Prim1    | 0.803 |
| Sorbs1   | Dok3     | 0.803 |
| Rnf41    | Tbk1     | 0.803 |
| Hist1h1e | Chaf1a   | 0.803 |
| Epc1     | Pitx2    | 0.803 |
| Flna     | Krt73    | 0.803 |
| Rarg     | Cebpb    | 0.803 |
| Krt10    | Krt78    | 0.803 |
| Krt10    | Hnrnpm   | 0.803 |
| Cited4   | Rsrc1    | 0.803 |
| Cited4   | Nfe2l2   | 0.803 |
| Dok2     | Dok1     | 0.803 |
| Rnh1     | Cox5a    | 0.803 |
| Bcl11b   | Hap1     | 0.803 |
| Id3      | Hsp90aa1 | 0.803 |
| Cd2ap    | Gtf2e1   | 0.803 |
| Ngly1    | Vcp      | 0.803 |
| Psm5     | Krt8     | 0.803 |
| Psm5     | Rhoa     | 0.803 |
| Psm4     | Hdac6    | 0.803 |
| Rac1     | Pla2g4a  | 0.803 |
| Usp2     | Stat1    | 0.803 |
| Usp2     | Myod1    | 0.803 |
| Lmn2     | Ttn      | 0.803 |
| Traip    | Traf3ip2 | 0.803 |
| Hist2h4  | Pdcd6    | 0.803 |
| Pura     | Tceb2    | 0.803 |
| Ccdc101  | Kat2a    | 0.803 |
| Ccdc101  | Fasn     | 0.803 |
| Lcp2     | Blk      | 0.803 |
| Lmx1b    | Ssbp4    | 0.803 |
| Tcf12    | Zdhhc15  | 0.803 |
| Tcf12    | Taf15    | 0.803 |
| Slc11a1  | Cyld     | 0.803 |
| Cops2    | Thrb     | 0.803 |
| Prlr     | Stat5a   | 0.803 |
| Efs      | Prkaca   | 0.803 |
| Esr1     | Clybl    | 0.803 |
| Esr1     | Gab1     | 0.803 |
| Mtf2     | Snai3    | 0.803 |
| Zfp236   | Ppargc1a | 0.803 |
| Ndel1    | Ppp1r9b  | 0.803 |
| Egr2     | Rnf115   | 0.803 |
| Adam10   | Cask     | 0.803 |

|          |        |       |
|----------|--------|-------|
| Foxn2    | Dlx5   | 0.803 |
| Magi2    | Ddx5   | 0.803 |
| Nbr1     | Hdac5  | 0.803 |
| Prkcb    | Fus    | 0.803 |
| Prkce    | Ilf1r1 | 0.803 |
| Prkce    | Ppp5c  | 0.803 |
| Bhlhe41  | Eif4a2 | 0.803 |
| Ube2i    | Sun1   | 0.803 |
| Ube2i    | Irf1   | 0.803 |
| Hbb-b1   | Syn1   | 0.803 |
| Hbb-b1   | Dclk2  | 0.803 |
| Cyld     | Rnf31  | 0.803 |
| Ankrd17  | Ipo9   | 0.803 |
| Akr1b3   | Mdh2   | 0.803 |
| Ubb      | Adam6b | 0.803 |
| Zfpm1    | Sip1   | 0.803 |
| Zfpm1    | Phf12  | 0.803 |
| Fancd2   | Dlg4   | 0.803 |
| Dbnl     | Syn1   | 0.803 |
| Dynll1   | Tfrc   | 0.803 |
| Eif4a1   | Cyca   | 0.803 |
| Eif4a1   | Zfp292 | 0.803 |
| Eif4a1   | Rpsa   | 0.803 |
| Eif4ebp1 | Vrk3   | 0.803 |
| Eef1a1   | Rps13  | 0.803 |
| Smad2    | Lef1   | 0.803 |
| Snpc4    | Srebf1 | 0.803 |
| Hba-a1   | Prdm16 | 0.803 |
| Smc1a    | Pds5a  | 0.803 |
| Rps13    | Cand1  | 0.803 |
| Rps13    | Eprs   | 0.803 |
| Ppia     | Kdm5b  | 0.803 |
| Arrb2    | Hipk1  | 0.803 |
| Zfp277   | Sirt2  | 0.803 |
| Rpl7     | Prkcsh | 0.803 |
| Top2a    | Rab5a  | 0.803 |
| Casp8    | Mpl    | 0.803 |
| Lef1     | Sox8   | 0.803 |
| Nrip1    | Prdx5  | 0.803 |
| Shc1     | Met    | 0.802 |
| Sorbs1   | Crk    | 0.802 |
| Pik3r1   | Dok1   | 0.802 |
| Epc1     | Ring1  | 0.802 |
| Rarg     | Bcl11b | 0.802 |
| Esrrb    | Rnf2   | 0.802 |
| Stk38    | Ezh2   | 0.802 |



|          |          |       |
|----------|----------|-------|
| Tnfrsf1a | Ripk1    | 0.802 |
| Cul1     | Skp2     | 0.802 |
| Rnh1     | Nucb1    | 0.802 |
| Rnh1     | Tuba1a   | 0.802 |
| Bcl11b   | Sap18    | 0.802 |
| Actbl2   | Eno1     | 0.802 |
| Id3      | Id1      | 0.802 |
| Irf8     | Fam175b  | 0.802 |
| Pias4    | Srebf1   | 0.802 |
| Raf1     | Dlg4     | 0.802 |
| Psmb5    | Sun2     | 0.802 |
| Psmb5    | Ulk1     | 0.802 |
| Psmb5    | Dlg1     | 0.802 |
| Psmb4    | Adrbk1   | 0.802 |
| Psmb4    | Csf1r    | 0.802 |
| Invs     | Ahi1     | 0.802 |
| Eif3b    | Ap2m1    | 0.802 |
| Sod1     | Uimc1    | 0.802 |
| Pcp2     | Gnao1    | 0.802 |
| Vangl2   | Dvl3     | 0.802 |
| Crk      | Arhgap33 | 0.802 |
| Traf6    | Nphp4    | 0.802 |
| Traf6    | Nfkbia   | 0.802 |
| Traf6    | Sh3gl2   | 0.802 |
| Rab3d    | Nhlrc1   | 0.802 |
| Rai14    | Polr3f   | 0.802 |
| Tle1     | Ppia     | 0.802 |
| Gjb6     | Smad5    | 0.802 |
| Hnf1a    | Ppargc1a | 0.802 |
| Naglu    | Tatdn2   | 0.802 |
| Orc2l    | Zfp111   | 0.802 |
| Ush1c    | Plekha1  | 0.802 |
| Ccnd1    | Rb1      | 0.802 |
| Ptpn11   | Gab1     | 0.802 |
| Nphp3    | Krt15    | 0.802 |
| Tctn1    | Krt15    | 0.802 |
| Tctn1    | Tubb5    | 0.802 |
| Malt1    | Card10   | 0.802 |
| Nbr1     | Vav1     | 0.802 |
| Prkca    | Prkce    | 0.802 |
| Prkcd    | Mapk6    | 0.802 |
| Prkcd    | Casp8    | 0.802 |
| Prkce    | Reg1     | 0.802 |
| Prkce    | Ppp2ca   | 0.802 |
| Hsf1     | Srebf1   | 0.802 |
| Aldoa    | Eef2     | 0.802 |

|         |         |       |
|---------|---------|-------|
| Nfkb1   | Relb    | 0.802 |
| Sf3b2   | Smad3   | 0.802 |
| Pparg   | Vcp     | 0.802 |
| Zfp110  | Ticam1  | 0.802 |
| Uba52   | Cfl1    | 0.802 |
| Uba52   | Fbln2   | 0.802 |
| Fancd2  | Tsg101  | 0.802 |
| Fancd2  | Mpl     | 0.802 |
| Fancd2  | Cdkn1a  | 0.802 |
| Fancd2  | Fos     | 0.802 |
| Dbnl    | Usp8    | 0.802 |
| Eif4a1  | Psmc5   | 0.802 |
| Eef1a1  | Mib2    | 0.802 |
| Rbx1    | Fbxo6   | 0.802 |
| Ssbp4   | Lhx9    | 0.802 |
| Smad5   | Psmc3   | 0.802 |
| Spry3   | Spry1   | 0.802 |
| Angptl2 | Huwe1   | 0.802 |
| Rps13   | Tceb1   | 0.802 |
| Ifrd1   | Sp3     | 0.802 |
| Zfp277  | Asb1    | 0.802 |
| Mef2c   | Sap18   | 0.802 |
| Tbl1x   | Pin1    | 0.802 |
| Casp8   | Pcyt1a  | 0.802 |
| Bat1a   | Sh3gl2  | 0.802 |
| Fasn    | Ddx41   | 0.802 |
| Bag1    | Ctnnb1  | 0.801 |
| Ldlrap1 | Etv3    | 0.801 |
| Mecp2   | Ep300   | 0.801 |
| Mecp2   | Zfp82   | 0.801 |
| Tnfaip3 | Tax1bp1 | 0.801 |
| Shc3    | Nos1    | 0.801 |
| Psm4    | Psm2    | 0.801 |
| Psm4    | Psm6    | 0.801 |
| L3mbtl2 | Ewsr1   | 0.801 |
| Rad51   | Cd2ap   | 0.801 |
| Rad51   | Nr3c1   | 0.801 |
| Cited4  | Myod1   | 0.801 |
| Cited4  | Jarid2  | 0.801 |
| Cul1    | Fbxo2   | 0.801 |
| Bcl11b  | Nhlrc1  | 0.801 |
| Sgca    | Sgca    | 0.801 |
| Sin3b   | Ddx20   | 0.801 |
| Ubtf    | Rb1     | 0.801 |
| Id3     | Nupr1   | 0.801 |
| Cd2ap   | Rnps1   | 0.801 |

|            |         |       |
|------------|---------|-------|
| Cd2ap      | Egfr    | 0.801 |
| Psmb4      | Zfand2a | 0.801 |
| Psmb4      | Hspa8   | 0.801 |
| Psmb4      | Was     | 0.801 |
| Psmb4      | Fam175b | 0.801 |
| Psmb1      | Psm7    | 0.801 |
| Psmb1      | Kpnb1   | 0.801 |
| Psmb1      | Myh9    | 0.801 |
| Usp2       | Scnn1b  | 0.801 |
| Usp2       | Gata6   | 0.801 |
| Usp2       | Stub1   | 0.801 |
| Usp2       | Uchl1   | 0.801 |
| Hnrnpa2b1  | Anxa1   | 0.801 |
| Eif3b      | Pcbp1   | 0.801 |
| Sod1       | Krt73   | 0.801 |
| Sod1       | Tpi1    | 0.801 |
| Sod1       | Vcp     | 0.801 |
| Sod1       | Mpl     | 0.801 |
| Sod1       | Ube4b   | 0.801 |
| Gm5920     | Actr1a  | 0.801 |
| 2900073G15 | Grin1   | 0.801 |
| Traf6      | Nlr1    | 0.801 |
| Rab5b      | Cdc42   | 0.801 |
| Rab3d      | Foxp1   | 0.801 |
| Bub1       | H3f3a   | 0.801 |
| Rai14      | Hdac10  | 0.801 |
| Tcf12      | Eif4a1  | 0.801 |
| Hist1h1a   | Cdk4    | 0.801 |
| Naglu      | Tfrc    | 0.801 |
| Ccne1      | Cdk2    | 0.801 |
| Egfr       | Src     | 0.801 |
| Esr1       | Tle4    | 0.801 |
| Max        | Dnajb6  | 0.801 |
| Max        | Rps6ka3 | 0.801 |
| Ctnnd1     | Ctnnb1  | 0.801 |
| Ywhaz      | Aph1a   | 0.801 |
| Magi2      | Sf3b2   | 0.801 |
| Nbr1       | Fyn     | 0.801 |
| Ube2n      | Map3k7  | 0.801 |
| Ube2l3     | Sufu    | 0.801 |
| Hbb-b1     | Eif3e   | 0.801 |
| Cyld       | Map3k1  | 0.801 |
| Aldoa      | lkbkg   | 0.801 |
| Aldoa      | Wwp1    | 0.801 |
| Akr1b3     | Ldb3    | 0.801 |
| Rrp8       | Topbp1  | 0.801 |

|          |           |       |
|----------|-----------|-------|
| Ppargc1a | Nfya      | 0.801 |
| Ncoa6    | Cbx4      | 0.801 |
| Ppara    | Gfi1b     | 0.801 |
| Ubb      | Hoxb9     | 0.801 |
| Tek      | Grb2      | 0.801 |
| Fancd2   | Hsp90aa1  | 0.801 |
| Fancd2   | Psmc2     | 0.801 |
| Smarce1  | Tbx21     | 0.801 |
| Dbnl     | H2afx     | 0.801 |
| Dynll1   | Hspb1     | 0.801 |
| Eif4a1   | Zfp277    | 0.801 |
| Eif4a1   | Pdlim4    | 0.801 |
| Eef1a1   | Irf7      | 0.801 |
| Spry3    | Spry4     | 0.801 |
| Rela     | Hdac1     | 0.801 |
| Cdk2     | Trp53     | 0.801 |
| Ptma     | Fos       | 0.801 |
| Sf3b1    | Rorc      | 0.801 |
| Sf3b1    | E2f6      | 0.801 |
| Casp8    | Ube4b     | 0.801 |
| Casp9    | Myd88     | 0.801 |
| Bat1a    | Cdkn1a    | 0.801 |
| Fasn     | Mad2l1    | 0.801 |
| Gli3     | Hist1h2ai | 0.801 |
| Esrra    | Ppargc1a  | 0.8   |
| Tmem43   | Ptpn13    | 0.8   |
| Ap1b1    | Rps19bp1  | 0.8   |
| Ap1b1    | Gata3     | 0.8   |
| Mecp2    | Epc1      | 0.8   |
| Shc1     | Igf1r     | 0.8   |
| Shc1     | Ulk1      | 0.8   |
| Pik3r1   | Fyn       | 0.8   |
| Krt10    | Nphp1     | 0.8   |
| Gbbp1    | Taf1a     | 0.8   |
| Cited4   | Fos       | 0.8   |
| Esrrb    | Smarca4   | 0.8   |
| Lancl2   | Exoc4     | 0.8   |
| Bcl11b   | Epm2a     | 0.8   |
| Bcl11b   | Cox5a     | 0.8   |
| Bcl11b   | Ep300     | 0.8   |
| Actbl2   | Csnk2a2   | 0.8   |
| Tcf3     | Neurog2   | 0.8   |
| Id2      | Cdk9      | 0.8   |
| Id2      | Cebpb     | 0.8   |
| Psmc4    | Ipo9      | 0.8   |
| Psmc4    | Casp3     | 0.8   |

|         |         |     |
|---------|---------|-----|
| Sod1    | Casp3   | 0.8 |
| Sod1    | Hnrnpk  | 0.8 |
| Lmnb1   | Cbx3    | 0.8 |
| Lmnb1   | Nphp1   | 0.8 |
| Gm5920  | Frmd4b  | 0.8 |
| Ywhab   | Crk     | 0.8 |
| Pcp2    | Actn1   | 0.8 |
| Polk    | Smn1    | 0.8 |
| Traf6   | Dok3    | 0.8 |
| Ccnt1   | Mllt1   | 0.8 |
| Hnf1a   | Otx2    | 0.8 |
| Naglu   | Pi4ka   | 0.8 |
| Slc11a1 | Cbfb    | 0.8 |
| Nr2f6   | Gmeb1   | 0.8 |
| Tmsb4x  | Ilk     | 0.8 |
| Max     | Map2k7  | 0.8 |
| Mapt    | Pdcd6ip | 0.8 |
| Mapt    | Psmc3   | 0.8 |
| Ctnnd1  | Grin1   | 0.8 |
| Ndel1   | Eef1a2  | 0.8 |
| Birc3   | Nos2    | 0.8 |
| Mks1    | Krt78   | 0.8 |
| Prkcb   | Ppp3ca  | 0.8 |
| Bhlhe41 | Zfp292  | 0.8 |
| Cenpv   | Atp5d   | 0.8 |
| Ube2i   | Rnf14   | 0.8 |
| Cyld    | Atg16l1 | 0.8 |
| Akr1b3  | Telo2   | 0.8 |
| Tirap   | Tubb2c  | 0.8 |
| Ncoa6   | Csnk2b  | 0.8 |
| Ncoa6   | Ep400   | 0.8 |
| Zfp110  | Trim24  | 0.8 |
| Smarce1 | Ikbkg   | 0.8 |
| Syn2    | Arhgef6 | 0.8 |
| Map3k7  | Rnf31   | 0.8 |
| Eif4a1  | Gm5414  | 0.8 |
| Eef1a1  | Cycs    | 0.8 |
| Ctr9    | Ruvbl2  | 0.8 |
| Smad2   | Ctnn    | 0.8 |
| Tbrg1   | Iffo2   | 0.8 |
| Tbrg1   | Tyw1    | 0.8 |
| Casp8   | Runx2   | 0.8 |
| Fasn    | Lpxn    | 0.8 |
| Sp1     | Jun     | 0.8 |
