# Supplementary material for: Connectivity Homology Enables Inter-Species Network Models of Synthetic Lethality
Source: PubMed Central journal article supplement (PMC4599967; doi:10.1371/journal.pcbi.1004506), 2015-10-09
Supplement: pcbi.1004506.s021.pdf [file pcbi.1004506.s021.pdf]

| Gene 1 |          | Gene 2 |         | SINaTRA Score |
|--------|----------|--------|---------|---------------|
| ID     | Symbol   | ID     | Symbol  |               |
| 28998  | MRPL13   | 65080  | MRPL44  | 0.962         |
| 28998  | MRPL13   | 23256  | SCFD1   | 0.954         |
| 5983   | RFC3     | 5981   | RFC1    | 0.965         |
| 5983   | RFC3     | 5884   | RAD17   | 0.98          |
| 5983   | RFC3     | 23476  | BRD4    | 0.974         |
| 83540  | NUF2     | 11130  | ZWINT   | 0.968         |
| 273    | AMPH     | 10188  | TNK2    | 0.971         |
| 273    | AMPH     | 6453   | ITSN1   | 0.954         |
| 273    | AMPH     | 160    | AP2A1   | 0.951         |
| 273    | AMPH     | 50618  | ITSN2   | 0.953         |
| 273    | AMPH     | 1785   | DNM2    | 0.966         |
| 273    | AMPH     | 23523  | CABIN1  | 0.961         |
| 9525   | VPS4B    | 10534  | SSSCA1  | 0.968         |
| 9525   | VPS4B    | 9736   | USP34   | 0.957         |
| 9525   | VPS4B    | 7298   | TYMS    | 0.966         |
| 9525   | VPS4B    | 8882   | ZNF259  | 0.96          |
| 9525   | VPS4B    | 9559   | VPS26A  | 0.954         |
| 9525   | VPS4B    | 283237 | TTC9C   | 0.972         |
| 9525   | VPS4B    | 10277  | UBE4B   | 0.959         |
| 9527   | GOSR1    | 6811   | STX5    | 0.959         |
| 9252   | RPS6KA5  | 51776  | ZAK     | 0.956         |
| 84126  | ATRIP    | 11073  | TOPBP1  | 0.98          |
| 10892  | MALT1    | 84433  | CARD11  | 0.967         |
| 10892  | MALT1    | 5588   | PRKCQ   | 0.977         |
| 10892  | MALT1    | 9099   | USP2    | 0.979         |
| 22878  | KIAA1012 | 83696  | TRAPPC9 | 0.961         |
| 29763  | PACSIN3  | 7456   | WIPF1   | 0.982         |
| 29763  | PACSIN3  | 7454   | WAS     | 0.963         |
| 29763  | PACSIN3  | 6453   | ITSN1   | 0.966         |
| 29763  | PACSIN3  | 1785   | DNM2    | 0.968         |
| 23054  | NCOA6    | 9757   | MLL4    | 0.969         |
| 23054  | NCOA6    | 51586  | MED15   | 0.964         |
| 7185   | TRAF1    | 8717   | TRADD   | 0.96          |
| 7185   | TRAF1    | 8737   | RIPK1   | 0.957         |
| 7185   | TRAF1    | 55072  | RNF31   | 0.958         |
| 7185   | TRAF1    | 9020   | MAP3K14 | 0.952         |
| 7185   | TRAF1    | 8837   | CFLAR   | 0.951         |
| 7185   | TRAF1    | 10616  | RBCK1   | 0.95          |
| 7187   | TRAF3    | 8737   | RIPK1   | 0.957         |
| 7187   | TRAF3    | 4591   | TRIM37  | 0.962         |
| 7187   | TRAF3    | 4804   | NGFR    | 0.955         |
| 7187   | TRAF3    | 4615   | MYD88   | 0.95          |
| 7187   | TRAF3    | 868    | CBLB    | 0.962         |

|                |                |       |
|----------------|----------------|-------|
| 7187 TRAF3     | 10133 OPTN     | 0.954 |
| 7187 TRAF3     | 51567 TTRAP    | 0.955 |
| 7456 WIPF1     | 7454 WAS       | 0.951 |
| 7456 WIPF1     | 11252 PACSIN2  | 0.979 |
| 7454 WAS       | 3702 ITK       | 0.964 |
| 7453 WARS      | 158 ADSL       | 0.965 |
| 7453 WARS      | 56474 CTPS2    | 0.963 |
| 7453 WARS      | 9329 GTF3C4    | 0.964 |
| 7453 WARS      | 7511 XPNPEP1   | 0.975 |
| 65080 MRPL44   | 65005 MRPL9    | 0.976 |
| 65080 MRPL44   | 54534 MRPL50   | 0.967 |
| 65080 MRPL44   | 28977 MRPL42   | 0.958 |
| 65080 MRPL44   | 64975 MRPL41   | 0.956 |
| 65080 MRPL44   | 64978 MRPL38   | 0.962 |
| 55626 AMBRA1   | 1468 SLC25A10  | 0.956 |
| 55626 AMBRA1   | 57521 RPTOR    | 0.954 |
| 55626 AMBRA1   | 23192 ATG4B    | 0.95  |
| 55626 AMBRA1   | 8408 ULK1      | 0.965 |
| 2319 FLOT2     | 11160 ERLIN2   | 0.975 |
| 2319 FLOT2     | 10211 FLOT1    | 0.954 |
| 65260 C1orf163 | 57466 SFRS15   | 0.966 |
| 4729 NDUFV2    | 4728 NDUFS8    | 0.969 |
| 4729 NDUFV2    | 4720 NDUFS2    | 0.969 |
| 4729 NDUFV2    | 4722 NDUFS3    | 0.961 |
| 4729 NDUFV2    | 4723 NDUFV1    | 0.952 |
| 4726 NDUFS6    | 4720 NDUFS2    | 0.96  |
| 4720 NDUFS2    | 4722 NDUFS3    | 0.964 |
| 4720 NDUFS2    | 4723 NDUFV1    | 0.955 |
| 4722 NDUFS3    | 4723 NDUFV1    | 0.958 |
| 11284 PNKP     | 3980 LIG3      | 0.953 |
| 11284 PNKP     | 7518 XRCC4     | 0.95  |
| 51100 SH3GLB1  | 26128 KIAA1279 | 0.951 |
| 51100 SH3GLB1  | 3267 AGFG1     | 0.952 |
| 51100 SH3GLB1  | 5528 PPP2R5D   | 0.956 |
| 10392 NOD1     | 8767 RIPK2     | 0.957 |
| 10393 ANAPC10  | 11065 UBE2C    | 0.951 |
| 10393 ANAPC10  | 9232 PTTG1     | 0.97  |
| 10393 ANAPC10  | 10297 APC2     | 0.971 |
| 6810 STX4      | 6844 VAMP2     | 0.958 |
| 6810 STX4      | 8673 VAMP8     | 0.974 |
| 6810 STX4      | 9217 VAPB      | 0.966 |
| 6810 STX4      | 8773 SNAP23    | 0.976 |
| 6810 STX4      | 8775 NAPA      | 0.958 |
| 6817 SULT1A1   | 7169 TPM2      | 0.957 |
| 6817 SULT1A1   | 7320 UBE2B     | 0.95  |
| 6817 SULT1A1   | 7347 UCHL3     | 0.952 |

|              |               |       |
|--------------|---------------|-------|
| 6817 SULT1A1 | 146691 TOM1L2 | 0.952 |
| 6817 SULT1A1 | 7171 TPM4     | 0.95  |
| 6817 SULT1A1 | 11075 STMN2   | 0.95  |
| 9757 MLL4    | 9070 ASH2L    | 0.95  |
| 8848 TSC22D1 | 4091 SMAD6    | 0.966 |
| 8915 BCL10   | 7132 TNFRSF1A | 0.953 |
| 1762 DMWD    | 23239 PHLPP1  | 0.953 |
| 58533 SNX6   | 3020 H3F3A    | 0.954 |
| 58533 SNX6   | 5074 PAWR     | 0.988 |
| 58533 SNX6   | 10533 ATG7    | 0.979 |
| 58533 SNX6   | 327 APEH      | 0.975 |
| 58533 SNX6   | 6470 SHMT1    | 0.981 |
| 58533 SNX6   | 6642 SNX1     | 0.967 |
| 58533 SNX6   | 8723 SNX4     | 0.956 |
| 58533 SNX6   | 81611 ANP32E  | 0.95  |
| 58533 SNX6   | 55737 VPS35   | 0.955 |
| 58533 SNX6   | 64855 FAM129B | 0.957 |
| 58533 SNX6   | 51699 VPS29   | 0.961 |
| 8717 TRADD   | 7124 TNF      | 0.958 |
| 8717 TRADD   | 355 FAS       | 0.967 |
| 8717 TRADD   | 7133 TNFRSF1B | 0.965 |
| 79705 LRRK1  | 3635 INPP5D   | 0.965 |
| 79705 LRRK1  | 6654 SOS1     | 0.97  |
| 79705 LRRK1  | 613 BCR       | 0.956 |
| 9520 NPEPPS  | 6197 RPS6KA3  | 0.965 |
| 6778 STAT6   | 8648 NCOA1    | 0.958 |
| 6774 STAT3   | 960 CD44      | 0.951 |
| 6776 STAT5A  | 2057 EPOR     | 0.963 |
| 6777 STAT5B  | 3643 INSR     | 0.967 |
| 6777 STAT5B  | 58490 RPRD1B  | 0.963 |
| 9968 MED12   | 7067 THRA     | 0.957 |
| 9968 MED12   | 80306 MED28   | 0.955 |
| 9969 MED13   | 79991 OBFC1   | 0.95  |
| 9969 MED13   | 9325 TRIP4    | 0.976 |
| 9969 MED13   | 9444 QKI      | 0.95  |
| 3891 KRT85   | 9101 USP8     | 0.968 |
| 84108 PCGF6  | 23269 MGA     | 0.964 |
| 84108 PCGF6  | 7027 TFDP1    | 0.957 |
| 84108 PCGF6  | 1876 E2F6     | 0.958 |
| 64928 MRPL14 | 51069 MRPL2   | 0.954 |
| 22818 COPZ1  | 1729 DIAPH1   | 0.951 |
| 22818 COPZ1  | 3831 KLC1     | 0.961 |
| 22818 COPZ1  | 26958 COPG2   | 0.959 |
| 22818 COPZ1  | 7090 TLE3     | 0.961 |
| 112939 NACC1 | 54880 BCOR    | 0.956 |
| 10188 TNK2   | 9564 BCAR1    | 0.979 |

|                |                |       |
|----------------|----------------|-------|
| 10188 TNK2     | 6478 SIAH2     | 0.951 |
| 10188 TNK2     | 7525 YES1      | 0.957 |
| 10188 TNK2     | 5159 PDGFRB    | 0.969 |
| 1155 TBCB      | 23071 ERP44    | 0.971 |
| 1155 TBCB      | 4643 MYO1E     | 0.951 |
| 23071 ERP44    | 10979 FERMT2   | 0.969 |
| 23071 ERP44    | 5062 PAK2      | 0.971 |
| 23071 ERP44    | 11235 PDCD10   | 0.962 |
| 23071 ERP44    | 5198 PFAS      | 0.953 |
| 112869 CCDC101 | 51562 MBIP     | 0.959 |
| 29127 RACGAP1  | 23164 MPRIP    | 0.969 |
| 29127 RACGAP1  | 9493 KIF23     | 0.957 |
| 8520 HAT1      | 8314 BAP1      | 0.97  |
| 4299 AFF1      | 4297 MLL       | 0.981 |
| 4299 AFF1      | 10614 HEXIM1   | 0.979 |
| 4299 AFF1      | 23476 BRD4     | 0.97  |
| 4299 AFF1      | 904 CCNT1      | 0.969 |
| 4297 MLL       | 904 CCNT1      | 0.965 |
| 4297 MLL       | 9070 ASH2L     | 0.953 |
| 4296 MAP3K11   | 6416 MAP2K4    | 0.955 |
| 4296 MAP3K11   | 5609 MAP2K7    | 0.964 |
| 23380 SRGAP2   | 55763 EXOC1    | 0.954 |
| 81567 TXNDC5   | 9689 BZW1      | 0.951 |
| 55644 OSGEP    | 7165 TPD52L2   | 0.971 |
| 55644 OSGEP    | 26128 KIAA1279 | 0.95  |
| 55644 OSGEP    | 8882 ZNF259    | 0.973 |
| 55644 OSGEP    | 51002 TPRKB    | 0.975 |
| 55644 OSGEP    | 573 BAG1       | 0.95  |
| 55644 OSGEP    | 58490 RPRD1B   | 0.957 |
| 55644 OSGEP    | 60491 NIF3L1   | 0.965 |
| 55644 OSGEP    | 8270 LAGE3     | 0.971 |
| 55644 OSGEP    | 64175 LEPRE1   | 0.965 |
| 55644 OSGEP    | 26136 TES      | 0.972 |
| 55644 OSGEP    | 51569 UFM1     | 0.965 |
| 55644 OSGEP    | 10055 SAE1     | 0.953 |
| 5867 RAB4A     | 79874 RABEP2   | 0.964 |
| 5861 RAB1A     | 4860 PNP       | 0.958 |
| 5861 RAB1A     | 8766 RAB11A    | 0.95  |
| 5861 RAB1A     | 136319 MTPN    | 0.956 |
| 5861 RAB1A     | 7879 RAB7A     | 0.964 |
| 5861 RAB1A     | 9230 RAB11B    | 0.971 |
| 5861 RAB1A     | 523 ATP6V1A    | 0.959 |
| 5861 RAB1A     | 2665 GDI2      | 0.978 |
| 2186 BPTF      | 6594 SMARCA1   | 0.954 |
| 2189 FANCG     | 675 BRCA2      | 0.967 |
| 57646 USP28    | 8314 BAP1      | 0.959 |

|                |              |       |
|----------------|--------------|-------|
| 57646 USP28    | 64219 PJA1   | 0.951 |
| 57646 USP28    | 8078 USP5    | 0.954 |
| 57646 USP28    | 23032 USP33  | 0.986 |
| 57646 USP28    | 7347 UCHL3   | 0.967 |
| 57646 USP28    | 8027 STAM    | 0.959 |
| 57646 USP28    | 9101 USP8    | 0.966 |
| 57646 USP28    | 63967 CLSPN  | 0.954 |
| 159 ADSS       | 9948 WDR1    | 0.967 |
| 159 ADSS       | 3417 IDH1    | 0.964 |
| 159 ADSS       | 3336 HSPE1   | 0.968 |
| 159 ADSS       | 6888 TALDO1  | 0.958 |
| 159 ADSS       | 29082 CHMP4A | 0.956 |
| 159 ADSS       | 54108 CHRAC1 | 0.96  |
| 159 ADSS       | 5763 PTMS    | 0.975 |
| 159 ADSS       | 1633 DCK     | 0.976 |
| 158 ADSL       | 22978 NT5C2  | 0.962 |
| 158 ADSL       | 55666 NPLOC4 | 0.964 |
| 158 ADSL       | 10226 PLIN3  | 0.969 |
| 158 ADSL       | 8539 API5    | 0.97  |
| 158 ADSL       | 7511 XPNPEP1 | 0.96  |
| 158 ADSL       | 29978 UBQLN2 | 0.97  |
| 158 ADSL       | 10785 WDR4   | 0.966 |
| 158 ADSL       | 10055 SAE1   | 0.968 |
| 6900 CNTN2     | 4801 NFYB    | 0.97  |
| 9191 DEDD      | 8837 CFLAR   | 0.955 |
| 9191 DEDD      | 843 CASP10   | 0.951 |
| 6238 RRBP1     | 58477 SRPRB  | 0.966 |
| 6238 RRBP1     | 10084 PQBP1  | 0.962 |
| 6238 RRBP1     | 5937 RBMS1   | 0.973 |
| 6238 RRBP1     | 4701 NDUFA7  | 0.957 |
| 91 ACVR1B      | 4091 SMAD6   | 0.965 |
| 8861 LDB1      | 51592 TRIM33 | 0.966 |
| 8861 LDB1      | 6886 TAL1    | 0.961 |
| 811 CALR       | 6455 SH3GL1  | 0.954 |
| 813 CALU       | 51194 IPO11  | 0.952 |
| 813 CALU       | 10094 ARPC3  | 0.971 |
| 815 CAMK2A     | 5071 PARK2   | 0.959 |
| 57132 CHMP1B   | 51510 CHMP5  | 0.965 |
| 11130 ZWINT    | 79003 MIS12  | 0.952 |
| 11130 ZWINT    | 79980 DSN1   | 0.964 |
| 11130 ZWINT    | 10403 NDC80  | 0.972 |
| 3020 H3F3A     | 10951 CBX1   | 0.95  |
| 3020 H3F3A     | 55723 ASF1B  | 0.95  |
| 55726 C12orf11 | 26173 INTS1  | 0.956 |
| 8737 RIPK1     | 7188 TRAF5   | 0.971 |
| 8737 RIPK1     | 7128 TNFAIP3 | 0.956 |

|                |                |       |
|----------------|----------------|-------|
| 8737 RIPK1     | 7124 TNF       | 0.957 |
| 8737 RIPK1     | 1540 CYLD      | 0.964 |
| 8737 RIPK1     | 331 XIAP       | 0.953 |
| 8737 RIPK1     | 355 FAS        | 0.979 |
| 8737 RIPK1     | 64127 NOD2     | 0.969 |
| 8737 RIPK1     | 8837 CFLAR     | 0.963 |
| 8737 RIPK1     | 8767 RIPK2     | 0.959 |
| 8737 RIPK1     | 8887 TAX1BP1   | 0.967 |
| 8737 RIPK1     | 843 CASP10     | 0.978 |
| 8737 RIPK1     | 841 CASP8      | 0.955 |
| 8737 RIPK1     | 26133 TRPC4AP  | 0.962 |
| 8737 RIPK1     | 148022 TICAM1  | 0.968 |
| 8737 RIPK1     | 7132 TNFRSF1A  | 0.957 |
| 8737 RIPK1     | 329 BIRC2      | 0.964 |
| 8737 RIPK1     | 10616 RBCK1    | 0.974 |
| 8737 RIPK1     | 10133 OPTN     | 0.983 |
| 8737 RIPK1     | 7335 UBE2V1    | 0.96  |
| 8737 RIPK1     | 11035 RIPK3    | 0.98  |
| 8737 RIPK1     | 8795 TNFRSF10B | 0.951 |
| 8737 RIPK1     | 23118 TAB2     | 0.959 |
| 8737 RIPK1     | 9099 USP2      | 0.974 |
| 8737 RIPK1     | 8772 FADD      | 0.959 |
| 4199 ME1       | 6904 TBCD      | 0.951 |
| 4199 ME1       | 7358 UGDH      | 0.963 |
| 55120 FANCL    | 2176 FANCC     | 0.962 |
| 55120 FANCL    | 2177 FANCD2    | 0.95  |
| 55120 FANCL    | 3280 HES1      | 0.963 |
| 23244 PDS5A    | 23063 WAPAL    | 0.97  |
| 23244 PDS5A    | 10274 STAG1    | 0.97  |
| 27005 USP21    | 57787 MARK4    | 0.959 |
| 27005 USP21    | 23032 USP33    | 0.968 |
| 27005 USP21    | 2011 MARK2     | 0.968 |
| 27005 USP21    | 7347 UCHL3     | 0.956 |
| 27005 USP21    | 10616 RBCK1    | 0.973 |
| 27005 USP21    | 57159 TRIM54   | 0.955 |
| 27005 USP21    | 9099 USP2      | 0.977 |
| 9948 WDR1      | 3336 HSPE1     | 0.957 |
| 9948 WDR1      | 5763 PTMS      | 0.955 |
| 9948 WDR1      | 4830 NME1      | 0.97  |
| 56474 CTPS2    | 10226 PLIN3    | 0.959 |
| 57787 MARK4    | 2011 MARK2     | 0.955 |
| 57787 MARK4    | 50855 PARD6A   | 0.967 |
| 140576 S100A16 | 9217 VAPB      | 0.97  |
| 140576 S100A16 | 8803 SUCLA2    | 0.961 |
| 5074 PAWR      | 327 APEH       | 0.967 |
| 5074 PAWR      | 6470 SHMT1     | 0.968 |

|              |               |       |
|--------------|---------------|-------|
| 5074 PAWR    | 833 CARS      | 0.972 |
| 5074 PAWR    | 6643 SNX2     | 0.966 |
| 5074 PAWR    | 5496 PPM1G    | 0.959 |
| 5074 PAWR    | 51699 VPS29   | 0.964 |
| 9564 BCAR1   | 5829 PXN      | 0.953 |
| 9564 BCAR1   | 3932 LCK      | 0.974 |
| 9564 BCAR1   | 5782 PTPN12   | 0.955 |
| 9564 BCAR1   | 4867 NPHP1    | 0.952 |
| 9564 BCAR1   | 7205 TRIP6    | 0.951 |
| 9564 BCAR1   | 10525 HYOU1   | 0.954 |
| 9564 BCAR1   | 23607 CD2AP   | 0.957 |
| 9564 BCAR1   | 1399 CRKL     | 0.952 |
| 8500 PPFIA1  | 5802 PTPRS    | 0.961 |
| 8500 PPFIA1  | 5528 PPP2R5D  | 0.953 |
| 23013 SPEN   | 862 RUNX1T1   | 0.966 |
| 26524 LATS2  | 9113 LATS1    | 0.952 |
| 26524 LATS2  | 55233 MOBKL1B | 0.953 |
| 26524 LATS2  | 84962 JUB     | 0.964 |
| 26524 LATS2  | 6615 SNAI1    | 0.952 |
| 11160 ERLIN2 | 7353 UFD1L    | 0.962 |
| 11160 ERLIN2 | 3638 INSIG1   | 0.969 |
| 11160 ERLIN2 | 79139 DERL1   | 0.963 |
| 11160 ERLIN2 | 84447 SYVN1   | 0.953 |
| 7188 TRAF5   | 4591 TRIM37   | 0.956 |
| 7188 TRAF5   | 63893 UBE2O   | 0.968 |
| 7188 TRAF5   | 9020 MAP3K14  | 0.962 |
| 7188 TRAF5   | 4804 NGFR     | 0.95  |
| 7188 TRAF5   | 148022 TICAM1 | 0.975 |
| 7188 TRAF5   | 51567 TTRAP   | 0.965 |
| 7188 TRAF5   | 10293 TRAI    | 0.959 |
| 56647 BCCIP  | 8942 KYNU     | 0.96  |
| 56647 BCCIP  | 55577 NAGK    | 0.955 |
| 79991 OBFC1  | 9440 MED17    | 0.95  |
| 79991 OBFC1  | 9442 MED27    | 0.97  |
| 79991 OBFC1  | 10025 MED16   | 0.955 |
| 79991 OBFC1  | 10001 MED6    | 0.959 |
| 79991 OBFC1  | 9439 MED23    | 0.96  |
| 51147 ING4   | 79960 PHF17   | 0.964 |
| 51147 ING4   | 64769 MEAF6   | 0.96  |
| 6258 RXRG    | 84962 JUB     | 0.96  |
| 10533 ATG7   | 27430 MAT2B   | 0.953 |
| 10533 ATG7   | 6642 SNX1     | 0.953 |
| 10533 ATG7   | 64422 ATG3    | 0.968 |
| 10533 ATG7   | 6904 TBCD     | 0.956 |
| 10534 SSSCA1 | 10460 TACC3   | 0.962 |
| 10534 SSSCA1 | 29978 UBQLN2  | 0.968 |

|              |               |       |
|--------------|---------------|-------|
| 10539 GLRX3  | 3417 IDH1     | 0.971 |
| 10539 GLRX3  | 79180 EFHD2   | 0.95  |
| 3476 IGBP1   | 25824 PRDX5   | 0.954 |
| 835 CASP2    | 637 BID       | 0.971 |
| 835 CASP2    | 843 CASP10    | 0.967 |
| 835 CASP2    | 841 CASP8     | 0.954 |
| 835 CASP2    | 840 CASP7     | 0.969 |
| 8881 CDC16   | 51592 TRIM33  | 0.95  |
| 8881 CDC16   | 4085 MAD2L1   | 0.959 |
| 8881 CDC16   | 26271 FBXO5   | 0.959 |
| 8881 CDC16   | 10297 APC2    | 0.952 |
| 8883 NAE1    | 5910 RAP1GDS1 | 0.966 |
| 8883 NAE1    | 5049 PAFAH1B2 | 0.964 |
| 8883 NAE1    | 5504 PPP1R2   | 0.977 |
| 80854 SETD7  | 6879 TAF7     | 0.973 |
| 80854 SETD7  | 6878 TAF6     | 0.972 |
| 1729 DIAPH1  | 3831 KLC1     | 0.967 |
| 9459 ARHGEF6 | 7046 TGFBR1   | 0.953 |
| 9459 ARHGEF6 | 8874 ARHGEF7  | 0.972 |
| 55339 WDR33  | 81608 FIP1L1  | 0.95  |
| 6416 MAP2K4  | 5608 MAP2K6   | 0.952 |
| 6416 MAP2K4  | 5601 MAPK9    | 0.966 |
| 6416 MAP2K4  | 5602 MAPK10   | 0.963 |
| 6416 MAP2K4  | 5609 MAP2K7   | 0.969 |
| 8315 BRAP    | 3265 HRAS     | 0.98  |
| 8315 BRAP    | 5604 MAP2K1   | 0.988 |
| 8315 BRAP    | 7375 USP4     | 0.952 |
| 8315 BRAP    | 673 BRAF      | 0.953 |
| 8312 AXIN1   | 1855 DVL1     | 0.96  |
| 6738 TROVE2  | 7360 UGP2     | 0.955 |
| 8318 CDC45L  | 23594 ORC6L   | 0.958 |
| 8318 CDC45L  | 23595 ORC3L   | 0.972 |
| 8318 CDC45L  | 5001 ORC5L    | 0.973 |
| 8318 CDC45L  | 55388 MCM10   | 0.972 |
| 9929 JOSD1   | 57159 TRIM54  | 0.955 |
| 215 ABCD1    | 5825 ABCD3    | 0.958 |
| 327 APEH     | 6470 SHMT1    | 0.952 |
| 327 APEH     | 833 CARS      | 0.956 |
| 327 APEH     | 22824 HSPA4L  | 0.956 |
| 327 APEH     | 10059 DNMT1L  | 0.974 |
| 3643 INSR    | 10451 VAV3    | 0.966 |
| 3643 INSR    | 9021 SOCS3    | 0.975 |
| 3643 INSR    | 8660 IRS2     | 0.958 |
| 3643 INSR    | 8651 SOCS1    | 0.971 |
| 2551 GABPA   | 6670 SP3      | 0.978 |
| 64969 MRPS5  | 60488 MRPS35  | 0.951 |



|              |                |       |
|--------------|----------------|-------|
| 915 CD3D     | 79139 DERL1    | 0.959 |
| 64219 PJA1   | 7347 UCHL3     | 0.954 |
| 7169 TPM2    | 7170 TPM3      | 0.952 |
| 7163 TPD52   | 7165 TPD52L2   | 0.98  |
| 7165 TPD52L2 | 4234 METTL1    | 0.964 |
| 7165 TPD52L2 | 5202 PFDN2     | 0.966 |
| 7165 TPD52L2 | 80755 AARSD1   | 0.975 |
| 7165 TPD52L2 | 51194 IPO11    | 0.967 |
| 7165 TPD52L2 | 5528 PPP2R5D   | 0.986 |
| 7165 TPD52L2 | 10096 ACTR3    | 0.955 |
| 7165 TPD52L2 | 29978 UBQLN2   | 0.969 |
| 7165 TPD52L2 | 10055 SAE1     | 0.956 |
| 7165 TPD52L2 | 10552 ARPC1A   | 0.969 |
| 8078 USP5    | 523 ATP6V1A    | 0.95  |
| 637 BID      | 5599 MAPK8     | 0.952 |
| 637 BID      | 598 BCL2L1     | 0.952 |
| 637 BID      | 355 FAS        | 0.968 |
| 637 BID      | 836 CASP3      | 0.956 |
| 637 BID      | 843 CASP10     | 0.952 |
| 637 BID      | 841 CASP8      | 0.953 |
| 637 BID      | 7132 TNFRSF1A  | 0.959 |
| 637 BID      | 4170 MCL1      | 0.958 |
| 637 BID      | 8795 TNFRSF10B | 0.959 |
| 637 BID      | 8772 FADD      | 0.969 |
| 3996 LLGL1   | 5584 PRKCI     | 0.957 |
| 23032 USP33  | 9738 CP110     | 0.959 |
| 23032 USP33  | 84676 TRIM63   | 0.963 |
| 23032 USP33  | 57159 TRIM54   | 0.96  |
| 23032 USP33  | 84461 NEURL4   | 0.953 |
| 23644 EDC4   | 167227 DCP2    | 0.961 |
| 23644 EDC4   | 4836 NMT1      | 0.956 |
| 23133 PHF8   | 9070 ASH2L     | 0.962 |
| 5825 ABCD3   | 5824 PEX19     | 0.95  |
| 5825 ABCD3   | 53918 PELO     | 0.956 |
| 10452 TOMM40 | 56993 TOMM22   | 0.962 |
| 10452 TOMM40 | 51119 SBDS     | 0.952 |
| 196 AHR      | 2963 GTF2F2    | 0.958 |
| 10458 BAIAP2 | 2011 MARK2     | 0.96  |
| 10458 BAIAP2 | 3831 KLC1      | 0.955 |
| 10458 BAIAP2 | 89953 KLC4     | 0.966 |
| 10458 BAIAP2 | 5062 PAK2      | 0.957 |
| 10458 BAIAP2 | 501 ALDH7A1    | 0.957 |
| 10458 BAIAP2 | 10298 PAK4     | 0.952 |
| 10458 BAIAP2 | 995 CDC25C     | 0.976 |
| 10101 NUBP2  | 5721 PSME2     | 0.959 |
| 10101 NUBP2  | 5202 PFDN2     | 0.968 |

|             |               |       |
|-------------|---------------|-------|
| 10101 NUBP2 | 7320 UBE2B    | 0.95  |
| 10101 NUBP2 | 11344 TWF2    | 0.951 |
| 10101 NUBP2 | 10226 PLIN3   | 0.954 |
| 10101 NUBP2 | 11328 FKBP9   | 0.956 |
| 10101 NUBP2 | 55239 OGFOD1  | 0.958 |
| 10101 NUBP2 | 25824 PRDX5   | 0.955 |
| 10101 NUBP2 | 134492 NUDCD2 | 0.955 |
| 10101 NUBP2 | 8539 API5     | 0.951 |
| 10101 NUBP2 | 54926 UBE2R2  | 0.95  |
| 10101 NUBP2 | 7511 XPNPEP1  | 0.958 |
| 10101 NUBP2 | 29978 UBQLN2  | 0.955 |
| 10101 NUBP2 | 7336 UBE2V2   | 0.952 |
| 10101 NUBP2 | 9296 ATP6V1F  | 0.955 |
| 10101 NUBP2 | 11034 DSTN    | 0.966 |
| 10101 NUBP2 | 10802 SEC24A  | 0.951 |
| 10101 NUBP2 | 55236 UBA6    | 0.963 |
| 2768 GNA12  | 2931 GSK3A    | 0.961 |
| 9150 CTDP1  | 9325 TRIP4    | 0.96  |
| 9150 CTDP1  | 23476 BRD4    | 0.95  |
| 9736 USP34  | 29978 UBQLN2  | 0.958 |
| 9736 USP34  | 10802 SEC24A  | 0.95  |
| 9738 CP110  | 8924 HERC2    | 0.958 |
| 857 CAV1    | 355 FAS       | 0.952 |
| 857 CAV1    | 960 CD44      | 0.961 |
| 84759 PCGF1 | 23429 RYBP    | 0.955 |
| 5226 PGD    | 501 ALDH7A1   | 0.965 |
| 8900 CCNA1  | 51343 FZR1    | 0.953 |
| 54732 TMED9 | 9554 SEC22B   | 0.969 |
| 3069 HDLBP  | 51028 VPS36   | 0.962 |
| 26173 INTS1 | 5437 POLR2H   | 0.968 |
| 26173 INTS1 | 23613 ZMYND8  | 0.977 |
| 26173 INTS1 | 54973 CPSF3L  | 0.964 |
| 26173 INTS1 | 5519 PPP2R1B  | 0.95  |
| 26173 INTS1 | 55756 INTS9   | 0.955 |
| 6478 SIAH2  | 6497 SKI      | 0.971 |
| 6472 SHMT2  | 6642 SNX1     | 0.952 |
| 6470 SHMT1  | 833 CARS      | 0.965 |
| 6470 SHMT1  | 3035 HARS     | 0.955 |
| 6470 SHMT1  | 7265 TTC1     | 0.953 |
| 6470 SHMT1  | 51699 VPS29   | 0.966 |
| 6477 SIAH1  | 51132 RLIM    | 0.955 |
| 3665 IRF7   | 7128 TNFAIP3  | 0.954 |
| 3665 IRF7   | 8772 FADD     | 0.952 |
| 3667 IRS1   | 5336 PLCG2    | 0.953 |
| 3667 IRS1   | 5290 PIK3CA   | 0.969 |
| 3663 IRF5   | 2873 GPS1     | 0.957 |

|                |                |       |
|----------------|----------------|-------|
| 150684 COMMD1  | 5971 RELB      | 0.961 |
| 4437 MSH3      | 5883 RAD9A     | 0.984 |
| 4437 MSH3      | 5810 RAD1      | 0.98  |
| 4437 MSH3      | 5395 PMS2      | 0.986 |
| 4437 MSH3      | 84464 BTBD12   | 0.967 |
| 90390 MED30    | 5435 POLR2F    | 0.955 |
| 8085 MLL2      | 80335 WDR82    | 0.958 |
| 8085 MLL2      | 7403 KDM6A     | 0.952 |
| 8085 MLL2      | 9070 ASH2L     | 0.963 |
| 8924 HERC2     | 7337 UBE3A     | 0.953 |
| 57082 CASC5    | 10403 NDC80    | 0.954 |
| 4236 MFAP1     | 79753 SNIP1    | 0.971 |
| 4234 METTL1    | 55666 NPLOC4   | 0.962 |
| 4234 METTL1    | 1810 DR1       | 0.961 |
| 4234 METTL1    | 51194 IPO11    | 0.966 |
| 4233 MET       | 23624 CBLC     | 0.95  |
| 4233 MET       | 6654 SOS1      | 0.976 |
| 5590 PRKCZ     | 50855 PARD6A   | 0.953 |
| 317 APAF1      | 842 CASP9      | 0.979 |
| 11200 CHEK2    | 5527 PPP2R5C   | 0.95  |
| 65008 MRPL1    | 51073 MRPL4    | 0.957 |
| 65003 MRPL11   | 64978 MRPL38   | 0.963 |
| 65005 MRPL9    | 11222 MRPL3    | 0.963 |
| 65005 MRPL9    | 9801 MRPL19    | 0.953 |
| 65005 MRPL9    | 51069 MRPL2    | 0.985 |
| 27258 LSM3     | 25804 LSM4     | 0.95  |
| 27258 LSM3     | 11157 LSM6     | 0.966 |
| 8697 CDC23     | 56916 SMARCAD1 | 0.95  |
| 8697 CDC23     | 51592 TRIM33   | 0.95  |
| 8697 CDC23     | 11065 UBE2C    | 0.955 |
| 8697 CDC23     | 26271 FBXO5    | 0.968 |
| 10914 PAPOLA   | 10726 NUDC     | 0.96  |
| 10919 EHMT2    | 1788 DNMT3A    | 0.973 |
| 7703 PCGF2     | 1912 PHC2      | 0.956 |
| 7703 PCGF2     | 23429 RYBP     | 0.967 |
| 7703 PCGF2     | 10138 YAF2     | 0.967 |
| 26127 FGFR1OP2 | 85369 FAM40A   | 0.954 |
| 26127 FGFR1OP2 | 54764 ZRANB1   | 0.966 |
| 81855 SFXN3    | 94081 SFXN1    | 0.981 |
| 81857 MED25    | 7067 THRA      | 0.953 |
| 81857 MED25    | 80306 MED28    | 0.95  |
| 81858 SHARPIN  | 7124 TNF       | 0.954 |
| 81858 SHARPIN  | 64127 NOD2     | 0.953 |
| 81858 SHARPIN  | 10616 RBCK1    | 0.953 |
| 26128 KIAA1279 | 6455 SH3GL1    | 0.956 |
| 4591 TRIM37    | 4804 NGFR      | 0.953 |

|               |               |       |
|---------------|---------------|-------|
| 4591 TRIM37   | 9513 FXR2     | 0.957 |
| 4846 NOS3     | 2639 GCDH     | 0.952 |
| 5201 PFDN1    | 5202 PFDN2    | 0.964 |
| 5201 PFDN1    | 3035 HARS     | 0.952 |
| 5203 PFDN4    | 5202 PFDN2    | 0.96  |
| 5203 PFDN4    | 7411 VBP1     | 0.963 |
| 5202 PFDN2    | 5204 PFDN5    | 0.965 |
| 5202 PFDN2    | 5516 PPP2CB   | 0.958 |
| 5202 PFDN2    | 29978 UBQLN2  | 0.978 |
| 5202 PFDN2    | 7411 VBP1     | 0.968 |
| 5204 PFDN5    | 4659 PPP1R12A | 0.953 |
| 5204 PFDN5    | 7411 VBP1     | 0.957 |
| 6455 SH3GL1   | 573 BAG1      | 0.955 |
| 6455 SH3GL1   | 2960 GTF2E1   | 0.959 |
| 6455 SH3GL1   | 56904 SH3GLB2 | 0.973 |
| 91833 WDR20   | 23239 PHLPP1  | 0.962 |
| 91833 WDR20   | 64854 USP46   | 0.95  |
| 55090 MED9    | 5439 POLR2J   | 0.96  |
| 3956 LGALS1   | 8624 PSMG1    | 0.963 |
| 8353 HIST1H3E | 5252 PHF1     | 0.97  |
| 8353 HIST1H3E | 8208 CHAF1B   | 0.97  |
| 8353 HIST1H3E | 55723 ASF1B   | 0.959 |
| 5782 PTPN12   | 7360 UGP2     | 0.962 |
| 116985 ARAP1  | 3635 INPP5D   | 0.971 |
| 85369 FAM40A  | 54764 ZRANB1  | 0.962 |
| 85363 TRIM5   | 4331 MNAT1    | 0.957 |
| 85363 TRIM5   | 7681 MKRN3    | 0.95  |
| 85363 TRIM5   | 7336 UBE2V2   | 0.975 |
| 85363 TRIM5   | 7335 UBE2V1   | 0.95  |
| 85363 TRIM5   | 22954 TRIM32  | 0.961 |
| 85363 TRIM5   | 9099 USP2     | 0.963 |
| 6338 SCNN1B   | 10053 AP1M2   | 0.961 |
| 55666 NPLOC4  | 10611 PDLIM5  | 0.954 |
| 55666 NPLOC4  | 10226 PLIN3   | 0.953 |
| 55666 NPLOC4  | 55197 RPRD1A  | 0.957 |
| 55666 NPLOC4  | 10785 WDR4    | 0.952 |
| 10451 VAV3    | 5159 PDGFRB   | 0.962 |
| 23049 SMG1    | 2935 GSPT1    | 0.965 |
| 152006 RNF38  | 9666 DZIP3    | 0.953 |
| 152006 RNF38  | 55905 RNF114  | 0.954 |
| 7124 TNF      | 355 FAS       | 0.955 |
| 7124 TNF      | 55072 RNF31   | 0.966 |
| 7124 TNF      | 7133 TNFRSF1B | 0.976 |
| 7124 TNF      | 10616 RBCK1   | 0.955 |
| 7124 TNF      | 10133 OPTN    | 0.952 |
| 7124 TNF      | 10318 TNIP1   | 0.972 |

|               |                |       |
|---------------|----------------|-------|
| 598 BCL2L1    | 578 BAK1       | 0.954 |
| 598 BCL2L1    | 7159 TP53BP2   | 0.963 |
| 4215 MAP3K3   | 2011 MARK2     | 0.952 |
| 4216 MAP3K4   | 9618 TRAF4     | 0.957 |
| 4216 MAP3K4   | 5609 MAP2K7    | 0.957 |
| 4218 RAB8A    | 6342 SCP2      | 0.968 |
| 4218 RAB8A    | 9230 RAB11B    | 0.965 |
| 171568 POLR3H | 51082 POLR1D   | 0.95  |
| 1540 CYLD     | 8975 USP13     | 0.951 |
| 5573 PRKAR1A  | 11215 AKAP11   | 0.952 |
| 3265 HRAS     | 5604 MAP2K1    | 0.951 |
| 3265 HRAS     | 9610 RIN1      | 0.955 |
| 3265 HRAS     | 5290 PIK3CA    | 0.966 |
| 79590 MRPL24  | 51069 MRPL2    | 0.952 |
| 79590 MRPL24  | 84311 MRPL45   | 0.966 |
| 79590 MRPL24  | 64976 MRPL40   | 0.961 |
| 79590 MRPL24  | 51253 MRPL37   | 0.953 |
| 79590 MRPL24  | 51073 MRPL4    | 0.955 |
| 331 XIAP      | 332 BIRC5      | 0.954 |
| 330 BIRC3     | 332 BIRC5      | 0.968 |
| 330 BIRC3     | 55072 RNF31    | 0.955 |
| 330 BIRC3     | 842 CASP9      | 0.954 |
| 330 BIRC3     | 9666 DZIP3     | 0.961 |
| 330 BIRC3     | 7132 TNFRSF1A  | 0.953 |
| 330 BIRC3     | 27429 HTRA2    | 0.95  |
| 332 BIRC5     | 842 CASP9      | 0.985 |
| 332 BIRC5     | 56616 DIABLO   | 0.952 |
| 332 BIRC5     | 3619 INCENP    | 0.972 |
| 332 BIRC5     | 55143 CDCA8    | 0.981 |
| 11222 MRPL3   | 28977 MRPL42   | 0.966 |
| 11222 MRPL3   | 51073 MRPL4    | 0.965 |
| 11222 MRPL3   | 124995 MRPL10  | 0.958 |
| 51343 FZR1    | 9232 PTTG1     | 0.956 |
| 51433 ANAPC5  | 56916 SMARCAD1 | 0.952 |
| 51433 ANAPC5  | 51592 TRIM33   | 0.954 |
| 51433 ANAPC5  | 11065 UBE2C    | 0.956 |
| 51433 ANAPC5  | 26271 FBXO5    | 0.95  |
| 10938 EHD1    | 8539 API5      | 0.955 |
| 9443 MED7     | 6720 SREBF1    | 0.96  |
| 9443 MED7     | 80306 MED28    | 0.976 |
| 9443 MED7     | 6837 MED22     | 0.959 |
| 9440 MED17    | 9325 TRIP4     | 0.954 |
| 8882 ZNF259   | 7336 UBE2V2    | 0.958 |
| 8882 ZNF259   | 51569 UFM1     | 0.951 |
| 81876 RAB1B   | 9230 RAB11B    | 0.951 |
| 2011 MARK2    | 4140 MARK3     | 0.956 |

|              |               |       |
|--------------|---------------|-------|
| 2011 MARK2   | 50855 PARD6A  | 0.982 |
| 2011 MARK2   | 51564 HDAC7   | 0.969 |
| 10592 SMC2   | 9918 NCAPD2   | 0.957 |
| 10592 SMC2   | 64151 NCAPG   | 0.955 |
| 54700 RRN3   | 84172 POLR1B  | 0.96  |
| 27430 MAT2B  | 6642 SNX1     | 0.963 |
| 7015 TERT    | 10445 MCRC1   | 0.95  |
| 9113 LATS1   | 11186 RASSF1  | 0.966 |
| 9112 MTA1    | 4331 MNAT1    | 0.953 |
| 9442 MED27   | 9325 TRIP4    | 0.955 |
| 55636 CHD7   | 55193 PBRM1   | 0.955 |
| 6925 TCF4    | 6886 TAL1     | 0.969 |
| 6925 TCF4    | 3397 ID1      | 0.953 |
| 6925 TCF4    | 3399 ID3      | 0.955 |
| 28957 MRPS28 | 28977 MRPL42  | 0.954 |
| 28957 MRPS28 | 64975 MRPL41  | 0.951 |
| 28957 MRPS28 | 4701 NDUFA7   | 0.953 |
| 4005 LMO2    | 6886 TAL1     | 0.96  |
| 3417 IDH1    | 2805 GOT1     | 0.953 |
| 3417 IDH1    | 79180 EFHD2   | 0.951 |
| 3417 IDH1    | 3336 HSPE1    | 0.954 |
| 3417 IDH1    | 6888 TALDO1   | 0.956 |
| 3417 IDH1    | 5763 PTMS     | 0.973 |
| 3417 IDH1    | 4830 NME1     | 0.965 |
| 578 BAK1     | 581 BAX       | 0.974 |
| 578 BAK1     | 4170 MCL1     | 0.952 |
| 29945 ANAPC4 | 4085 MAD2L1   | 0.956 |
| 29945 ANAPC4 | 26271 FBXO5   | 0.953 |
| 571 BACH1    | 11073 TOPBP1  | 0.97  |
| 571 BACH1    | 7975 MAFK     | 0.95  |
| 571 BACH1    | 4097 MAFG     | 0.968 |
| 571 BACH1    | 675 BRCA2     | 0.971 |
| 2801 GOLGA2  | 64689 GORASP1 | 0.959 |
| 5436 POLR2G  | 9400 RECQL5   | 0.97  |
| 5436 POLR2G  | 2963 GTF2F2   | 0.959 |
| 5436 POLR2G  | 26512 INTS6   | 0.953 |
| 5436 POLR2G  | 80306 MED28   | 0.97  |
| 5436 POLR2G  | 65123 INTS3   | 0.952 |
| 5437 POLR2H  | 661 POLR3D    | 0.957 |
| 5437 POLR2H  | 2963 GTF2F2   | 0.962 |
| 5437 POLR2H  | 25885 POLR1A  | 0.977 |
| 5437 POLR2H  | 2959 GTF2B    | 0.959 |
| 5437 POLR2H  | 1788 DNMT3A   | 0.975 |
| 5434 POLR2E  | 2963 GTF2F2   | 0.951 |
| 5434 POLR2E  | 2959 GTF2B    | 0.95  |
| 5439 POLR2J  | 80306 MED28   | 0.959 |

|               |                 |       |
|---------------|-----------------|-------|
| 58477 SRPRB   | 10084 PQBP1     | 0.955 |
| 58477 SRPRB   | 5937 RBMS1      | 0.964 |
| 58477 SRPRB   | 51119 SBDS      | 0.957 |
| 58477 SRPRB   | 9997 SCO2       | 0.955 |
| 197131 UBR1   | 523 ATP6V1A     | 0.953 |
| 5883 RAD9A    | 5884 RAD17      | 0.967 |
| 5883 RAD9A    | 11073 TOPBP1    | 0.97  |
| 5883 RAD9A    | 7266 DNAJC7     | 0.95  |
| 5883 RAD9A    | 63967 CLSPN     | 0.97  |
| 23186 RCOR1   | 6886 TAL1       | 0.958 |
| 23186 RCOR1   | 5978 REST       | 0.985 |
| 23186 RCOR1   | 57504 MTA3      | 0.959 |
| 23186 RCOR1   | 6615 SNAI1      | 0.973 |
| 23633 KPNA6   | 3839 KPNA3      | 0.956 |
| 25929 GEMIN5  | 6726 SRP9       | 0.95  |
| 355 FAS       | 8837 CFLAR      | 0.965 |
| 355 FAS       | 843 CASP10      | 0.96  |
| 355 FAS       | 7132 TNFRSF1A   | 0.954 |
| 355 FAS       | 8772 FADD       | 0.959 |
| 11073 TOPBP1  | 5395 PMS2       | 0.974 |
| 7508 XPC      | 2965 GTF2H1     | 0.957 |
| 10952 SEC61B  | 439 ASNA1       | 0.971 |
| 10952 SEC61B  | 29927 SEC61A1   | 0.961 |
| 10952 SEC61B  | 6449 SGTA       | 0.95  |
| 10956 OS9     | 51465 UBE2J1    | 0.963 |
| 4800 NFYA     | 4801 NFYB       | 0.972 |
| 4800 NFYA     | 22926 ATF6      | 0.962 |
| 4802 NFYC     | 6878 TAF6       | 0.952 |
| 2072 ERCC4    | 2067 ERCC1      | 0.955 |
| 2072 ERCC4    | 84464 BTBD12    | 0.966 |
| 8975 USP13    | 7353 UFD1L      | 0.951 |
| 84661 DPY30   | 9070 ASH2L      | 0.95  |
| 6497 SKI      | 4204 MECP2      | 0.961 |
| 51013 EXOSC1  | 118460 EXOSC6   | 0.952 |
| 79657 RPAP3   | 50855 PARD6A    | 0.955 |
| 28977 MRPL42  | 51253 MRPL37    | 0.96  |
| 28973 MRPS18B | 60488 MRPS35    | 0.952 |
| 4026 LPP      | 51002 TPRKB     | 0.968 |
| 4026 LPP      | 3267 AGFG1      | 0.95  |
| 4026 LPP      | 51194 IPO11     | 0.951 |
| 4026 LPP      | 5528 PPP2R5D    | 0.967 |
| 4026 LPP      | 10055 SAE1      | 0.956 |
| 55763 EXOC1   | 667 DST         | 0.958 |
| 55763 EXOC1   | 60412 EXOC4     | 0.959 |
| 55763 EXOC1   | 284058 KIAA1267 | 0.95  |
| 51069 MRPL2   | 64976 MRPL40    | 0.956 |

|                |               |       |
|----------------|---------------|-------|
| 51069 MRPL2    | 51253 MRPL37  | 0.96  |
| 51069 MRPL2    | 6150 MRPL23   | 0.961 |
| 51608 C7orf20  | 1478 CSTF2    | 0.97  |
| 55588 MED29    | 2963 GTF2F2   | 0.952 |
| 55588 MED29    | 80306 MED28   | 0.951 |
| 57187 THOC2    | 55854 ZC3H15  | 0.962 |
| 9328 GTF3C5    | 9329 GTF3C4   | 0.96  |
| 9328 GTF3C5    | 10623 POLR3C  | 0.981 |
| 9328 GTF3C5    | 9330 GTF3C3   | 0.963 |
| 9328 GTF3C5    | 2976 GTF3C2   | 0.968 |
| 9329 GTF3C4    | 10623 POLR3C  | 0.962 |
| 9329 GTF3C4    | 9330 GTF3C3   | 0.965 |
| 9329 GTF3C4    | 3098 HK1      | 0.954 |
| 9329 GTF3C4    | 7511 XPNPEP1  | 0.972 |
| 9329 GTF3C4    | 30844 EHD4    | 0.963 |
| 9329 GTF3C4    | 2976 GTF3C2   | 0.956 |
| 26973 CHORDC1  | 55577 NAGK    | 0.954 |
| 550 AUP1       | 6400 SEL1L    | 0.952 |
| 550 AUP1       | 1650 DDOST    | 0.979 |
| 550 AUP1       | 51465 UBE2J1  | 0.976 |
| 550 AUP1       | 84447 SYVN1   | 0.962 |
| 79003 MIS12    | 10403 NDC80   | 0.956 |
| 5530 PPP3CA    | 4898 NRD1     | 0.96  |
| 5530 PPP3CA    | 64175 LEPRE1  | 0.958 |
| 5530 PPP3CA    | 7411 VBP1     | 0.951 |
| 5537 PPP6C     | 23243 ANKRD28 | 0.968 |
| 5536 PPP5C     | 5910 RAP1GDS1 | 0.952 |
| 5536 PPP5C     | 5049 PAFAH1B2 | 0.966 |
| 5536 PPP5C     | 64785 GINS3   | 0.964 |
| 5536 PPP5C     | 1676 DFFA     | 0.958 |
| 5536 PPP5C     | 2937 GSS      | 0.966 |
| 23613 ZMYND8   | 65123 INTS3   | 0.954 |
| 51479 ANKFY1   | 6093 ROCK1    | 0.968 |
| 3831 KLC1      | 89953 KLC4    | 0.962 |
| 3831 KLC1      | 372 ARCN1     | 0.95  |
| 3831 KLC1      | 7090 TLE3     | 0.952 |
| 10979 FERMT2   | 1676 DFFA     | 0.968 |
| 10979 FERMT2   | 501 ALDH7A1   | 0.967 |
| 56916 SMARCAD1 | 55929 DMAP1   | 0.952 |
| 2057 EPOR      | 8660 IRS2     | 0.952 |
| 2057 EPOR      | 3635 INPP5D   | 0.957 |
| 2057 EPOR      | 1399 CRKL     | 0.954 |
| 9402 GRAP2     | 11184 MAP4K1  | 0.954 |
| 9400 RECQL5    | 5433 POLR2D   | 0.952 |
| 10621 POLR3F   | 10623 POLR3C  | 0.977 |
| 7325 UBE2E2    | 7681 MKRN3    | 0.956 |



|              |              |       |
|--------------|--------------|-------|
| 7320 UBE2B   | 9296 ATP6V1F | 0.95  |
| 7320 UBE2B   | 10802 SEC24A | 0.953 |
| 10084 PQBP1  | 5937 RBMS1   | 0.959 |
| 10084 PQBP1  | 7419 VDAC3   | 0.953 |
| 10084 PQBP1  | 9997 SCO2    | 0.958 |
| 10084 PQBP1  | 9877 ZC3H11A | 0.964 |
| 10084 PQBP1  | 4701 NDUFA7  | 0.961 |
| 7067 THRA    | 10025 MED16  | 0.951 |
| 7067 THRA    | 2874 GPS2    | 0.973 |
| 7064 THOP1   | 309 ANXA6    | 0.951 |
| 7064 THOP1   | 1633 DCK     | 0.972 |
| 8624 PSMG1   | 84262 PSMG3  | 0.959 |
| 9984 THOC1   | 84321 THOC3  | 0.951 |
| 51592 TRIM33 | 64682 ANAPC1 | 0.95  |
| 9616 RNF7    | 51619 UBE2D4 | 0.951 |
| 9616 RNF7    | 7681 MKRN3   | 0.977 |
| 9616 RNF7    | 997 CDC34    | 0.96  |
| 9341 VAMP3   | 8673 VAMP8   | 0.968 |
| 9611 NCOR1   | 2959 GTF2B   | 0.952 |
| 9611 NCOR1   | 6878 TAF6    | 0.95  |
| 9618 TRAF4   | 7041 TGFB1I1 | 0.97  |
| 9618 TRAF4   | 8767 RIPK2   | 0.965 |
| 1810 DR1     | 51194 IPO11  | 0.958 |
| 1810 DR1     | 51562 MBIP   | 0.96  |
| 7290 HIRA    | 23523 CABIN1 | 0.973 |
| 26958 COPG2  | 11316 COPE   | 0.956 |
| 23075 SWAP70 | 10606 PAICS  | 0.959 |
| 23075 SWAP70 | 5007 OSBP    | 0.95  |
| 23075 SWAP70 | 5527 PPP2R5C | 0.965 |
| 1601 DAB2    | 160 AP2A1    | 0.962 |
| 5479 PPIB    | 5937 RBMS1   | 0.986 |
| 5479 PPIB    | 57794 SF4    | 0.982 |
| 5479 PPIB    | 10469 TIMM44 | 0.979 |
| 5479 PPIB    | 9877 ZC3H11A | 0.976 |
| 9894 TELO2   | 80230 RUFY1  | 0.959 |
| 9894 TELO2   | 55011 PIH1D1 | 0.953 |
| 55705 IPO9   | 23534 TNPO3  | 0.958 |
| 51082 POLR1D | 84172 POLR1B | 0.961 |
| 51082 POLR1D | 25885 POLR1A | 0.956 |
| 5519 PPP2R1B | 11235 PDCD10 | 0.955 |
| 5519 PPP2R1B | 5528 PPP2R5D | 0.976 |
| 5511 PPP1R8  | 8726 EED     | 0.963 |
| 5516 PPP2CB  | 5528 PPP2R5D | 0.968 |
| 3035 HARS    | 60528 ELAC2  | 0.957 |
| 3035 HARS    | 57510 XPO5   | 0.952 |
| 3035 HARS    | 7265 TTC1    | 0.953 |

|                 |              |       |
|-----------------|--------------|-------|
| 3035 HARS       | 64746 ACBD3  | 0.951 |
| 3815 KIT        | 7006 TEC     | 0.964 |
| 3815 KIT        | 868 CBLB     | 0.965 |
| 9425 CDYL       | 5978 REST    | 0.965 |
| 5289 PIK3C3     | 30849 PIK3R4 | 0.974 |
| 5289 PIK3C3     | 8678 BECN1   | 0.959 |
| 9021 SOCS3      | 7852 CXCR4   | 0.961 |
| 9282 MED14      | 23476 BRD4   | 0.964 |
| 9282 MED14      | 9444 QKI     | 0.956 |
| 7046 TGFBR1     | 960 CD44     | 0.954 |
| 23708 GSPT2     | 5962 RDX     | 0.969 |
| 23708 GSPT2     | 2935 GSPT1   | 0.958 |
| 11344 TWF2      | 55239 OGFOD1 | 0.97  |
| 11344 TWF2      | 824 CAPN2    | 0.982 |
| 11344 TWF2      | 830 CAPZA2   | 0.953 |
| 11344 TWF2      | 3098 HK1     | 0.965 |
| 11344 TWF2      | 440 ASNS     | 0.962 |
| 11344 TWF2      | 9601 PDIA4   | 0.966 |
| 11345 GABARAPL2 | 64422 ATG3   | 0.955 |
| 11345 GABARAPL2 | 23192 ATG4B  | 0.957 |
| 11345 GABARAPL2 | 8408 ULK1    | 0.958 |
| 51024 FIS1      | 10059 DNM1L  | 0.951 |
| 64127 NOD2      | 55072 RNF31  | 0.973 |
| 64127 NOD2      | 329 BIRC2    | 0.96  |
| 64127 NOD2      | 10616 RBCK1  | 0.977 |
| 9361 LONP1      | 22983 MAST1  | 0.951 |
| 9361 LONP1      | 24138 IFIT5  | 0.957 |
| 1831 TSC22D3    | 6446 SGK1    | 0.961 |
| 10611 PDLIM5    | 51194 IPO11  | 0.952 |
| 57037 ANKMY2    | 10226 PLIN3  | 0.965 |
| 57037 ANKMY2    | 55197 RPRD1A | 0.954 |
| 10614 HEXIM1    | 23476 BRD4   | 0.979 |
| 10614 HEXIM1    | 904 CCNT1    | 0.97  |
| 29924 EPN1      | 160 AP2A1    | 0.972 |
| 29924 EPN1      | 30846 EHD2   | 0.953 |
| 29924 EPN1      | 10053 AP1M2  | 0.95  |
| 23658 LSM5      | 11157 LSM6   | 0.968 |
| 8473 OGT        | 23640 HSPBP1 | 0.95  |
| 8473 OGT        | 10785 WDR4   | 0.953 |
| 55201 MAP1S     | 83593 RASSF5 | 0.953 |
| 2237 FEN1       | 60528 ELAC2  | 0.958 |
| 5937 RBMS1      | 8417 STX7    | 0.979 |
| 5937 RBMS1      | 51119 SBDS   | 0.963 |
| 5937 RBMS1      | 8724 SNX3    | 0.963 |
| 5937 RBMS1      | 10469 TIMM44 | 0.97  |
| 5937 RBMS1      | 6342 SCP2    | 0.979 |

|             |               |       |
|-------------|---------------|-------|
| 5937 RBMS1  | 9877 ZC3H11A  | 0.972 |
| 8125 ANP32A | 10226 PLIN3   | 0.963 |
| 23595 ORC3L | 5001 ORC5L    | 0.967 |
| 23595 ORC3L | 55388 MCM10   | 0.966 |
| 7360 UGP2   | 7791 ZYX      | 0.954 |
| 7360 UGP2   | 11252 PACSIN2 | 0.971 |
| 7360 UGP2   | 10726 NUDC    | 0.962 |
| 7027 TFDP1  | 1876 E2F6     | 0.961 |
| 7027 TFDP1  | 23429 RYBP    | 0.963 |
| 10226 PLIN3 | 55197 RPRD1A  | 0.968 |
| 10226 PLIN3 | 6726 SRP9     | 0.957 |
| 10226 PLIN3 | 51194 IPO11   | 0.969 |
| 10226 PLIN3 | 10785 WDR4    | 0.963 |
| 7791 ZYX    | 26136 TES     | 0.954 |
| 79184 BRCC3 | 9043 SPAG9    | 0.955 |
| 79184 BRCC3 | 675 BRCA2     | 0.955 |
| 8660 IRS2   | 5290 PIK3CA   | 0.954 |
| 8660 IRS2   | 8651 SOCS1    | 0.951 |
| 11328 FKBP9 | 8539 API5     | 0.962 |
| 11328 FKBP9 | 11235 PDCD10  | 0.956 |
| 11328 FKBP9 | 8994 LIMD1    | 0.952 |
| 11328 FKBP9 | 55236 UBA6    | 0.958 |
| 11328 FKBP9 | 55148 UBR7    | 0.952 |
| 55072 RNF31 | 8767 RIPK2    | 0.967 |
| 55072 RNF31 | 7706 TRIM25   | 0.969 |
| 55072 RNF31 | 10616 RBCK1   | 0.952 |
| 51009 DERL2 | 51465 UBE2J1  | 0.961 |
| 51009 DERL2 | 84447 SYVN1   | 0.956 |
| 51002 TPRKB | 3267 AGFG1    | 0.962 |
| 51002 TPRKB | 51194 IPO11   | 0.953 |
| 51002 TPRKB | 10092 ARPC5   | 0.961 |
| 8089 YEATS4 | 3015 H2AFZ    | 0.961 |
| 8089 YEATS4 | 54556 ING3    | 0.95  |
| 8089 YEATS4 | 55929 DMAP1   | 0.967 |
| 6642 SNX1   | 7358 UGDH     | 0.956 |
| 6643 SNX2   | 5962 RDX      | 0.954 |
| 6643 SNX2   | 2935 GSPT1    | 0.952 |
| 6643 SNX2   | 5159 PDGFRB   | 0.956 |
| 57697 FANCM | 2176 FANCC    | 0.95  |
| 1855 DVL1   | 1857 DVL3     | 0.953 |
| 1855 DVL1   | 1453 CSNK1D   | 0.95  |
| 2176 FANCC  | 3280 HES1     | 0.951 |
| 5433 POLR2D | 80306 MED28   | 0.957 |
| 5433 POLR2D | 65123 INTS3   | 0.951 |
| 84296 GINS4 | 64785 GINS3   | 0.956 |
| 3267 AGFG1  | 51056 LAP3    | 0.956 |

|               |               |       |
|---------------|---------------|-------|
| 3267 AGFG1    | 64175 LEPRE1  | 0.955 |
| 6886 TAL1     | 861 RUNX1     | 0.955 |
| 6886 TAL1     | 6304 SATB1    | 0.953 |
| 6884 TAF13    | 51616 TAF9B   | 0.961 |
| 6884 TAF13    | 6878 TAF6     | 0.969 |
| 6884 TAF13    | 6872 TAF1     | 0.972 |
| 6888 TALDO1   | 1633 DCK      | 0.959 |
| 602 BCL3      | 5971 RELB     | 0.954 |
| 468 ATF4      | 2959 GTF2B    | 0.954 |
| 468 ATF4      | 3726 JUNB     | 0.955 |
| 8417 STX7     | 51119 SBDS    | 0.968 |
| 8417 STX7     | 57794 SF4     | 0.963 |
| 8417 STX7     | 8724 SNX3     | 0.972 |
| 8417 STX7     | 4905 NSF      | 0.98  |
| 8417 STX7     | 55573 CDV3    | 0.955 |
| 8417 STX7     | 9997 SCO2     | 0.979 |
| 8417 STX7     | 6342 SCP2     | 0.967 |
| 8417 STX7     | 8673 VAMP8    | 0.975 |
| 8417 STX7     | 4701 NDUFA7   | 0.969 |
| 4140 MARK3    | 51564 HDAC7   | 0.96  |
| 4140 MARK3    | 995 CDC25C    | 0.975 |
| 55239 OGFOD1  | 55236 UBA6    | 0.96  |
| 5910 RAP1GDS1 | 1892 ECHS1    | 0.959 |
| 5910 RAP1GDS1 | 5049 PAFAH1B2 | 0.958 |
| 5910 RAP1GDS1 | 5504 PPP1R2   | 0.957 |
| 5910 RAP1GDS1 | 5198 PFAS     | 0.952 |
| 5910 RAP1GDS1 | 29789 OLA1    | 0.963 |
| 64682 ANAPC1  | 9232 PTTG1    | 0.959 |
| 57599 WDR48   | 23239 PHLPP1  | 0.958 |
| 64425 POLR1E  | 25885 POLR1A  | 0.95  |
| 64422 ATG3    | 9140 ATG12    | 0.97  |
| 64422 ATG3    | 445 ASS1      | 0.969 |
| 64422 ATG3    | 9474 ATG5     | 0.965 |
| 64422 ATG3    | 23192 ATG4B   | 0.96  |
| 2617 GARS     | 7358 UGDH     | 0.965 |
| 7347 UCHL3    | 7335 UBE2V1   | 0.95  |
| 7347 UCHL3    | 9296 ATP6V1F  | 0.954 |
| 7347 UCHL3    | 55236 UBA6    | 0.959 |
| 7347 UCHL3    | 57159 TRIM54  | 0.959 |
| 29082 CHMP4A  | 1633 DCK      | 0.953 |
| 29082 CHMP4A  | 27183 VPS4A   | 0.951 |
| 9020 MAP3K14  | 8837 CFLAR    | 0.966 |
| 9020 MAP3K14  | 4791 NFKB2    | 0.969 |
| 9020 MAP3K14  | 843 CASP10    | 0.967 |
| 29882 ANAPC2  | 27338 UBE2S   | 0.956 |
| 29883 CNOT7   | 8317 CDC7     | 0.957 |

|               |               |       |
|---------------|---------------|-------|
| 29888 STRN4   | 29115 SAP30BP | 0.95  |
| 29888 STRN4   | 5527 PPP2R5C  | 0.957 |
| 23637 RABGAP1 | 7879 RAB7A    | 0.951 |
| 1052 CEBPD    | 51176 LEF1    | 0.966 |
| 1052 CEBPD    | 2623 GATA1    | 0.953 |
| 1052 CEBPD    | 3726 JUNB     | 0.954 |
| 1054 CEBPG    | 8061 FOSL1    | 0.966 |
| 1054 CEBPG    | 3726 JUNB     | 0.973 |
| 5358 PLS3     | 5763 PTMS     | 0.957 |
| 5358 PLS3     | 4830 NME1     | 0.958 |
| 5358 PLS3     | 1633 DCK      | 0.96  |
| 11047 ADRM1   | 10422 UBAC1   | 0.956 |
| 54108 CHRAC1  | 5763 PTMS     | 0.968 |
| 8648 NCOA1    | 9325 TRIP4    | 0.964 |
| 8648 NCOA1    | 2959 GTF2B    | 0.96  |
| 8649 MAPKSP1  | 56993 TOMM22  | 0.962 |
| 8649 MAPKSP1  | 5604 MAP2K1   | 0.975 |
| 1876 E2F6     | 23429 RYBP    | 0.976 |
| 1874 E2F4     | 9070 ASH2L    | 0.956 |
| 10499 NCOA2   | 8856 NR1I2    | 0.955 |
| 57819 LSM2    | 8449 DHX16    | 0.955 |
| 10018 BCL2L11 | 4170 MCL1     | 0.959 |
| 661 POLR3D    | 10623 POLR3C  | 0.955 |
| 9821 RB1CC1   | 8408 ULK1     | 0.957 |
| 23168 RTF1    | 6917 TCEA1    | 0.972 |
| 23168 RTF1    | 1788 DNMT3A   | 0.966 |
| 23168 RTF1    | 80349 WDR61   | 0.982 |
| 5978 REST     | 23309 SIN3B   | 0.953 |
| 5971 RELB     | 5977 DPF2     | 0.954 |
| 10951 CBX1    | 9557 CHD1L    | 0.971 |
| 10951 CBX1    | 4204 MECP2    | 0.961 |
| 10951 CBX1    | 1788 DNMT3A   | 0.979 |
| 84171 LOXL4   | 10053 AP1M2   | 0.955 |
| 84172 POLR1B  | 25885 POLR1A  | 0.98  |
| 84311 MRPL45  | 64978 MRPL38  | 0.95  |
| 84311 MRPL45  | 51253 MRPL37  | 0.961 |
| 84313 VPS25   | 51028 VPS36   | 0.972 |
| 2965 GTF2H1   | 4331 MNAT1    | 0.962 |
| 2965 GTF2H1   | 6917 TCEA1    | 0.958 |
| 2965 GTF2H1   | 2068 ERCC2    | 0.951 |
| 2961 GTF2E2   | 2963 GTF2F2   | 0.962 |
| 2960 GTF2E1   | 6917 TCEA1    | 0.95  |
| 2960 GTF2E1   | 6301 SARS     | 0.952 |
| 2960 GTF2E1   | 56904 SH3GLB2 | 0.953 |
| 2963 GTF2F2   | 6917 TCEA1    | 0.96  |
| 2962 GTF2F1   | 6872 TAF1     | 0.956 |

|               |               |       |
|---------------|---------------|-------|
| 4331 MNAT1    | 2071 ERCC3    | 0.957 |
| 4331 MNAT1    | 56658 TRIM39  | 0.956 |
| 4331 MNAT1    | 7681 MKRN3    | 0.953 |
| 4331 MNAT1    | 9099 USP2     | 0.971 |
| 5763 PTMS     | 1633 DCK      | 0.971 |
| 5184 PEPD     | 8942 KYNU     | 0.973 |
| 5184 PEPD     | 445 ASS1      | 0.959 |
| 5184 PEPD     | 840 CASP7     | 0.971 |
| 5184 PEPD     | 9615 GDA      | 0.964 |
| 5184 PEPD     | 5476 CTSA     | 0.972 |
| 5184 PEPD     | 10072 DPP3    | 0.963 |
| 5184 PEPD     | 2936 GSR      | 0.974 |
| 6602 SMARCD1  | 6603 SMARCD2  | 0.968 |
| 6602 SMARCD1  | 29117 BRD7    | 0.952 |
| 6602 SMARCD1  | 2623 GATA1    | 0.974 |
| 6603 SMARCD2  | 9031 BAZ1B    | 0.959 |
| 1892 ECHS1    | 64785 GINS3   | 0.954 |
| 1892 ECHS1    | 5198 PFAS     | 0.951 |
| 1892 ECHS1    | 2937 GSS      | 0.972 |
| 4928 NUP98    | 8480 RAE1     | 0.963 |
| 5162 PDHB     | 1737 DLAT     | 0.976 |
| 80335 WDR82   | 9070 ASH2L    | 0.966 |
| 80335 WDR82   | 11091 WDR5    | 0.954 |
| 84433 CARD11  | 5588 PRKCQ    | 0.968 |
| 84433 CARD11  | 9099 USP2     | 0.976 |
| 6844 VAMP2    | 9554 SEC22B   | 0.962 |
| 6844 VAMP2    | 8673 VAMP8    | 0.954 |
| 6844 VAMP2    | 9217 VAPB     | 0.966 |
| 6844 VAMP2    | 8773 SNAP23   | 0.957 |
| 648 BMI1      | 10336 PCGF3   | 0.951 |
| 9646 CTR9     | 6917 TCEA1    | 0.952 |
| 9646 CTR9     | 80349 WDR61   | 0.963 |
| 10746 MAP3K2  | 5609 MAP2K7   | 0.958 |
| 79101 TAF1D   | 25885 POLR1A  | 0.96  |
| 4659 PPP1R12A | 64175 LEPRE1  | 0.954 |
| 51119 SBDS    | 8724 SNX3     | 0.961 |
| 51119 SBDS    | 10469 TIMM44  | 0.954 |
| 51119 SBDS    | 9997 SCO2     | 0.956 |
| 51119 SBDS    | 10277 UBE4B   | 0.959 |
| 8837 CFLAR    | 8767 RIPK2    | 0.957 |
| 8837 CFLAR    | 8772 FADD     | 0.956 |
| 1759 DNM1     | 11252 PACSIN2 | 0.952 |
| 8767 RIPK2    | 7132 TNFRSF1A | 0.958 |
| 8767 RIPK2    | 23118 TAB2    | 0.956 |
| 8766 RAB11A   | 7879 RAB7A    | 0.962 |
| 8766 RAB11A   | 9230 RAB11B   | 0.954 |

|               |        |                |       |       |
|---------------|--------|----------------|-------|-------|
| 8766 RAB11A   |        | 2665 GDI2      |       | 0.952 |
| 55752         | 11-Sep | 10801          | 9-Sep | 0.951 |
| 80755 AARSD1  |        | 6119 RPA3      |       | 0.96  |
| 80755 AARSD1  |        | 56904 SH3GLB2  |       | 0.965 |
| 8539 API5     |        | 7511 XPNPEP1   |       | 0.973 |
| 8027 STAM     |        | 9146 HGS       |       | 0.957 |
| 8027 STAM     |        | 9101 USP8      |       | 0.953 |
| 8027 STAM     |        | 407 ARR3       |       | 0.953 |
| 8027 STAM     |        | 29978 UBQLN2   |       | 0.954 |
| 8027 STAM     |        | 11075 STMN2    |       | 0.955 |
| 51135 IRAK4   |        | 114609 TIRAP   |       | 0.957 |
| 162 AP1B1     |        | 9685 CLINT1    |       | 0.967 |
| 163 AP2B1     |        | 9685 CLINT1    |       | 0.951 |
| 10363 HMG20A  |        | 57504 MTA3     |       | 0.963 |
| 57504 MTA3    |        | 23199 KIAA0182 |       | 0.981 |
| 57504 MTA3    |        | 57459 GATAD2B  |       | 0.981 |
| 64746 ACBD3   |        | 6301 SARS      |       | 0.955 |
| 64746 ACBD3   |        | 11267 SNF8     |       | 0.965 |
| 64746 ACBD3   |        | 51028 VPS36    |       | 0.953 |
| 64746 ACBD3   |        | 26003 GORASP2  |       | 0.958 |
| 5605 MAP2K2   |        | 5604 MAP2K1    |       | 0.965 |
| 5605 MAP2K2   |        | 673 BRAF       |       | 0.961 |
| 5604 MAP2K1   |        | 369 ARAF       |       | 0.972 |
| 5604 MAP2K1   |        | 673 BRAF       |       | 0.959 |
| 5604 MAP2K1   |        | 65125 WNK1     |       | 0.975 |
| 5601 MAPK9    |        | 5609 MAP2K7    |       | 0.98  |
| 9632 SEC24C   |        | 10802 SEC24A   |       | 0.954 |
| 9325 TRIP4    |        | 29079 MED4     |       | 0.962 |
| 9325 TRIP4    |        | 9439 MED23     |       | 0.973 |
| 9325 TRIP4    |        | 51586 MED15    |       | 0.968 |
| 9325 TRIP4    |        | 80306 MED28    |       | 0.96  |
| 8942 KYNU     |        | 55577 NAGK     |       | 0.984 |
| 8942 KYNU     |        | 10944 C11orf58 |       | 0.982 |
| 8942 KYNU     |        | 6611 SMS       |       | 0.99  |
| 8942 KYNU     |        | 2936 GSR       |       | 0.987 |
| 23256 SCFD1   |        | 64976 MRPL40   |       | 0.966 |
| 23256 SCFD1   |        | 4905 NSF       |       | 0.966 |
| 23256 SCFD1   |        | 8773 SNAP23    |       | 0.972 |
| 57794 SF4     |        | 8724 SNX3      |       | 0.95  |
| 57794 SF4     |        | 9877 ZC3H11A   |       | 0.962 |
| 5049 PAFAH1B2 |        | 2937 GSS       |       | 0.955 |
| 89953 KLC4    |        | 64837 KLC2     |       | 0.951 |
| 23062 GGA2    |        | 3482 IGF2R     |       | 0.952 |
| 23063 WAPAL   |        | 10274 STAG1    |       | 0.972 |
| 29966 STRN3   |        | 5524 PPP2R4    |       | 0.956 |
| 55658 RNF126  |        | 373 TRIM23     |       | 0.96  |

|               |                |       |
|---------------|----------------|-------|
| 56658 TRIM39  | 9099 USP2      | 0.956 |
| 4613 MYCN     | 4914 NTRK1     | 0.955 |
| 10523 CHERP   | 1659 DHX8      | 0.956 |
| 824 CAPN2     | 3098 HK1       | 0.975 |
| 824 CAPN2     | 9601 PDIA4     | 0.955 |
| 826 CAPNS1    | 4643 MYO1E     | 0.955 |
| 5252 PHF1     | 8726 EED       | 0.963 |
| 5252 PHF1     | 3090 HIC1      | 0.958 |
| 11127 KIF3A   | 22920 KIFAP3   | 0.959 |
| 3015 H2AFZ    | 55929 DMAP1    | 0.951 |
| 8724 SNX3     | 9877 ZC3H11A   | 0.963 |
| 8726 EED      | 3090 HIC1      | 0.969 |
| 50855 PARD6A  | 5584 PRKCI     | 0.961 |
| 50855 PARD6A  | 56288 PARD3    | 0.954 |
| 50855 PARD6A  | 84612 PARD6B   | 0.965 |
| 5660 PSAP     | 6836 SURF4     | 0.956 |
| 23239 PHLPP1  | 64854 USP46    | 0.95  |
| 6400 SEL1L    | 51465 UBE2J1   | 0.961 |
| 6400 SEL1L    | 79139 DERL1    | 0.978 |
| 6400 SEL1L    | 84447 SYVN1    | 0.965 |
| 836 CASP3     | 843 CASP10     | 0.957 |
| 8887 TAX1BP1  | 4646 MYO6      | 0.958 |
| 8887 TAX1BP1  | 10318 TNIP1    | 0.982 |
| 64975 MRPL41  | 51253 MRPL37   | 0.957 |
| 64975 MRPL41  | 124995 MRPL10  | 0.967 |
| 5062 PAK2     | 54926 UBE2R2   | 0.962 |
| 9577 BRE      | 675 BRCA2      | 0.952 |
| 79718 TBL1XR1 | 2874 GPS2      | 0.965 |
| 30001 ERO1L   | 9601 PDIA4     | 0.957 |
| 30001 ERO1L   | 23640 HSPBP1   | 0.954 |
| 30001 ERO1L   | 10785 WDR4     | 0.955 |
| 30001 ERO1L   | 64175 LEPRE1   | 0.956 |
| 8061 FOSL1    | 3726 JUNB      | 0.979 |
| 1453 CSNK1D   | 2273 FHL1      | 0.959 |
| 1453 CSNK1D   | 94274 PPP1R14A | 0.962 |
| 4798 NFRKB    | 10445 MCRS1    | 0.952 |
| 6904 TBCD     | 6301 SARS      | 0.965 |
| 6904 TBCD     | 55759 WDR12    | 0.959 |
| 6904 TBCD     | 51699 VPS29    | 0.969 |
| 6904 TBCD     | 26003 GORASP2  | 0.971 |
| 64785 GINS3   | 2937 GSS       | 0.965 |
| 64786 TBC1D15 | 10059 DNMT1L   | 0.973 |
| 51176 LEF1    | 4092 SMAD7     | 0.957 |
| 10320 IKZF1   | 1107 CHD3      | 0.951 |
| 10320 IKZF1   | 2623 GATA1     | 0.975 |
| 10320 IKZF1   | 23309 SIN3B    | 0.957 |



|                |                |       |
|----------------|----------------|-------|
| 7979 SHFM1     | 55756 INTS9    | 0.968 |
| 7979 SHFM1     | 26512 INTS6    | 0.974 |
| 7979 SHFM1     | 675 BRCA2      | 0.97  |
| 9140 ATG12     | 9474 ATG5      | 0.971 |
| 9140 ATG12     | 23192 ATG4B    | 0.964 |
| 9493 KIF23     | 9101 USP8      | 0.976 |
| 9146 HGS       | 9372 ZFYVE9    | 0.961 |
| 9146 HGS       | 10254 STAM2    | 0.956 |
| 373 TRIM23     | 9099 USP2      | 0.966 |
| 372 ARCN1      | 11316 COPE     | 0.951 |
| 843 CASP10     | 842 CASP9      | 0.96  |
| 843 CASP10     | 840 CASP7      | 0.979 |
| 843 CASP10     | 8797 TNFRSF10A | 0.965 |
| 842 CASP9      | 841 CASP8      | 0.959 |
| 842 CASP9      | 581 BAX        | 0.974 |
| 842 CASP9      | 329 BIRC2      | 0.956 |
| 841 CASP8      | 840 CASP7      | 0.967 |
| 841 CASP8      | 10134 BCAP31   | 0.955 |
| 4905 NSF       | 8773 SNAP23    | 0.962 |
| 4905 NSF       | 8775 NAPA      | 0.972 |
| 6464 SHC1      | 868 CBLB       | 0.952 |
| 26092 TOR1AIP1 | 55183 RIF1     | 0.979 |
| 114609 TIRAP   | 7099 TLR4      | 0.967 |
| 5001 ORC5L     | 5000 ORC4L     | 0.959 |
| 5001 ORC5L     | 8317 CDC7      | 0.959 |
| 5000 ORC4L     | 55388 MCM10    | 0.974 |
| 904 CCNT1      | 123169 LEO1    | 0.954 |
| 904 CCNT1      | 6879 TAF7      | 0.962 |
| 904 CCNT1      | 6872 TAF1      | 0.966 |
| 9559 VPS26A    | 9296 ATP6V1F   | 0.95  |
| 9559 VPS26A    | 51028 VPS36    | 0.957 |
| 9559 VPS26A    | 10059 DNMT1L   | 0.967 |
| 9559 VPS26A    | 10726 NUDC     | 0.959 |
| 9554 SEC22B    | 9217 VAPB      | 0.982 |
| 64223 MLST8    | 253260 RICTOR  | 0.95  |
| 84993 UBL7     | 283237 TTC9C   | 0.955 |
| 84993 UBL7     | 29978 UBQLN2   | 0.956 |
| 5584 PRKCI     | 84612 PARD6B   | 0.952 |
| 5588 PRKCQ     | 5170 PDPK1     | 0.973 |
| 64769 MEAF6    | 7994 MYST3     | 0.952 |
| 8317 CDC7      | 55388 MCM10    | 0.956 |
| 868 CBLB       | 23607 CD2AP    | 0.964 |
| 868 CBLB       | 7535 ZAP70     | 0.97  |
| 868 CBLB       | 1399 CRKL      | 0.97  |
| 868 CBLB       | 25 ABL1        | 0.96  |
| 868 CBLB       | 7410 VAV2      | 0.969 |

|               |              |       |
|---------------|--------------|-------|
| 868 CBLB      | 6850 SYK     | 0.966 |
| 10623 POLR3C  | 9330 GTF3C3  | 0.959 |
| 10623 POLR3C  | 2976 GTF3C2  | 0.968 |
| 861 RUNX1     | 865 CFBF     | 0.959 |
| 861 RUNX1     | 7994 MYST3   | 0.953 |
| 864 RUNX3     | 4090 SMAD5   | 0.951 |
| 9330 GTF3C3   | 29894 CPSF1  | 0.971 |
| 9444 QKI      | 51586 MED15  | 0.954 |
| 3054 HCFC1    | 9070 ASH2L   | 0.95  |
| 4597 MVD      | 2936 GSR     | 0.956 |
| 81611 ANP32E  | 5962 RDX     | 0.953 |
| 6446 SGK1     | 5598 MAPK7   | 0.959 |
| 6917 TCEA1    | 123169 LEO1  | 0.955 |
| 6917 TCEA1    | 2959 GTF2B   | 0.962 |
| 6917 TCEA1    | 80349 WDR61  | 0.969 |
| 92483 LDHAL6B | 55577 NAGK   | 0.95  |
| 60412 EXOC4   | 149371 EXOC8 | 0.958 |
| 960 CD44      | 7410 VAV2    | 0.977 |
| 3098 HK1      | 11235 PDCD10 | 0.962 |
| 1612 DAPK1    | 8772 FADD    | 0.954 |
| 1676 DFFA     | 5198 PFAS    | 0.959 |
| 64965 MRPS9   | 51021 MRPS16 | 0.95  |
| 4204 MECP2    | 6670 SP3     | 0.955 |
| 148022 TICAM1 | 7099 TLR4    | 0.961 |
| 148022 TICAM1 | 54476 RNF216 | 0.96  |
| 23404 EXOSC2  | 57379 AICDA  | 0.968 |
| 6118 RPA2     | 29978 UBQLN2 | 0.969 |
| 6119 RPA3     | 60491 NIF3L1 | 0.95  |
| 9101 USP8     | 10254 STAM2  | 0.953 |
| 9101 USP8     | 57159 TRIM54 | 0.956 |
| 136319 MTPN   | 523 ATP6V1A  | 0.953 |
| 10589 DRAP1   | 51616 TAF9B  | 0.966 |
| 11186 RASSF1  | 83593 RASSF5 | 0.956 |
| 7419 VDAC3    | 6342 SCP2    | 0.952 |
| 7419 VDAC3    | 9218 VAPA    | 0.954 |
| 7419 VDAC3    | 9217 VAPB    | 0.95  |
| 7419 VDAC3    | 4701 NDUFA7  | 0.954 |
| 440 ASNS      | 2937 GSS     | 0.95  |
| 445 ASS1      | 1977 EIF4E   | 0.955 |
| 445 ASS1      | 5476 CTSA    | 0.967 |
| 445 ASS1      | 10072 DPP3   | 0.965 |
| 283237 TTC9C  | 7336 UBE2V2  | 0.957 |
| 283237 TTC9C  | 7335 UBE2V1  | 0.954 |
| 7706 TRIM25   | 10616 RBCK1  | 0.968 |
| 7706 TRIM25   | 51619 UBE2D4 | 0.95  |
| 3635 INPP5D   | 613 BCR      | 0.971 |

|                |                |       |
|----------------|----------------|-------|
| 55577 NAGK     | 10944 C11orf58 | 0.964 |
| 7133 TNFRSF1B  | 10293 TRAIP    | 0.971 |
| 581 BAX        | 4170 MCL1      | 0.963 |
| 1436 CSF1R     | 6654 SOS1      | 0.973 |
| 11235 PDCD10   | 5198 PFAS      | 0.952 |
| 11235 PDCD10   | 55148 UBR7     | 0.95  |
| 55388 MCM10    | 4171 MCM2      | 0.95  |
| 51400 PPME1    | 10785 WDR4     | 0.95  |
| 23429 RYBP     | 54880 BCOR     | 0.964 |
| 9601 PDIA4     | 501 ALDH7A1    | 0.959 |
| 10944 C11orf58 | 9627 SNCAIP    | 0.952 |
| 10944 C11orf58 | 6611 SMS       | 0.979 |
| 79874 RABEP2   | 23607 CD2AP    | 0.95  |
| 10616 RBCK1    | 27338 UBE2S    | 0.963 |
| 10616 RBCK1    | 9099 USP2      | 0.958 |
| 2065 ERBB3     | 7535 ZAP70     | 0.966 |
| 2065 ERBB3     | 1399 CRKL      | 0.952 |
| 2065 ERBB3     | 3572 IL6ST     | 0.955 |
| 2067 ERCC1     | 6879 TAF7      | 0.964 |
| 2067 ERCC1     | 6878 TAF6      | 0.951 |
| 2067 ERCC1     | 84464 BTBD12   | 0.957 |
| 60626 RIC8A    | 80349 WDR61    | 0.967 |
| 467 ATF3       | 4097 MAFG      | 0.96  |
| 123169 LEO1    | 1788 DNMT3A    | 0.971 |
| 123169 LEO1    | 80349 WDR61    | 0.968 |
| 10134 BCAP31   | 79139 DERL1    | 0.955 |
| 10133 OPTN     | 10318 TNIP1    | 0.973 |
| 10138 YAF2     | 54880 BCOR     | 0.95  |
| 84262 PSMG3    | 10059 DNMT1L   | 0.975 |
| 29950 SERTAD1  | 894 CCND2      | 0.968 |
| 5525 PPP2R5A   | 5527 PPP2R5C   | 0.972 |
| 5528 PPP2R5D   | 10095 ARPC1B   | 0.977 |
| 5528 PPP2R5D   | 5905 RANGAP1   | 0.952 |
| 51465 UBE2J1   | 55432 YOD1     | 0.971 |
| 51465 UBE2J1   | 79139 DERL1    | 0.971 |
| 51465 UBE2J1   | 84447 SYVN1    | 0.956 |
| 23624 CBLC     | 7535 ZAP70     | 0.966 |
| 23192 ATG4B    | 8408 ULK1      | 0.975 |
| 25936 NSL1     | 10403 NDC80    | 0.952 |
| 7511 XPNPEP1   | 55236 UBA6     | 0.959 |
| 55905 RNF114   | 10293 TRAIP    | 0.966 |
| 7994 MYST3     | 84289 ING5     | 0.952 |
| 7994 MYST3     | 11091 WDR5     | 0.972 |
| 79813 EHMT1    | 1788 DNMT3A    | 0.974 |
| 11267 SNF8     | 51028 VPS36    | 0.961 |
| 54880 BCOR     | 10336 PCGF3    | 0.966 |

|                |                |       |
|----------------|----------------|-------|
| 10092 ARPC5    | 10094 ARPC3    | 0.95  |
| 28969 BZW2     | 5198 PFAS      | 0.954 |
| 7070 THY1      | 9997 SCO2      | 0.967 |
| 55759 WDR12    | 51028 VPS36    | 0.96  |
| 55759 WDR12    | 7251 TSG101    | 0.955 |
| 51616 TAF9B    | 6872 TAF1      | 0.962 |
| 10403 NDC80    | 9212 AURKB     | 0.951 |
| 23154 NCDN     | 5504 PPP1R2    | 0.969 |
| 84246 MED10    | 80306 MED28    | 0.96  |
| 29978 UBQLN2   | 10785 WDR4     | 0.96  |
| 23607 CD2AP    | 23325 KIAA1033 | 0.955 |
| 7681 MKRN3     | 7336 UBE2V2    | 0.973 |
| 369 ARAF       | 673 BRAF       | 0.96  |
| 369 ARAF       | 65125 WNK1     | 0.965 |
| 81608 FIP1L1   | 29894 CPSF1    | 0.953 |
| 4831 NME2      | 4830 NME1      | 0.976 |
| 5290 PIK3CA    | 9138 ARHGEF1   | 0.956 |
| 7336 UBE2V2    | 51569 UFM1     | 0.964 |
| 7335 UBE2V1    | 9296 ATP6V1F   | 0.955 |
| 10212 DDX39    | 6611 SMS       | 0.95  |
| 50626 CYHR1    | 10059 DNM1L    | 0.978 |
| 9997 SCO2      | 6342 SCP2      | 0.955 |
| 9997 SCO2      | 4701 NDUFA7    | 0.962 |
| 11034 DSTN     | 10802 SEC24A   | 0.953 |
| 11035 RIPK3    | 8772 FADD      | 0.96  |
| 51586 MED15    | 80306 MED28    | 0.962 |
| 26271 FBXO5    | 27338 UBE2S    | 0.967 |
| 26271 FBXO5    | 51529 ANAPC11  | 0.963 |
| 5906 RAP1A     | 6009 RHEB      | 0.951 |
| 10785 WDR4     | 64175 LEPRE1   | 0.957 |
| 10785 WDR4     | 10055 SAE1     | 0.962 |
| 2957 GTF2A1    | 6878 TAF6      | 0.951 |
| 2957 GTF2A1    | 6872 TAF1      | 0.966 |
| 2957 GTF2A1    | 26003 GORASP2  | 0.957 |
| 11075 STMN2    | 10802 SEC24A   | 0.967 |
| 8673 VAMP8     | 8773 SNAP23    | 0.964 |
| 8673 VAMP8     | 8775 NAPA      | 0.971 |
| 4091 SMAD6     | 11059 WWP1     | 0.965 |
| 4091 SMAD6     | 657 BMPR1A     | 0.957 |
| 25836 NIPBL    | 6672 SP100     | 0.967 |
| 6654 SOS1      | 613 BCR        | 0.986 |
| 10801          | 8801 SUCLG2    | 0.954 |
| 10802 SEC24A   | 10059 DNM1L    | 0.969 |
| 8795 TNFRSF10B | 8797 TNFRSF10A | 0.951 |
| 8797 TNFRSF10A | 8772 FADD      | 0.963 |
| 5962 RDX       | 7430 EZR       | 0.95  |

9-Sep

|              |       |               |       |
|--------------|-------|---------------|-------|
| 5962 RDX     |       | 2935 GSPT1    | 0.98  |
| 9230 RAB11B  |       | 2665 GDI2     | 0.963 |
| 9232 PTTG1   |       | 51529 ANAPC11 | 0.969 |
| 10274 STAG1  |       | 10735 STAG2   | 0.951 |
| 8651 SOCS1   |       | 7410 VAV2     | 0.97  |
| 51699 VPS29  |       | 51028 VPS36   | 0.96  |
| 2107 ETF1    |       | 2935 GSPT1    | 0.967 |
| 54472 TOLLIP |       | 3554 IL1R1    | 0.955 |
| 54472 TOLLIP |       | 23543 RBM9    | 0.955 |
| 891 CCNB1    |       | 995 CDC25C    | 0.957 |
| 892 CCNC     |       | 80306 MED28   | 0.959 |
| 6879 TAF7    |       | 6878 TAF6     | 0.963 |
| 6879 TAF7    |       | 6872 TAF1     | 0.976 |
| 6878 TAF6    |       | 6873 TAF2     | 0.95  |
| 6873 TAF2    |       | 6872 TAF1     | 0.959 |
| 55432 YOD1   |       | 57159 TRIM54  | 0.966 |
| 989          | 7-Sep | 6836 SURF4    | 0.968 |
| 57466 SFRS15 |       | 9217 VAPB     | 0.954 |
| 27338 UBE2S  |       | 51529 ANAPC11 | 0.962 |
| 9218 VAPA    |       | 9217 VAPB     | 0.971 |
| 9070 ASH2L   |       | 7391 USF1     | 0.951 |
| 10297 APC2   |       | 51529 ANAPC11 | 0.956 |
| 9877 ZC3H11A |       | 4701 NDUFA7   | 0.963 |
| 11091 WDR5   |       | 80349 WDR61   | 0.959 |
